# Supplementary material
Source: PubMed Central journal article supplement (PMC10503429)
Supplement: NIHMS1925130-supplement-34676539_Schnermann_SM1.pdf [file NIHMS1925130-supplement-34676539_Schnermann_SM1.pdf]

# **Ketone Incorporation Extends the Emission Properties of the Xanthene Scaffold Beyond 1000 nm**

Harrison C. Daly,<sup>1</sup> Siddharth S. Matikonda,<sup>1</sup> Helena Steffens,<sup>1</sup> Bastian Ruehle,<sup>2</sup> Ute Resch-Genger,<sup>2</sup> Joseph Ivanic,<sup>\*3</sup> Martin J. Schnermann<sup>\*1</sup>

<sup>1</sup>Chemical Biology Laboratory, Center for Cancer Research, National Cancer Institute, National Institutes of Health, Frederick, Maryland 21702, USA

USA

<sup>2</sup>Division Biophotonics, Federal Institute of Materials Research and Testing, BAM, D-12489, Berlin, Germany

<sup>3</sup>Advanced Biomedical Computational Science, Frederick National Laboratory for Cancer Research, Leidos Biomedical Research Inc., Frederick, Maryland 21702

\*Corresponding authors e-mail: [joseph.ivanic@nih.gov](mailto:joseph.ivanic@nih.gov) (Joseph Ivanic)  
[martin.schnermann@nih.gov](mailto:martin.schnermann@nih.gov) (Martin J. Schnermann)

## Table of Contents

|                                                                                                                                                                                   |    |
|-----------------------------------------------------------------------------------------------------------------------------------------------------------------------------------|----|
| <i>Section S1: Supplementary Figures and Tables</i> .....                                                                                                                         | 3  |
| <i>Section S2: General Experimental and Materials</i> .....                                                                                                                       | 8  |
| <i>Section S3 Synthetic Procedures</i> .....                                                                                                                                      | 9  |
| <i>Section S4: Retro-Brook Rearrangement Experiment and NMR Analysis</i> .....                                                                                                    | 26 |
| <i>Section S5: Photophysical Measurements</i> .....                                                                                                                               | 29 |
| <i>Section S6: <sup>1</sup>H, <sup>13</sup>C and Associated 2D NMR Spectra</i> .....                                                                                              | 31 |
| <i>Section S7: Computational Chemistry</i> .....                                                                                                                                  | 51 |
| <i>Section S8: Raw Computational Chemistry Data</i> .....                                                                                                                         | 55 |
| I. Energies (S0 & S1* in hartree), oscillator strengths (S0 → S1*), HOMO and LUMO energies (hartree), excitation/de-excitation amplitudes, and S0 optimized structures (Å) .....  | 55 |
| II. Energies (S0* & S1 in hartree), oscillator strengths (S1 → S0*), HOMO and LUMO energies (hartree), excitation/de-excitation amplitudes, and S1 optimized structures (Å) ..... | 67 |
| <i>Section S9: References</i> .....                                                                                                                                               | 79 |

### Section S1: Supplementary Figures and Tables

| R Group | Structure                                                                           | Year | Solvent                     | $\lambda_{\text{abs}}$ (nm) | $\epsilon$ ( $\text{M}^{-1}\text{cm}^{-1}$ ) | $\lambda_{\text{em}}$ (nm) | $\Phi_{\text{F}}$ | Lit. ref        |
|---------|-------------------------------------------------------------------------------------|------|-----------------------------|-----------------------------|----------------------------------------------|----------------------------|-------------------|-----------------|
| R1      | 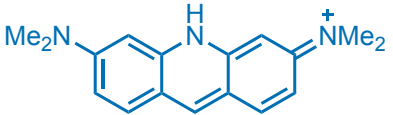   | 2015 | Aq. buffer                  | 493                         | 50,000                                       | 528                        | 0.21              | (1)             |
| R2      |    | 2011 | HEPES, 7.4                  | 547                         | -                                            | 562                        | 0.4               | (2)             |
| R3      |    | 2011 | EtOH                        | 605                         | -                                            | 627                        | 0.71              | (3)             |
| R4      |    | 2014 | PBS                         | 634                         | 48,600                                       | 648                        | 0.42              | (4) (SI)<br>(2) |
| R5      |   | 2016 | PBS 10mM<br>pH 7.4 1% DMSO  | 700                         | 71,000                                       | 722                        | 0.11              | (5)             |
| R6      |  | 2016 | PBS pH 7.4 (0.25%<br>CH3CN) | 703                         | 39,000                                       | 734                        | 0.067             | (6)             |

|    |  |      |                                 |     |        |     |       |           |
|----|--|------|---------------------------------|-----|--------|-----|-------|-----------|
| R7 |  | 2021 | CH <sub>2</sub> Cl <sub>2</sub> | 855 | 28,400 | 911 | 0.013 | This work |
|----|--|------|---------------------------------|-----|--------|-----|-------|-----------|

**Table S1:** Structures, photophysical properties and literature references of previously reported compounds in Figure 1A.

| R Group | Structure                                                                          | Year | Solvent            | $\lambda_{\text{abs}}$ (nm) | $\epsilon$ ( $\text{M}^{-1}\text{cm}^{-1}$ ) | $\lambda_{\text{em}}$ (nm) | $\Phi_{\text{F}}$ | Lit ref |
|---------|------------------------------------------------------------------------------------|------|--------------------|-----------------------------|----------------------------------------------|----------------------------|-------------------|---------|
| R1      | 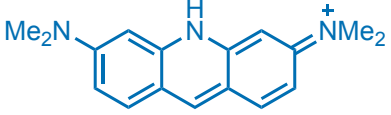  | 2015 | Aq. buffer         | 493                         | 50,000                                       | 528                        | 0.21              | (1)     |
| R2      |   | 2011 | PBS pH 7.4         | 549                         | 72,000                                       | 570                        | 0.31              | (6)     |
| R3      |   | 2011 | Aq. buffer         | 606                         | 121,000                                      | 626                        | 0.52              | (1)     |
| R4      |  | 2014 | 20mM PBS<br>pH 7.4 | 647                         | 110,000                                      | 661                        | 0.31              | (6)     |

|    |                                                                                   |      |                                |     |        |       |         |           |
|----|-----------------------------------------------------------------------------------|------|--------------------------------|-----|--------|-------|---------|-----------|
| R5 | 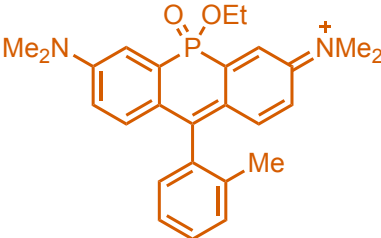 | 2016 | PBS 10mM<br>pH 7.4 1%<br>DMSO  | 700 | 71,000 | 722   | 0.11    | (5)       |
| R6 |  | 2016 | PBS pH 7.4<br>(0.25%<br>CH3CN) | 703 | 62,000 | 734   | 0.06    | (6)       |
| R7 |  | 2021 | PBS pH 7.4                     | 862 | 16,500 | 1,058 | 0.00013 | This work |

**Table S2:** Structures, photophysical properties and literature references of dyes used in absorbance oscillator strengths ( $S_0 \rightarrow S_1^*$ ) and ( $S_1^* \rightarrow S_0$ ) vs. extinction coefficient (Figure 1E/ F).

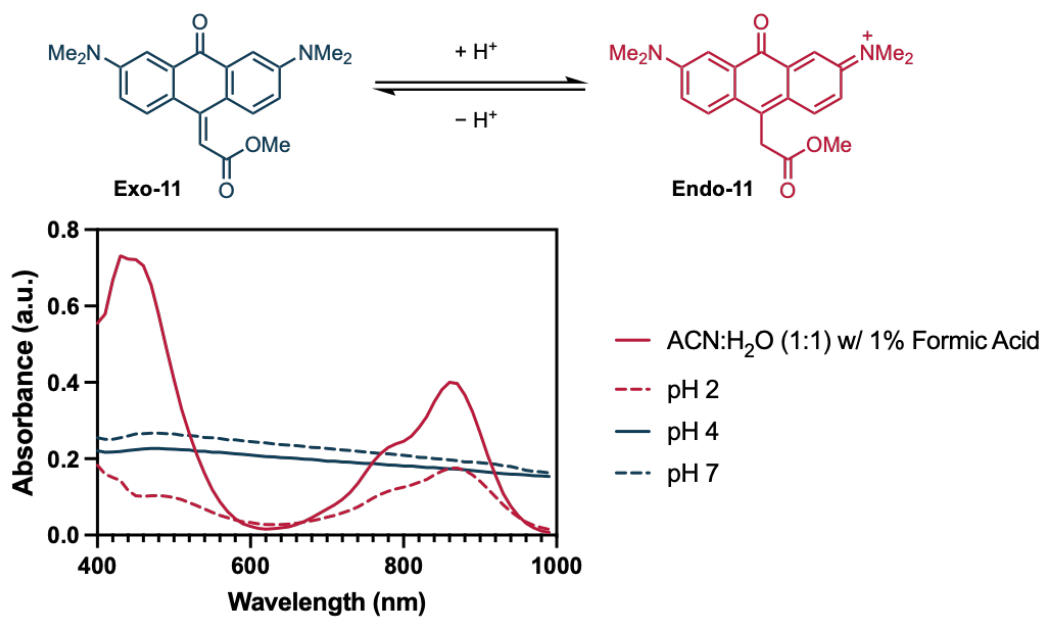

**Figure S1:** Exo- to endo-switching of dye **11** (200  $\mu\text{M}$ ) in acidic media.

## Section S2: General Experimental and Materials

Unless stated otherwise, reactions were conducted in oven-dried glassware under an atmosphere of nitrogen or argon using anhydrous solvents (passed through activated alumina columns). All commercially obtained reagents were used as received. Flash column chromatography was performed using reversed phase (100 Å, 20-40-micron particle size, RediSep® Rf Gold® Reversed-phase C18 or C18Aq) and silica on a CombiFlash® Rf 200i (Teledyne Isco, Inc.) High-resolution LC/MS analyses were conducted on a ThermoFisher LTQ-Orbitrap-XL hybrid mass spectrometer system with an Ion MAX API electrospray ion source in negative ion mode. Analytical LC/MS was performed using a Shimadzu LCMS-2020 Single Quadrupole utilizing a Kinetex C18 column (100 Å, 2.6 µm, 2.1 x 50 mm) obtained from Phenomenex, Inc (Torrance, CA). Runs employed a gradient of 0-90% MeCN/0.1% aqueous formic acid over 4.5 min at a flow rate of 0.2 mL/min. <sup>1</sup>H NMR and <sup>13</sup>C NMR spectra were recorded on Bruker spectrometers (at 400 or 500 MHz or at 100 or 125 MHz) and are reported relative to deuterated solvent signals. Data for <sup>1</sup>H NMR spectra are reported as follows: chemical shift (δ ppm), multiplicity, coupling constant (Hz), and integration. Data for <sup>13</sup>C NMR spectra are reported in terms of chemical shift. Absorbance curves were obtained on a PerkinElmer UV/Vis Photodiode Array Spectrophotometer Lambda 465 (Scan No. 30. Integration No. 1). Molar absorption coefficients (ε) were determined in PBS (50 mM, pH 7.4), CH<sub>2</sub>Cl<sub>2</sub>, CH<sub>2</sub>Cl<sub>2</sub> supplemented with 5 % Trifluoroacetic Acid or Acetate Buffer (0.05M) at pH 3.6 using Beer's law, from plots of absorbance vs. concentration. Measurements were performed in 10 mm path length quartz cuvettes (Hellma 111-QS) that were maintained at room temperature. Fluorescence traces were recorded on aPTI QuantaMaster steady state spectrofluorometer operated by FelixGX 4.2.2 software, with 15 nm excitation and 20nm emission slit widths with a 1 nm step size and 1 s integration rate. Microplates were read on Synergy Mx microplate reader. pH values were determined using a Fisherbrand™ accumet™ AB150 pH Benchtop Meter. All statistical analyses were carried out by Graphpad Prism version 9.0 (Graphpad Software). See section S7 and S8 for computational chemistry methods and results.



## Section S3 Synthetic Procedures

### bis(2-bromo-5-(dimethylamino)phenyl)methanone (7)

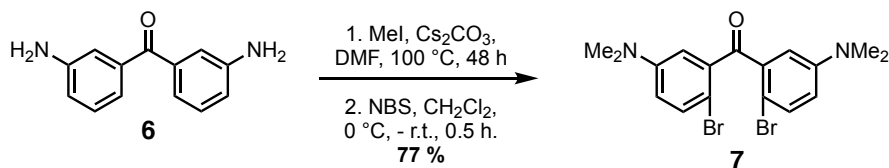

To a solution of bis(2-bromo-5-(dimethylamino)phenyl)methanone (5.0 g, 0.012 mmol, 1.0 eq.) in DMF (19 mL, 0.12 M) at 0 °C under a N<sub>2</sub> atmosphere Cs<sub>2</sub>CO<sub>3</sub> (46 g, 0.14 mol, 6.0 eq.) was added. The reaction mixture was sonicated and set to stir at room temperature before addition of iodomethane (7.3 mL, 0.12 mol, 5 eq.) *via* syringe. The suspension was then heated to 100 °C for 48 hours. The reaction was quenched with an excess of NaHCO<sub>3</sub> (sat.) and transferred to a separatory funnel with additional H<sub>2</sub>O used to dissolve any salts present. The crude mixture was extracted with EtOAc × 2 with the organic phase then washed with brine × 2, dried over Na<sub>2</sub>SO<sub>4</sub>, filtered and evaporated to dryness *in vacuo* with water heating bath set at 60 °C. Bis(3-(dimethylamino)phenyl)methanone **1** was isolated as a brown oil (5.98 g) was used without further purification.

<sup>1</sup>H NMR (400 MHz, CDCl<sub>3</sub>) δ: 7.30 (t, *J* = 7.9 Hz, 2H), 7.23 – 7.18 (m, 2H), 7.10 (d, *J* = 7.6 Hz, 2H), 6.93 (dd, *J* = 8.3, 2.8, Hz, 2H), 2.99 (12H) ppm. <sup>13</sup>C NMR (100 MHz, CDCl<sub>3</sub>) δ: 198.3, 150.5, 138.9, 128.7, 118.9, 116.3, 113.6, 40.7 ppm. HRMS (ESI) *m/z*: [M+H]<sup>+</sup> Calcd. for C<sub>17</sub>H<sub>20</sub>N<sub>2</sub>O 268.1576; Found 268.1571.

To the resultant crude material **1** (5.98 g, 0.0222 mol, 1.0 eq.) CH<sub>2</sub>Cl<sub>2</sub> (225 mL, 0.1 M) was added. The reaction mixture was sonicated to ensure dissolution and set to stir at room temperature under a N<sub>2</sub> atmosphere for 10 minutes before cooling to 0 °C in an ice bath. *N*-bromosuccinimide (7.94 g, 0.0446 mol, 2.0 eq.) was then added portion wise and the reaction was followed by TLC (4:1, Hexanes: EtOAc, R<sub>f</sub>: 0.45) with typical reaction times of 30 minutes. Once the reaction was judged to have gone to completion it was quenched with NaHCO<sub>3</sub> (sat.), extracted with EtOAc × 2. The organic phase washed with brine × 2, dried over Na<sub>2</sub>SO<sub>4</sub>, filtered and evaporated to dryness *in vacuo*. The residue was purified by normal-phase column chromatography (120 g C18 column, 0 → 10% hexanes /EtOAc) to afford bis(2-bromo-5-(dimethylamino)phenyl)methanone **7** (7.68 g, 77 %) as a bright yellow solid.

<sup>1</sup>H NMR (400 MHz, CDCl<sub>3</sub>) δ: 7.40 (d, *J* = 8.8 Hz, 2H), 6.81 (d, *J* = 3.2 Hz, 2H), 6.68 (dd, *J* = 8.9, 3.2 Hz, 2H), 2.92 (s, 12H) ppm. <sup>13</sup>C NMR (100 MHz, CDCl<sub>3</sub>) δ: 196.9, 149.5, 139.8, 134.3, 116.4, 115.1, 107.1, 40.6 ppm. HRMS (ESI) *m/z*: [M+H]<sup>+</sup> Calcd. for C<sub>17</sub>H<sub>18</sub>Br<sub>2</sub>N<sub>2</sub>O 425.9765; Found 425.9766.

### bis(2-bromo-5-(dimethylamino)phenyl)methanol (**12**)

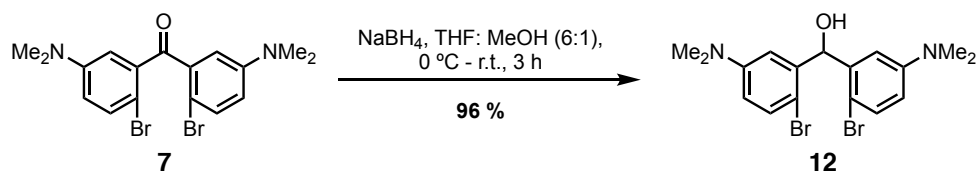

To bis(2-bromo-5-(dimethylamino)phenyl)methanone **7** (2.55 g, 5.89 mmol, 1.0 eq.) in a 500 mL round bottom flask under a N<sub>2</sub> atmosphere (N<sub>2</sub> balloon) THF (100 mL) was added and set to stir at room temperature. Once fully dissolved the solution was cooled to 0 °C in an ice bath and MeOH (17 mL, 0.05 M) was added. After 15 minutes NaBH<sub>4</sub> (2.3 g, 0.059 mol, 10 eq.) was added portion wise. The reaction mixture was kept at 0 °C for 1 hour and allowed to gradually warm to room temperature. The reaction was followed by TLC (4:1, Hexanes: EtOAc, R<sub>f</sub>: 0.23) and once judged to have gone to completion the reaction mixture was cooled in an ice bath and quenched carefully using NH<sub>4</sub>Cl (sat.). Additional H<sub>2</sub>O was used to dissolve any salts present and the reaction mixture was extracted with EtOAc × 2. The organic phase then washed with brine × 2, dried over Na<sub>2</sub>SO<sub>4</sub>, filtered and evaporated to dryness *in vacuo*. Bis(2-bromo-5-(dimethylamino)phenyl)methanol **12** (2.45g, 96 %) was isolated as a light yellow solid and used without further purification.

<sup>1</sup>H NMR (400 MHz, CDCl<sub>3</sub>) δ 7.36 (d, *J* = 8.8 Hz, 2H), 6.73 (d, *J* = 3.2 Hz, 2H), 6.53 (dd, *J* = 8.8, 3.2 Hz, 2H), 6.28 (s, 1H), 2.87 (s, 12H) ppm. <sup>13</sup>C NMR (100 MHz, CDCl<sub>3</sub>) δ 150.1, 141.20, 133.0, 113.5, 113.0, 110.1, 74.7, 40.7 ppm. HRMS (ESI) *m/z*: [M+H]<sup>+</sup> Calcd. for C<sub>17</sub>H<sub>20</sub>Br<sub>2</sub>N<sub>2</sub>O 427.9922; Found 427.9920.

### 3,3'-((methoxymethoxy)methylene)bis(4-bromo-*N,N*-dimethylaniline) (**2a**)

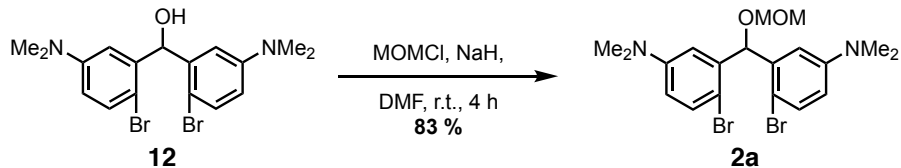

To a stirred solution of bis(2-bromo-5-(dimethylamino)phenyl)methanol **12** (500 mg, 1.17 mmol, 1.0 eq.) in DMF (4.0 mL, 0.29 M) under an Ar atmosphere at 0 °C, sodium hydride (84 mg, 3.5 mol, 3.0 eq.) was added and the reaction was stirred at room temperature for 30 minutes. To the crude reaction mixture at 0 °C chloromethyl methyl ether (130  $\mu$ L, 1.8 mmol, 1.5 eq.) was added *via* syringe and the reaction set to stir at room temperature for 3.5 hours. Once the reaction was judged to have gone to completion (TLC, 4:1, Hexanes: EtOAc,  $R_f$ : 0.4) the reaction mixture was cooled in an ice bath and quenched using  $\text{NH}_4\text{Cl}$  (sat.). The reaction mixture was extracted with EtOAc  $\times$  2 with the organic phase then washed with brine  $\times$  2, dried over  $\text{Na}_2\text{SO}_4$ , filtered and evaporated to dryness *in vacuo*. The residue was purified by normal-phase column chromatography (12 g C18 gold column, 0  $\rightarrow$  10% hexanes /EtOAc) to afford 3,3'-((methoxymethoxy)methylene)bis(4-bromo-*N,N*-dimethylaniline) **2a** (460 mg, 83 %) as an off-white solid.

$^1\text{H}$  NMR (400 MHz,  $\text{CDCl}_3$ )  $\delta$  7.35 (d,  $J$  = 8.8 Hz, 2H), 6.80 (d,  $J$  = 3.1 Hz, 2H), 6.53 (dd,  $J$  = 8.8, 3.2 Hz, 2H), 6.26 (s, 1H), 4.80 (s, 2H), 3.46 (s, 3H), 2.88 (s, 12H);  $^{13}\text{C}$  NMR (100 MHz,  $\text{CDCl}_3$ )  $\delta$  149.9, 139.7, 133.2, 113.7, 113.6, 110.8, 95.8, 78.5, 56.8, 40.7 ppm. HRMS (ESI)  $m/z$ :  $[\text{M}+\text{H}]^+$  Calcd. for  $\text{C}_{19}\text{H}_{24}\text{Br}_2\text{N}_2\text{O}_2$  472.0184; Found 472.0187.

### 3,3'-(methoxymethylene)bis(4-bromo-*N,N*-dimethylaniline) (**2b**)

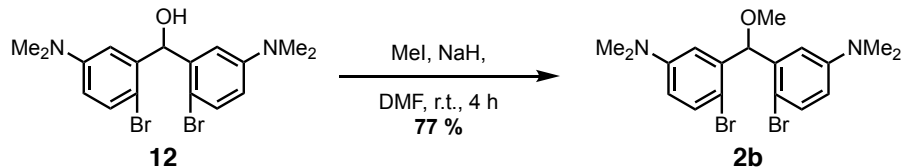

To a stirred solution of bis(2-bromo-5-(dimethylamino)phenyl)methanol **12b** (500 mg, 1.17 mmol, 1.0 eq.) in DMF (4.0 mL, 0.29 M) under an Ar atmosphere at 0 °C, sodium hydride (84 mg, 3.5 mol, 3.0 eq.) was added and the reaction was stirred at room temperature for 30 minutes. To the crude reaction mixture at 0 °C iodomethane (110  $\mu$ L, 1.8 mmol, 1.5 eq.) was added *via* syringe and the reaction set to stir at room temperature for 3.5 hours. Once the reaction was judged to have gone to completion (TLC, 4:1, Hexanes: EtOAc,  $R_f$ : 0.5) the reaction mixture was cooled in an ice bath and quenched using  $\text{NH}_4\text{Cl}$  (sat.). The reaction mixture was extracted with EtOAc  $\times$  2 with the organic phase then washed with brine  $\times$  2, dried over  $\text{Na}_2\text{SO}_4$ , filtered and evaporated to dryness *in vacuo*. The residue was purified by normal-phase column chromatography (12 g C18 gold column, 0  $\rightarrow$  10% hexanes /EtOAc) to afford 3,3'-(methoxymethylene)bis(4-bromo-*N,N*-dimethylaniline) **2b** (400 mg, 77 %) as light brown solid.

$^1\text{H}$  NMR (400 MHz,  $\text{CDCl}_3$ )  $\delta$ : 7.37 (d,  $J$  = 8.8 Hz, 2H), 6.69 (d,  $J$  = 3.1 Hz, 2H), 6.53 (dd,  $J$  = 8.8, 3.1 Hz, 2H), 5.79 (s, 1H), 3.52 (s, 3H), 2.87 (s, 12H);  $^{13}\text{C}$  NMR (100 MHz,  $\text{CDCl}_3$ )  $\delta$ : 150.0, 139.35, 133.1, 113.6, 113.3, 111.3, 83.5, 58.3, 40.7 ppm. HRMS (ESI)  $m/z$ :  $[\text{M}+\text{H}]^+$  Calcd. for  $\text{C}_{18}\text{H}_{22}\text{Br}_2\text{N}_2\text{O}_2$  442.0078; Found 442.0080.

### 3,3'-(((*tert*-butyldimethylsilyl)oxy)methylene)bis(4-bromo-*N,N*-dimethylaniline) (**2c**)

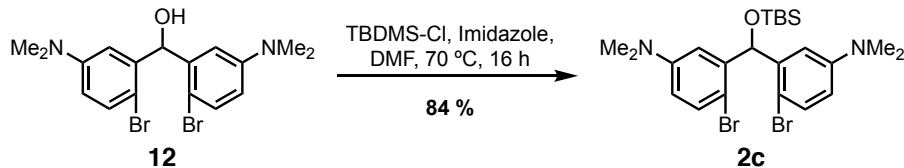

To bis(2-bromo-5-(dimethylamino)phenyl)methanol **12** (2.5 g, 0.0058 mol, 1.0 eq.), imidazole (1.19 g, 0.0175 mol, 3.0 eq.) and *tert*-butyldimethylsilyl chloride (1.76 g, 0.00117 mol, 2.0 eq.) in an Ar flushed round-bottom flask DMF (25 mL, 0.23 M) was added. The reaction was set to stir at room temperature before heating to 70 °C overnight. The cooled reaction mixture was suspended in 2:1 EtOAc/ NaHCO<sub>3</sub> (sat.) and extracted with EtOAc. The aqueous phase was re-extracted with additional EtOAc and combined organic phase were washed with brine × 2, dried over Na<sub>2</sub>SO<sub>4</sub>, filtered and evaporated to dryness *in vacuo*. The residue was purified by normal-phase column chromatography (40 g silica gold column, 0 → 10% hexanes /EtOAc) and dried under hi-vacuum to afford 3,3'-(((*tert*-butyldimethylsilyl)oxy)methylene)bis(4-bromo-*N,N*-dimethylaniline) **2c** (2.7 g, 84 %) as an off-white solid.

<sup>1</sup>H NMR (400 MHz, DMSO-*d*<sub>6</sub>) δ: 7.30 (d, *J* = 8.8 Hz, 2H), 6.83 (d, *J* = 3.2 Hz, 2H), 6.59 (dd, *J* = 8.9, 3.2 Hz, 2H), 6.15 (s, 1H), 2.83 (s, 12H), 0.87 (s, 9H), 0.02 (s, 6H); <sup>13</sup>C NMR (100 MHz, DMSO-*d*<sub>6</sub>) δ: 149.5, 141.6, 132.6, 113.6, 112.9, 108.3, 74.5, 39.9, 25.7, 17.8, - 4.40 ppm. HRMS (ESI) *m/z*: [M+H]<sup>+</sup> Calcd. for C<sub>23</sub>H<sub>34</sub>Br<sub>2</sub>N<sub>2</sub>O<sub>2</sub>Si 542.0787; Found 542.0790.

### 9-(methoxymethoxy)-*N*<sup>2</sup>,*N*<sup>2</sup>,*N*<sup>7</sup>,*N*<sup>7</sup>-tetramethyl-10-(*o*-tolyl)anthracene-2,7-diamine (**3a**)

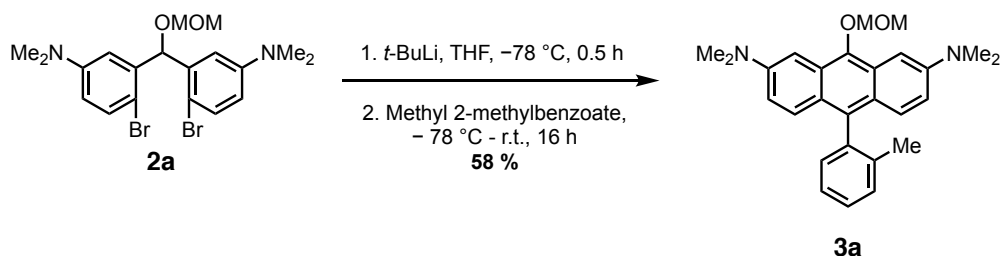

To 9-(methoxymethoxy)-*N*<sup>2</sup>,*N*<sup>2</sup>,*N*<sup>7</sup>,*N*<sup>7</sup>-tetramethyl-10-(*o*-tolyl)anthracene-2,7-diamine **2a** (200 mg, 0.423 mmol, 1.0 eq.) in a flame-dried crimped 25 mL microwave vial under an Ar atmosphere, THF (10 mL, 0.042 M) was added. The solution was stirred at room temperature before cooling to -78 °C in a dry ice/ acetone bath. The solution was then treated with *tert*-Butyllithium solution (1.1 mL, 1.9 mmol, 4.4 eq.) and allowed stir at -78 °C for 0.5 h. A separately prepared solution of methyl 2-methylbenzoate (130  $\mu$ L, 0.93 mmol, 2.2 eq.) in THF (5.0 mL, 0.17 M) under an Ar atmosphere was then added dropwise to the -78 °C reaction mixture. The reaction mixture was allowed stir for 1 hour at -78 °C before removal from the cold bath, covering with aluminum foil and allowing to gradually equilibrate to room temperature overnight for a total reaction time of 16 hours. The reaction mixture was then quenched at -78 °C with an excess of NH<sub>4</sub>Cl (sat.) and transferred to a separatory funnel with additional H<sub>2</sub>O used to dissolve any salts present. The crude mixture was extracted with EtOAc  $\times$  2 with the organic phase then washed with brine  $\times$  2, dried over Na<sub>2</sub>SO<sub>4</sub>, filtered and evaporated to dryness *in vacuo*. The yellow residue was purified by normal-phase column chromatography (12 g silica gold column, 0  $\rightarrow$  10% hexanes /EtOAc) to afford 9-(methoxymethoxy)-*N*<sup>2</sup>,*N*<sup>2</sup>,*N*<sup>7</sup>,*N*<sup>7</sup>-tetramethyl-10-(*o*-tolyl)anthracene-2,7-diamine **3a** (101 mg, 58 %) as a bright yellow solid.

<sup>1</sup>H NMR (400 MHz, DMSO-*d*<sub>6</sub>)  $\delta$ : 7.47 – 7.41 (m, 2H), 7.40 – 7.34 (m, 1H), 7.19 – 7.06 (m, 7H), 5.31 (s, 2H), 3.74 (s, 3H), 3.03 (s, 12H), 1.78 (s, 3H); <sup>13</sup>C NMR (100 MHz, DMSO-*d*<sub>6</sub>)  $\delta$  147.5, 143.3, 138.0, 137.0, 131.6, 130.9, 129.9, 127.7, 127.0, 126.3, 125.9, 122.44, 116.7, 99.2, 97.7, 57.2, 40.2, 19.3 ppm. HRMS (ESI) *m/z*: [M+H]<sup>+</sup> Calcd. for C<sub>27</sub>H<sub>30</sub>N<sub>2</sub>O<sub>2</sub> 414.2307; Found 414.2302.

### 9-methoxy-*N*<sup>2</sup>,*N*<sup>2</sup>,*N*<sup>7</sup>,*N*<sup>7</sup>-tetramethyl-10-(*o*-tolyl)anthracene-2,7-diamine (**3b**)

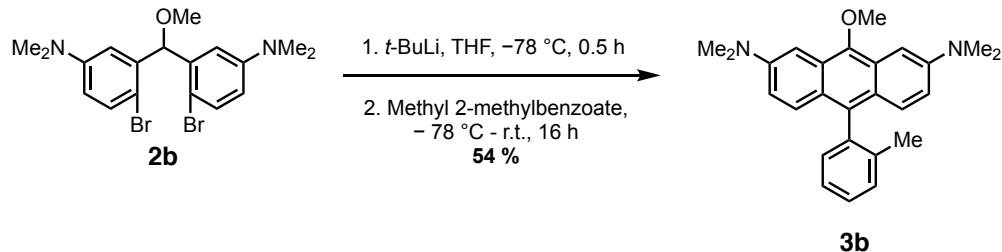

To 3,3'-(methoxymethylene)bis(4-bromo-*N,N*-dimethylaniline) **2b** (200 mg, 0.45 mmol, 1.0 eq.) in a flame-dried crimped 25mL microwave vial under an Ar atmosphere, THF (10 mL, 0.045 M) was added. The solution was stirred at room temperature before cooling to -78 °C in a dry ice/acetone bath. The solution was then treated with *tert*-Butyllithium solution (1.2 mL, 2.0 mmol, 4.4 eq.) and allowed stir at -78 °C for 0.5 h. A separately prepared solution of methyl 2-methylbenzoate (140 μL, 1.0 mmol, 2.2 eq.) in THF (5 mL, 0.2 M) under an Ar atmosphere was then added dropwise to the -78 °C reaction mixture. The reaction mixture was allowed stir for 1 hour at -78 °C before removal from the cold bath, covering with aluminum foil and allowing to gradually equilibrate to room temperature overnight for a total reaction time of 16 hours. The reaction mixture was then quenched at -78 °C with an excess of NH<sub>4</sub>Cl(sat.), and transferred to a separatory funnel with additional H<sub>2</sub>O used to dissolve any salts present. The crude mixture was extracted with EtOAc × 2 with the organic phase then washed with brine × 2, dried over Na<sub>2</sub>SO<sub>4</sub>, filtered and evaporated to dryness *in vacuo*. The yellow residue was purified by normal-phase column chromatography (12 g silica gold column, 0 → 10% hexanes /EtOAc) to afford 9-methoxy-*N*<sup>2</sup>,*N*<sup>2</sup>,*N*<sup>7</sup>,*N*<sup>7</sup>-tetramethyl-10-(*o*-tolyl)anthracene-2,7-diamine (85 mg, 54 %) **3b** as a bright yellow solid.

<sup>1</sup>H NMR (400 MHz, CDCl<sub>3</sub>) δ 7.43 – 7.39 (m, 2H), 7.37 – 7.31 (m, 3H), 7.27 – 7.22 (m, 3H), 7.04 (dd, *J* = 9.5, 2.6 Hz, 2H), 4.17 (s, 3H), 3.11 (s, 12H), 1.91 (s, 3H); <sup>13</sup>C NMR (100 MHz, DMSO-*d*<sub>6</sub>) δ: δ 147.8, 146.8, 138.9, 138.2, 132.4, 131.6, 129.9, 128.2, 127.6, 126.2, 125.7, 123.7, 116.6, 98.3, 60.8, 41.0, 19.9 ppm. HRMS (ESI) *m/z*: [M+H]<sup>+</sup> Calcd. for C<sub>26</sub>H<sub>28</sub>N<sub>2</sub>O<sub>2</sub> 384.2202; Found 384.2196.

***N*-(7-(dimethylamino)-9-oxo-10-(*o*-tolyl)anthracen-2(9H)-ylidene)-*N*-methylmethanaminium (KR-1)**

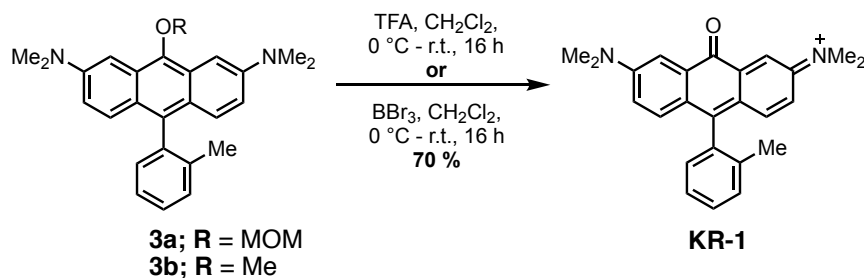

A solution of **3a** (10 mg, 0.024 mmol, 1.0 eq.) in CH<sub>2</sub>Cl<sub>2</sub> (2.4 mL, 0.01 M) or **3b** (10 mg, 0.026 mmol, 1.0 eq.) in CH<sub>2</sub>Cl<sub>2</sub> (2.6 mL, 0.01 M) in an oven-dried crimp vial under an Ar atmosphere were cooled to 0 °C in an ice bath. The solution was then treated with either trifluoroacetic acid (260 μL) or BBr<sub>3</sub> (0.52 mL, 0.52 mmol, 20 eq.). The resulting suspension was sonicated and set to stir at room temperature in the absence of light overnight. The reaction mixture was reduced to dryness under a stream of N<sub>2</sub> before resuspending in CH<sub>2</sub>Cl<sub>2</sub> (3 mL) with this process repeated a further two times. The concentrated product was suspended in CH<sub>2</sub>Cl<sub>2</sub> before adding NaHCO<sub>3</sub> (sat.). The crude mixture was extracted with CH<sub>2</sub>Cl<sub>2</sub> × 2 with the organic phase then washed with brine × 2, dried over Na<sub>2</sub>SO<sub>4</sub>, filtered and evaporated to dryness *in vacuo*. The dark brown residue was then purified by normal phase chromatography (4 g silica column, 0 → 15% MeOH/ CH<sub>2</sub>Cl<sub>2</sub>) to afford **KR-1** (6.2 mg, 70 %) as a brown black solid. Yield from **3b** = 5.9 mg, 62 %.

<sup>1</sup>H NMR (400 MHz, CDCl<sub>3</sub>) δ: 7.75 (d, *J* = 2.5 Hz, 2H), 7.45 (t, *J* = 7.5 Hz, 1H), 7.40 – 7.31 (m, 2H), 7.11 (d, *J* = 7.4 Hz, 1H), 7.03 – 6.88 (m, 4H), 3.52 (s, 12H), 2.11 (s, 3H); <sup>13</sup>C NMR (100 MHz, CDCl<sub>3</sub>) δ: 183.4, 164.8, 156.7, 138.5, 136.0, 135.0, 133.7, 130.9, 130.0, 129.0, 126.2, 124.0, 116.9, 116.6, 42.2, 19.9 ppm. HRMS (ESI) *m/z*: [M]<sup>+</sup> Calcd. for C<sub>25</sub>H<sub>25</sub>N<sub>2</sub>O<sup>+</sup> 369.1961; Found 369.1963.



## 2-(3,6-bis(dimethylamino)-10-(methoxymethoxy)anthracen-9-yl)benzoic acid (**4**)

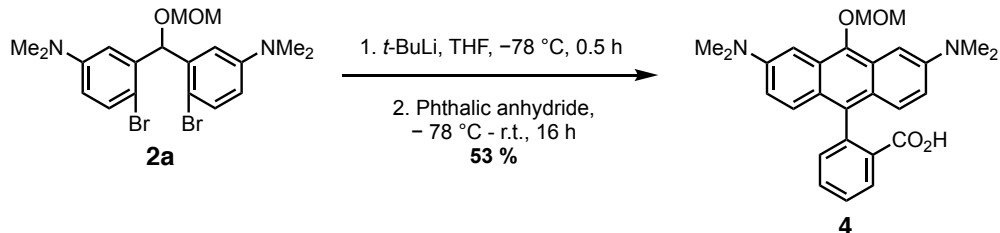

To 9-(methoxymethoxy)-*N*<sup>2</sup>,*N*<sup>2</sup>,*N*<sup>7</sup>,*N*<sup>7</sup>-tetramethyl-10-(*o*-tolyl)anthracene-2,7-diamine **2c** (300 mg, 0.64 mmol, 1.0 eq.) in a flame-dried crimped 25 mL microwave vial under an Ar atmosphere, THF (15 mL, 0.042 M) was added. The solution was stirred at room temperature before cooling to  $-78\text{ }^{\circ}\text{C}$  in a dry ice/ acetone bath. The solution was then treated with *tert*-Butyllithium solution (1.64 mL, 2.79 mmol, 4.4 eq.) and allowed stir at  $-78\text{ }^{\circ}\text{C}$  for 0.5 h. A separately prepared solution of phthalic anhydride (207 mg, 1.40 mmol, 2.2 eq.) in THF (5 mL, 0.28 M) under an Ar atmosphere was then added dropwise to the  $-78\text{ }^{\circ}\text{C}$  reaction mixture. The reaction mixture was allowed stir for 1 hour at  $-78\text{ }^{\circ}\text{C}$  before removal from the cold bath, covering with aluminum foil and allowing to gradually equilibrate to room temperature overnight for a total reaction time of 16 hours. The reaction mixture was then quenched at  $-78\text{ }^{\circ}\text{C}$  with an excess of  $\text{NH}_4\text{Cl}$ (sat.) and transferred to a separatory funnel with additional  $\text{H}_2\text{O}$  used to dissolve any salts present. The crude mixture was extracted with  $\text{EtOAc} \times 2$  with the organic phase then washed with brine  $\times 2$ , dried over  $\text{Na}_2\text{SO}_4$ , filtered and evaporated to dryness *in vacuo*. The yellow residue was purified by normal-phase column chromatography (24 g silica gold column, 0  $\rightarrow$  10%  $\text{CH}_2\text{Cl}_2$  /MeOH) to afford 2-(3,6-bis(dimethylamino)-10-(methoxymethoxy)anthracen-9-yl)benzoic acid **4** (282 mg, 53 %) as a bright yellow solid.

$^1\text{H}$  NMR (400 MHz,  $\text{DMSO-d}_6$ )  $\delta$  8.05 (dd,  $J = 7.7, 1.6$  Hz, 1H), 7.70 (td,  $J = 7.5, 1.6$  Hz, 1H), 7.63 (td,  $J = 7.6, 1.4$  Hz, 1H), 7.27 (dd,  $J = 7.5, 1.4$  Hz, 1H), 7.18 – 7.00 (m, 6H), 5.31 (s, 2H), 3.75 (s, 3H), 3.02 (s, 12H);  $^{13}\text{C}$  NMR (100 MHz,  $\text{DMSO-d}_6$ )  $\delta$  168.0, 147.4, 143.3, 138.9, 133.7, 132.6, 132.4, 131.3, 129.8, 127.8, 127.4, 126.2, 122.8, 116.4, 99.2, 97.6, 57.3, 40.3 ppm. HRMS (ESI)  $m/z$ :  $[\text{M}+\text{H}]^+$  Calcd. for  $\text{C}_{27}\text{H}_{28}\text{N}_2\text{O}_4$  444.2049; Found 444.2044.

### 3,6-bis(dimethylamino)-3'*H*,10*H*-spiro[anthracene-9,1'-isobenzofuran]-3',10-dione (KR-2)

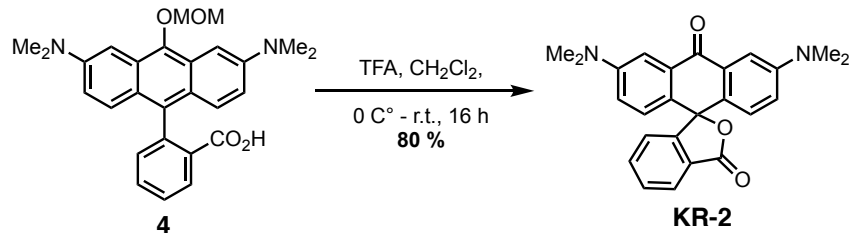

A solution of **4** (50 mg, 0.11 mmol, 1.0 eq.) in CH<sub>2</sub>Cl<sub>2</sub> (11 mL, 0.01 M) under an Ar atmosphere was cooled to 0 °C in an ice bath. The solution was then treated with trifluoroacetic acid (1.2 mL). The resulting suspension was sonicated and set to stir at room temperature in the absence of light overnight. The reaction mixture was reduced to dryness under a stream of N<sub>2</sub> before resuspending in CH<sub>2</sub>Cl<sub>2</sub> (10 mL) with this process repeated a further two times. The crude material was then suspended in CH<sub>2</sub>Cl<sub>2</sub> before adding NaHCO<sub>3</sub> (sat.). The crude mixture was extracted with CH<sub>2</sub>Cl<sub>2</sub> × 2 with the organic phase then washed with brine × 2, dried over Na<sub>2</sub>SO<sub>4</sub>, filtered and evaporated to dryness *in vacuo*. The dark brown residue was then purified by normal phase chromatography (12 g silica column, 0 → 5% MeOH/ CH<sub>2</sub>Cl<sub>2</sub>) to afford **KR-2** (36 mg, 80 %) as a yellow-orange solid.

<sup>1</sup>H NMR (500 MHz, CDCl<sub>3</sub>) δ: 8.03 – 7.95 (m, 1H), 7.60 (d, *J* = 2.9 Hz, 2H), 7.55 – 7.44 (m, 2H), 6.96 – 6.87 (m, 3H), 6.83 (dd, *J* = 8.8, 2.9 Hz, 2H), 3.02 (s, 12H); <sup>13</sup>C NMR (125 MHz, CDCl<sub>3</sub>) δ: 184.1, 171.2, 154.7, 150.7, 135.1, 131.9, 129.2, 128.0, 126.7, 125.6, 125.2, 122.8, 117.8, 109.4, 84.5, 40.4 ppm. HRMS (ESI) *m/z*: [M+H]<sup>+</sup> Calcd. for C<sub>25</sub>H<sub>22</sub>N<sub>2</sub>O<sub>3</sub> 398.1630; Found 398.1633 ppm.

**3-(2-(3,6-bis(dimethylamino)-10-(methoxymethoxy)anthracen-9-yl)-N-(3-(*tert*-butoxy)-3-oxopropyl)benzamido)propane-1-sulfonate (9)**

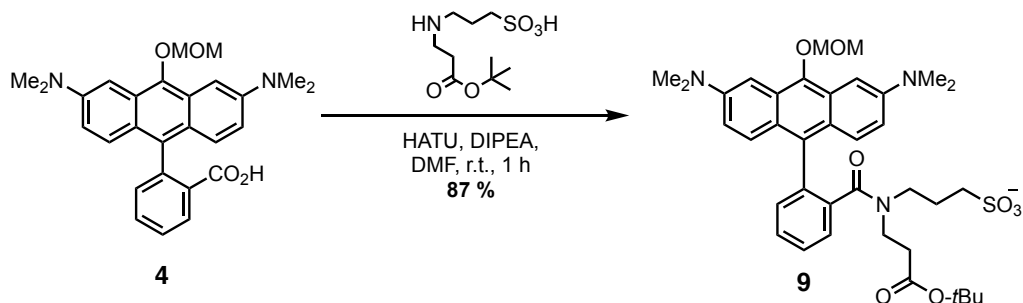

A solution of **4** (50 mg, 0.11 mmol, 1.0 eq.), HATU (130 mg, 0.34 mmol, 3.0 eq.) and *N,N*-diisopropylethylamine (59  $\mu$ L, 0.33 mmol, 3.0 eq.) in DMF (3 mL) under an Ar atmosphere was set to stir at room temperature. To the solution was then added 3-(3-(*tert*-butoxy)-3-oxopropyl)amino)propane-1-sulfonic acid (45 mg, 0.17 mmol, 1.5 eq.) and the reaction mixture was sonicated for 5 minutes before stirring at room temperature for 1 hour. The reaction mixture was then added to a separatory funnel containing of 4:1, EtOAc: Hexanes and  $\text{NH}_4\text{Cl}$  (sat.). Once extracted the separatory funnel was allowed to rest for 15-20 minutes to aid separation. This process was repeated until minimal crude material was detected in the organic layer by TLC. The organic layers were then combined and washed with brine  $\times$  2, dried over  $\text{Na}_2\text{SO}_4$ , filtered and evaporated to dryness *in vacuo*. The residue was purified by normal-phase column chromatography (12 g silica gold column, 0  $\rightarrow$  10%  $\text{CH}_2\text{Cl}_2$  /MeOH) to afford 3-(2-(3,6-bis(dimethylamino)-10-(methoxymethoxy)anthracen-9-yl)-N-(3-(*tert*-butoxy)-3-oxopropyl)benzamido)propane-1-sulfonate **9** (68 mg, 87 %) as a bright yellow solid.

$^1\text{H}$  NMR (500 MHz,  $\text{DMSO-}d_6$ )  $\delta$  7.68 – 7.56 (m, 2H), 7.55 – 7.41 (m, 1H), 7.41 – 7.35 (m, 1H), 7.33 – 7.19 (m, 2H), 7.16 – 6.99 (m, 4H), 5.28 (s, 2H), 3.74 (s, 3H), 3.03 (s, 12H), 2.92 (t,  $J$  = 7.6 Hz, 1H), 2.16 (br. s, 2H), 1.53 (br. s, 2H), 1.32 (d,  $J$  = 42.6 Hz, 9H), 0.97 (t,  $J$  = 8.1 Hz, 2H);  $^{13}\text{C}$  NMR (125 MHz,  $\text{DMSO-}d_6$ )  $\delta$  170.1, 168.8, 147.4, 143.5, 138.2, 135.7, 132.2, 132.0, 129.7, 128.6, 127.8, 126.5, 126.1, 116.0, 99.2, 97.3, 79.7, 57.3, 48.4, 44.4, 40.3, 34.0, 30.8, 27.6, 24.3 ppm. HRMS (ESI)  $m/z$ :  $[\text{M}+\text{H}]^+$  Calcd. for  $\text{C}_{37}\text{H}_{47}\text{N}_3\text{O}_8\text{S}$  693.3084; Found 693.3081.

**3-(*N*-(2-carboxyethyl)-2-(6-(dimethylamino)-3-(dimethyliminio)-10-oxo-3,10-dihydroanthracen-9-yl)benzamido)propane-1-sulfonate (KR-3)**

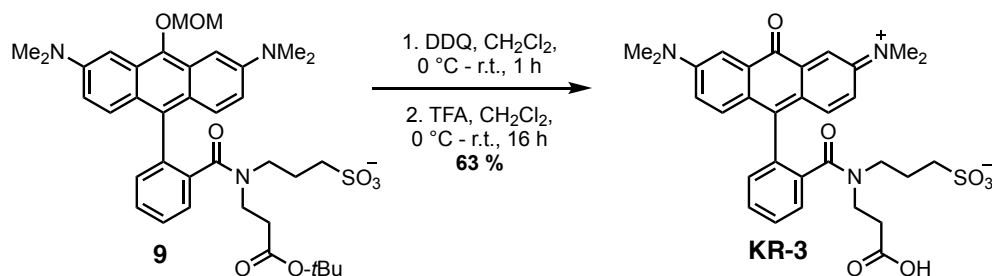

To solution of **9** (66 mg, 0.096 mmol, 1.0 eq.) in CH<sub>2</sub>Cl<sub>2</sub> (9.5 mL, 0.01 M) under an Ar atmosphere was added DDQ (24 mg, 0.1057 mmol, 1.1 eq.). The reaction mixture was stirred at room temperature for 1 hour before addition of NaHCO<sub>3</sub> (sat.). The crude mixture was extracted with CH<sub>2</sub>Cl<sub>2</sub> × 2 with the organic phase then washed with brine × 2, dried over Na<sub>2</sub>SO<sub>4</sub>, filtered and evaporated to dryness *in vacuo*. The residue was then purified by normal phase chromatography (12 g silica column, 0 → 10% CH<sub>2</sub>Cl<sub>2</sub> /MeOH) to afford 3-(*N*-(3-(*tert*-butoxy)-3-oxopropyl)-2-(6-(dimethylamino)-3-(dimethyliminio)-10-oxo-3,10-dihydroanthracen-9-yl)benzamido)propane-1-sulfonate **12** (40.8 mg, 91 %) as a dark brown solid.

To a solution of **12** (110 mg, 0.17 mmol, 1.0 eq.) in CH<sub>2</sub>Cl<sub>2</sub> (15.3 mL, 0.01 M) under an Ar atmosphere was cooled to 0 °C in an ice bath. The solution was then treated with trifluoroacetic acid (1.7 mL). The resulting solution was sonicated and set to stir at room temperature in the absence of light for 16 hours. The reaction mixture was reduced to dryness under a stream on N<sub>2</sub> before resuspending in CH<sub>2</sub>Cl<sub>2</sub> (15 mL) with this process repeated a further two times before drying under high vacuum to afford **KR-3** (138 mg) as a crude TFA salt. The residue could be further purified by reverse-phase chromatography (C18 20 × 150mm, dimensions: 21 mm x 250 mm 10 μm, 0 → 50 % H<sub>2</sub>O /CH<sub>3</sub>CN) to afford **KR-3** (68 mg, 63 %) as a brown-black solid.

<sup>1</sup>H NMR (400 MHz, MeOD/ TFA-*d*) δ 7.81 (dd, *J* = 9.5, 2.8 Hz, 1H), 7.76 – 7.53 (m, 3H), 7.46 (ddd, *J* = 14.8, 6.0, 2.8 Hz, 1H), 7.08 (dd, *J* = 19.4, 9.4 Hz, 2H), 6.89 (dd, *J* = 20.8, 9.3 Hz, 2H), 3.53 – 3.47 (m, 1H), 3.41 (s, 12H), 2.65 (t, *J* = 7.2 Hz, 1H), 2.54 (t, *J* = 7.4 Hz, 1H), 2.45 – 2.31 (m, 1H), 2.14 (t, *J* = 6.5 Hz, 1H), 2.06 – 1.84 (m, 1H), 1.70 – 1.46 (m, 1H) ppm. HRMS (ESI) *m/z*: [M]<sup>+</sup> Calcd. for C<sub>31</sub>H<sub>33</sub>N<sub>3</sub>O<sub>7</sub>S<sup>+</sup> 592.2112; Found 592.2256.

**Methyl 2-(10-((*tert*-butyldimethylsilyl)oxy)-3,6-bis(dimethylamino)anthracen-9-yl)acetate (10)**

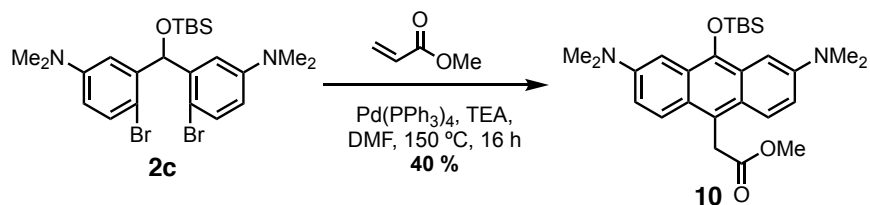

To 3,3'-(((*tert*-butyldimethylsilyl)oxy)methylene)bis(4-bromo-*N,N*-dimethylaniline) (50 mg, 0.092 mol, 1.0 eq.), Pd(PPh<sub>3</sub>)<sub>4</sub> (5.3 mg, 0.0046 mol, 0.05 eq.) and triethylamine (65  $\mu$ L, 0.46 mmol, 5.0 eq.) in a flame dried, Ar flushed 1 dram vial was added DMF (190  $\mu$ L, 0.5 M). The reaction was set to stir at room temperature for 5 minutes before the addition of methyl acrylate (12.5  $\mu$ L, 0.0138 mmol, 1.5 eq.). The vial was flushed with Ar, sealed carefully with parafilm and black electrical tape and heated to 150 °C overnight in the absence of light. Once at room temperature the crude reaction mixture was diluted with EtOAc and passed through a celite plug eluting with additional EtOAc. The eluant was transferred to a separatory funnel and washed with NaHCO<sub>3</sub> (sat.). The aqueous phase was extracted with EtOAc  $\times$  2 with the organic phase then washed with brine  $\times$  2, dried over Na<sub>2</sub>SO<sub>4</sub>, filtered and evaporated to dryness *in vacuo*. The yellow residue was purified by normal-phase column chromatography (4 g silica, 0  $\rightarrow$  10% hexanes /EtOAc) to afford methyl 2-(10-((*tert*-butyldimethylsilyl)oxy)-3,6-bis(dimethylamino)anthracen-9-yl)acetate (35 mg, 40 %) **10** as a bright yellow solid.

<sup>1</sup>H NMR (400 MHz, DMSO-*d*<sub>6</sub>)  $\delta$ : 8.01 (d, *J* = 9.6 Hz, 2H), 7.26 (dd, *J* = 9.6, 2.7 Hz, 2H), 6.98 (d, *J* = 2.6 Hz, 2H), 4.48 (s, 2H), 3.58 (s, 3H), 3.03 (s, 12H), 1.13 (s, 9H), 0.21 (s, 6H); <sup>13</sup>C NMR (100 MHz, DMSO-*d*<sub>6</sub>)  $\delta$  171.9, 146.5, 141.1, 125.7, 124.8, 123.4, 119.5, 117.1, 99.2, 51.7, 40.4, 32.9, 25.9, 18.4, -2.6 ppm. HRMS (ESI) *m/z*: [M+H]<sup>+</sup> Calcd. for C<sub>27</sub>H<sub>38</sub>N<sub>2</sub>O<sub>3</sub>Si 466.2652; Found 466.2645.

### Methyl 2-(3,6-bis(dimethylamino)-10-oxoanthracen-9(10*H*)-ylidene)acetate (**11**)

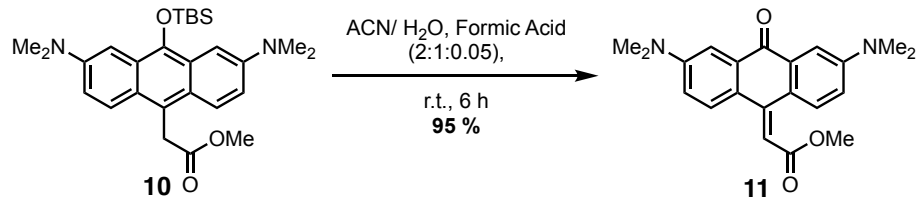

To **10** (10 mg, 0.021 mmol, 1.0 eq.) in a solution in 2:1 ACN/ H<sub>2</sub>O (3 mL) formic acid (150  $\mu$ L) was added. The reaction was set to stir at room temperature overnight. The solution was dried under vacuum to give methyl 2-(3,6-bis(dimethylamino)-10-oxoanthracen-9(10*H*)-ylidene)acetate **11** (7.1 mg, 95%) as a yellow-orange solid.

<sup>1</sup>H NMR (400 MHz, CD<sub>3</sub>CN)  $\delta$  7.81 (d,  $J$  = 8.9 Hz, 1H), 7.77 (d,  $J$  = 8.9 Hz, 1H), 7.38 (d,  $J$  = 2.9 Hz, 2H), 7.01 (dd,  $J$  = 8.9, 3.0 Hz, 1H), 6.93 (dd,  $J$  = 8.9, 3.0 Hz, 1H), 6.46 (s, 1H), 3.73 (s, 3H), 3.05 (d,  $J$  = 8.0 Hz, 12H); <sup>13</sup>C NMR (125 MHz, CDCl<sub>3</sub>)  $\delta$  185.8, 168.4, 151.2, 150.9, 143.5, 133.1, 132.1, 131.0, 127.5, 125.1, 122.6, 116.7, 114.7, 112.1, 109.0, 108.7, 51.7, 40.4, 40.3 ppm. HRMS (ESI)  $m/z$ : [M+H]<sup>+</sup> Calcd. for C<sub>21</sub>H<sub>22</sub>N<sub>2</sub>O<sub>3</sub> 350.1630; Found 350.1637.

***Tert*-butyl 2-(10-((*tert*-butyldimethylsilyl)oxy)-3,6-bis(dimethylamino)anthracen-9-yl)acetate (**5**)**

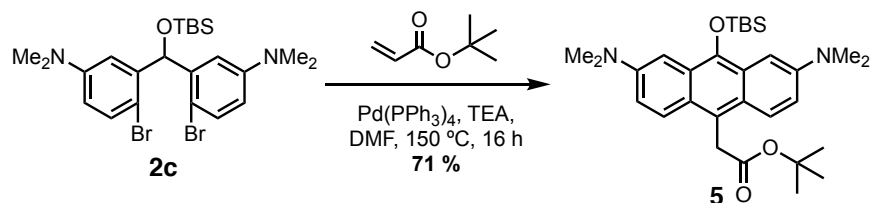

To 3,3'-(((*tert*-butyldimethylsilyl)oxy)methylene)bis(4-bromo-*N,N*-dimethylaniline) **2c** (200 mg, 0.37 mol, 1.0 eq.), Pd(PPh<sub>3</sub>)<sub>4</sub> (21 mg, 0.018 mol, 0.05 eq.) and triethylamine (260 μL, 1.8 mmol, 5.0 eq.) in a flame dried, Ar flushed 1 dram vial was added DMF (740 μL, 0.5 M). The reaction was set to stir at room temperature for 5 minutes before the addition of *tert*-butyl acrylate (82 μL, 0.55 mmol, 1.5 eq.). The vial was flushed with Ar, sealed carefully with parafilm and black electrical tape and heated to 150 °C overnight in the absence of light. Once at room temperature the crude reaction mixture was diluted with EtOAc and passed through a celite plug eluting with additional EtOAc. The eluant was transferred to a separatory funnel and washed with NaHCO<sub>3</sub> (sat.). The aqueous phase was extracted with EtOAc × 2 with the organic phase then washed with brine × 2, dried over Na<sub>2</sub>SO<sub>4</sub>, filtered and evaporated to dryness *in vacuo*. The yellow residue was purified by normal-phase column chromatography (12 g silica, 0 → 5% hexanes /EtOAc) to afford *tert*-butyl 2-(10-((*tert*-butyldimethylsilyl)oxy)-3,6-bis(dimethylamino)anthracen-9-yl)acetate **5** (130 mg, 71 %) as a bright yellow solid.

<sup>1</sup>H NMR (500 MHz, CD<sub>3</sub>CN) δ: 8.03 (d, *J* = 9.7 Hz, 2H), 7.26 (d, *J* = 2.6 Hz, 1H), 7.24 (d, *J* = 2.6 Hz, 1H), 7.10 (d, *J* = 2.6 Hz, 2H), 4.34 (s, 2H), 3.06 (s, 12H), 1.38 (s, 9H), 1.16 (s, 9H), 0.22 (s, 6H); <sup>13</sup>C NMR (126 MHz, CD<sub>3</sub>CN) δ: 172.1, 148.0, 142.7, 126.7, 126.3, 124.8, 121.0, 118.0, 100.9, 81.3, 41.2, 35.4, 28.2, 26.5, 19.4, - 2.2 ppm. HRMS (ESI) *m/z*: [M+H]<sup>+</sup> Calcd. for C<sub>30</sub>H<sub>44</sub>N<sub>2</sub>O<sub>3</sub>Si 508.3121; Found 508.3111.

**1-(3,6-bis(dimethylamino)-10-oxoanthracen-9(10H)-ylidene)-2-oxo-6,9,12,15,18-pentaoxa-3-azaicosan-20-oic acid (KR-4)**

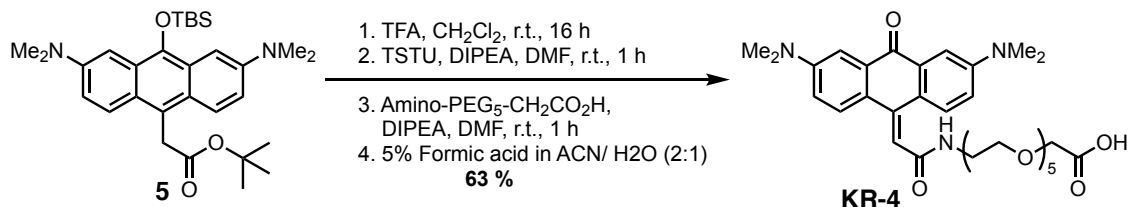

To *tert*-butyl 2-(10-((*tert*-butyldimethylsilyl)oxy)-3,6-bis(dimethylamino)anthracen-9-yl)acetate **5** (50 mg, 0.098 mmol, 1.0 eq.) in an Ar flushed round bottom flask CH<sub>2</sub>Cl<sub>2</sub> (9mL, 0.01M) was added and the solution was cooled to 0 °C in an ice-bath. To this TFA (1 mL) was added dropwise and the reaction mixture was stirred overnight wrapped in aluminum foil to exclude light. The reaction was reduced to dryness under a stream of N<sub>2</sub> before being redissolved in CH<sub>2</sub>Cl<sub>2</sub> (9mL) with this process being repeated for a total of 3 times. The residue was then suspended in EtOAc, transferred to a separatory funnel and washed with NaHCO<sub>3</sub> (sat.). The aqueous phase was extracted with EtOAc × 2 with the organic phase then washed with brine × 2, dried over Na<sub>2</sub>SO<sub>4</sub>, filtered and evaporated to dryness *in vacuo*. The yellow residue was used without purification.

To 2-(10-((*tert*-butyldimethylsilyl)oxy)-3,6-bis(dimethylamino)anthracen-9-yl)acetic acid (45 mg, 0.010 mmol, 1.0 eq.) and TSTU (60 mg, 0.20 mmol, 2.0 eq.) in an Ar flushed 1 dram vial was added DMF (0.5 mL). The reaction mixture was sonicated and set to stir at room temperature for 5 min before adding DIPEA (35 μL, 0.20 mmol, 2.0 eq.). After 1 hour the reaction mixture was added to a partition of EtOAc and 1M HCl in a separatory funnel, the organic layer was recovered and washed with brine × 2, dried over Na<sub>2</sub>SO<sub>4</sub>, filtered and evaporated to dryness *in vacuo*. The yellow residue was used without purification.

To 2,5-dioxopyrrolidin-1-yl 2-(10-((*tert*-butyldimethylsilyl)oxy)-3,6-bis(dimethylamino)anthracen-9-yl)acetate (54 mg, 0.098 mmol, 1 eq.) and Amino-PEG<sub>5</sub>-CH<sub>2</sub>CO<sub>2</sub>H (CAS: 141282-35-1) (35 mg, 0.17 mmol, 1.2 eq.) in an Ar flushed 1 dram vial was added DMF (1 mL, 0.1M). The reaction mixture was sonicated and set to stir at room temperature for 5 min before adding DIPEA (34 μL, 0.20 mmol, 2.0 eq.). After 1 hour the reaction mixture was dissolved in CH<sub>2</sub>Cl<sub>2</sub>, transferred to a separatory funnel and washed with NaHCO<sub>3</sub> (sat.). The aqueous phase was extracted with CH<sub>2</sub>Cl<sub>2</sub> × 2 and the organic phase then washed with brine × 2, dried over Na<sub>2</sub>SO<sub>4</sub>, filtered and evaporated to dryness *in vacuo*. The yellow residue was then dissolved in a 5% formic acid solution in 2:1 ACN/ H<sub>2</sub>O and stirred for 6 hours at room temperature. Upon drying *in vacuo* the residue was purified by normal-phase column chromatography (12 g silica gold column, 0 → 30 % CH<sub>2</sub>Cl<sub>2</sub> /MeOH) to afford 1-(3,6-bis(dimethylamino)-10-oxoanthracen-9(10H)-ylidene)-2-oxo-6,9,12,15,18-pentaoxa-3-azaicosan-20-oic acid **KR-4** (38 mg, 63 % over 4 steps) as a bright yellow solid.

<sup>1</sup>H NMR (400 MHz, CD<sub>3</sub>CN/ D<sub>2</sub>O; 9:1) δ: 7.80 (d, *J* = 9.0 Hz, 1H), 7.74 (d, *J* = 8.9 Hz, 1H), 7.36 (d, *J* = 3.0 Hz, 2H), 7.04 (dd, *J* = 8.9, 3.0 Hz, 1H), 6.95 (dd, *J* = 8.9, 3.0 Hz, 1H), 6.60 (s, 1H), 3.83 (s, 2H), 3.61 – 3.43 (m, 19H), 3.39 (t, *J* = 5.4 Hz, 2H), 3.00 (d, *J* = 2.9 Hz, 12H); <sup>13</sup>C NMR (100 MHz, CD<sub>3</sub>CN/ D<sub>2</sub>O; 9:1) δ: 186.4, 175.8, 170.7, 151.7, 151.7, 135.8, 133.3, 132.3,



130.5, 127.9, 126.0, 124.3, 119.5, 118.6, 117.0, 108.8, 108.7, 70.7, 70.5, 70.5, 70.4, 70.4, 70.3, 40.5, 40.4, 40.0 ppm. HRMS (ESI) m/z: [M+H]<sup>+</sup> Calcd. for C<sub>32</sub>H<sub>43</sub>N<sub>3</sub>O<sub>9</sub> 613.2999; Found 613.2988.

## Section S4: Retro-Brook Rearrangement Experiment and NMR Analysis

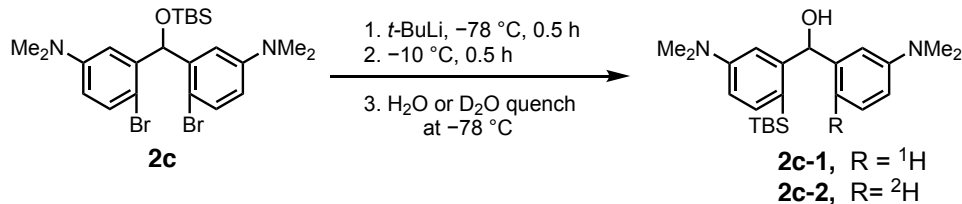

**Scheme S1:** Synthetic scheme of H<sub>2</sub>O/ D<sub>2</sub>O quench experiment with predicted products **2c-1** and **2c-2**.

To 3,3'-(((*tert*-butyldimethylsilyl)oxy)methylene)bis(4-bromo-*N,N*-dimethylaniline) **2c** (20 mg, 0.03687 mmol, 1.0 eq.) in a flame-dried crimped microwave vial under an Ar atmosphere, THF (1 mL) was added. The solution was stirred at room temperature before cooling to -78 °C in a dry ice/ acetone bath. The solution was then treated with *tert*-Butyllithium solution (95 μL, 0.01622 mmol, 4.4 eq.) and allowed stir at -78 °C for 0.5 h. The reaction mixture was stirred for an additional 0.5 h at -10 °C to ensure halogen-metal exchange. The reaction mixture was then quenched at -10 °C with an H<sub>2</sub>O (3 mL) or D<sub>2</sub>O (3 mL) and extracted with EtOAc × 2. The organic phase was washed with brine × 2, dried over Na<sub>2</sub>SO<sub>4</sub>, filtered and evaporated to dryness *in vacuo*. The resulting colorless oils **2c-1** and **2c-2** were used without further purification and submitted for <sup>1</sup>H NMR analysis in CD<sub>3</sub>CN. Additionally, to an NMR sample of H<sub>2</sub>O quench experiment **2c-1**, a few drops of MeOD were added and it was also analyzed <sup>1</sup>H NMR.

### A - Starting Material

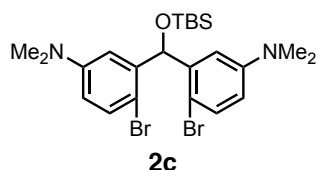

3,3'-(((*tert*-butyldimethylsilyl)oxy)methylene)bis(4-bromo-*N,N*-dimethylaniline) **2c**

<sup>1</sup>H NMR (400 MHz, CD<sub>3</sub>CN) δ: 7.30 (d, *J* = 8.8 Hz, 2H), 6.92 (d, *J* = 3.2 Hz, 2H), 6.57 (dd, *J* = 8.8, 3.2 Hz, 2H), 6.24 (s, 1H), 2.86 (s, 12H), 0.91 (s, 9H), 0.07 (s, 6H) ppm. HRMS (ESI) *m/z*: [M+H]<sup>+</sup> Calcd. for C<sub>23</sub>H<sub>34</sub>Br<sub>2</sub>N<sub>2</sub>O<sub>2</sub>Si 542.0787; Found 542.0790.

### B - H<sub>2</sub>O quench

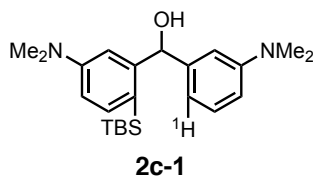

(2-(*tert*-butyldimethylsilyl)-5-(dimethylamino)phenyl)(3-(dimethylamino)phenyl-6-*H*)methanol **2c-1**

$^1\text{H}$  NMR (400 MHz,  $\text{CD}_3\text{CN}$ )  $\delta$ : 7.37 (dt,  $J = 8.4, 1.2$  Hz, 1H), 7.11 (t,  $J = 7.9$  Hz, 1H), 6.77 (s, 1H), 6.69 – 6.64 (m, 2H), 6.61 (dd,  $J = 8.2, 2.7$  Hz, 1H), 6.56 (d,  $J = 7.5$  Hz, 1H), 5.86 (d,  $J = 5.1$  Hz, 1H), 3.42 (d,  $J = 5.2$  Hz, 1H), 2.85 (d,  $J = 13.8$  Hz, 12H), 0.91 (s, 9H), 0.31 (d,  $J = 36.9$  Hz, 6H). HRMS (ESI)  $m/z$ :  $[\text{M}+\text{H}]^+$  Calcd. for  $\text{C}_{23}\text{H}_{35}^1\text{HN}_2\text{OSi}$  384.2597; Found 384.2272 ppm.

### C - $\text{D}_2\text{O}$ quench

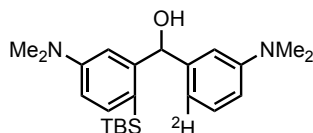

**2c-2**

(2-(*tert*-butyldimethylsilyl)-5-(dimethylamino)phenyl)(3-(dimethylamino)phenyl-6-*d*)methanol  
**2c-2**

$^1\text{H}$  NMR (400 MHz,  $\text{CD}_3\text{CN}$ )  $\delta$  7.37 (dt,  $J = 8.4, 1.2$  Hz, 1H), 7.11 (d,  $J = 8.2$  Hz, 1H), 6.77 (d,  $J = 2.6$  Hz, 1H), 6.69 – 6.64 (m, 2H), 6.61 (dd,  $J = 8.3, 2.7$  Hz, 1H), 5.86 (d,  $J = 5.2$  Hz, 1H), 3.41 (d,  $J = 5.2$  Hz, 1H), 2.85 (d,  $J = 13.5$  Hz, 12H), 0.91 (s, 8H), 0.31 (d,  $J = 37.0$  Hz, 6H) ppm.  
 $\text{C}_{23}\text{H}_{35}\text{DN}_2\text{OSi}$  385.2660; Found 385.2284.

### D - $^2\text{H}$ exchange experiment in MeOD

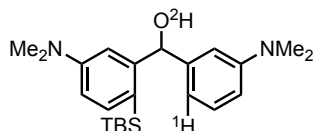

**2c-3**

(2-(*tert*-butyldimethylsilyl)-5-(dimethylamino)phenyl)(3-(dimethylamino)phenyl-6-*H*)methanol-*d*  
**2c-3**

$^1\text{H}$  NMR (400 MHz,  $\text{CD}_3\text{CN}$ )  $\delta$ : 7.45 – 7.29 (m, 1H), 7.10 (t,  $J = 7.9$  Hz, 1H), 6.77 (s, 1H), 6.68 – 6.64 (m, 2H), 6.61 (dd,  $J = 8.2, 2.7$  Hz, 1H), 6.56 (d,  $J = 7.3$  Hz, 1H), 5.85 (s, 1H), 2.84 (d,  $J = 12.4$  Hz, 12H), 0.90 (s, 9H), 0.30 (d,  $J = 38.6$  Hz, 6H) ppm.

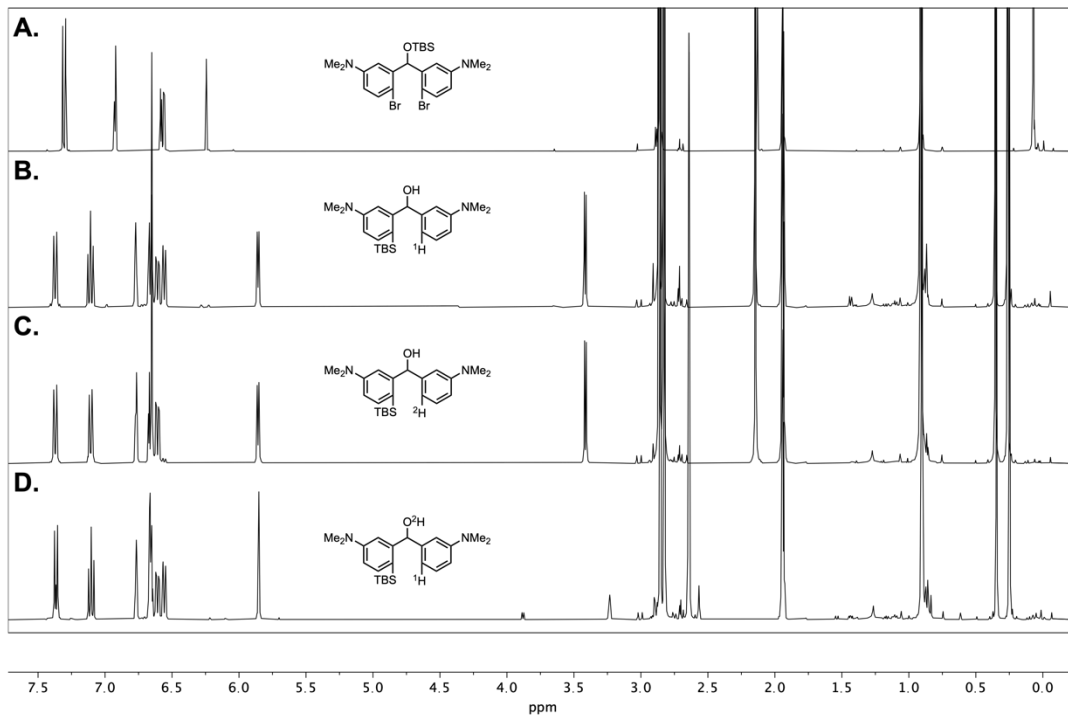

**Figure S2:** Stacked  $^1\text{H}$  NMR spectra of compounds **2c**, **2c-1**, **2c-2** and **2c-3** in  $\text{ACN-d}_3$ .

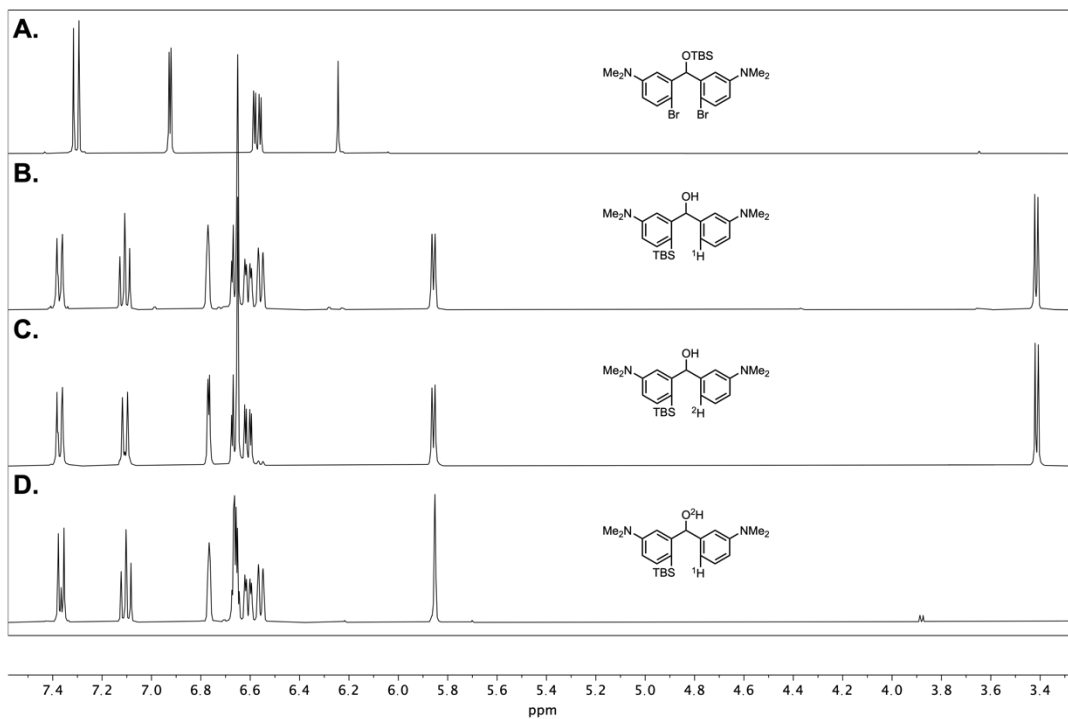

**Figure S3:** Stacked  $^1\text{H}$  NMR spectra of compounds **2c**, **2c-1**, **2c-2** and **2c-3** in  $\text{ACN-d}_3$  (zoom 7.5 - 3.3 ppm).

## Section S5: Photophysical Measurements

### Determination of molar absorption coefficients and fluorescence quantum yields.

All spectroscopic measurements were carried out in duplicate at room temperature using 10 mm × 10 mm quartz cuvettes (Hellma GmbH) and high-purity spectroscopic grade solvents. High purity water ( $\sigma < 55 \mu\text{S}$ ) was obtained using a MilliPore filter system. Dichloromethane ( $\text{CH}_2\text{Cl}_2$ ; anhydrous,  $\geq 99.8\%$ ), Dimethylsulfoxide (DMSO; for molecular biology) and Trifluoroacetic acid (TFA; HPLC grade) were purchased from Millipore Sigma. Phosphate buffered saline (PBS 1x; gibco) was purchased from Fisher Scientific. Acetate buffer (pH 3.6) was prepared by adding 0.099 g of Sodium Acetate (Millipore Sigma - 791741-500g) and 1.429 g of Acetic Acid (VWR - BDH3094-2.5LG) to 400 mL  $\text{H}_2\text{O}$  and adjusting the solution to pH 3.6 using HCl or NaOH before adding  $\text{H}_2\text{O}$  to a final volume of 500 mL in a volumetric flask,

The reference dyes IR140 was purchased from Lambda Physik and used to determine the fluorescence quantum yield of **KR-1** (see main body text).

Molar absorption coefficients ( $\epsilon$ ) at the respective absorbance maximum were determined using a PerkinElmer UV/Vis Photodiode Array Spectrophotometer Lambda 465 (Scan No. 30, Integration No. 1) in  $\text{CH}_2\text{Cl}_2$ , PBS (pH 7.4),  $\text{CH}_2\text{Cl}_2$  supplemented with 5 % TFA or acetate buffer at pH 3.6 using Beer's law, from plots of absorbance vs. concentration. Measurements were performed in 10 mm path length quartz cuvettes (Hellma 111-QS), maintained at 25 °C, with absorbance at the highest concentration  $\leq 0.20$ .

Fluorescence traces were recorded on a PTI QuantaMaster steady state spectrofluorometer operated by FelixGX 4.2.2 software, with 827 nm excitation, 15 nm excitation and 20 nm emission slit widths with a 1 nm step size, 1 s integration rate and a collection range of 855 nm - 1300 nm (organic solvent) or 855 nm - 1500 nm (aqueous solvent).

Previously measured KR-1 quantum yield value of 1.3 % in  $\text{CH}_2\text{Cl}_2$  was used as the internal standard (ST below) for all subsequent measurements which were determined using a relative method and calculated according to the following equation:

$$\Phi_x = \Phi_{ST} \left( \frac{(\text{Grad}_x)}{(\text{Grad}_{ST})} \right) \left( \frac{(n_x^2)}{(n_{ST}^2)} \right)$$

where  $\Phi$  is the fluorescence quantum yield, subscript x and ST denote the test and standard respectively, Grad is the gradient from the plot of the integrated intensity vs. absorbance at excitation wavelength (827 nm) and n is the refractive index of the solvent used.

All fluorescent measurements were manually background subtracted using fluorescent traces of the appropriate blank taken under identical conditions to that of the corresponding samples (827 nm excitation, 15 nm excitation and 20 nm emission slit widths with a 1 nm step size and 1 s integration rate).

**Figure 2, Panel D:** A 2mM stock of **KR-2** was prepared in DMSO. 10  $\mu$ M - 50  $\mu$ M samples (5 mL) were prepared in  $\text{CH}_2\text{Cl}_2$  supplemented with 5 % TFA and separately a 50  $\mu$ M sample of **KR-2** was prepared in  $\text{CH}_2\text{Cl}_2$  with all samples containing a final DMSO concentration of 2.5 %. All samples were vortexed and sonicated before allowing to equilibrate at ambient temperature in the absence of light before absorbance/ fluorescence measurements.

**Figure 2, Panel E:** A 10 mM stock of **KR-4** in DMSO was diluted to 250  $\mu$ M in PBS pH 7.4 (10 mL). This solution was adjusted from pH 7.4 to pH 3.5 using 0.1 M, 0.5 M and 1M NaOH/ HCl in decrements of pH 0.5. Once the desired pH was obtained a 200  $\mu$ L sample was removed and absorbance curve was generated using a Synergy Mx microplate reader (300 nm - 999nm, step size 5 nm).

**Figure 2, Panel F:**  $\text{pK}_a$  was determined by plotting the  $\lambda_{\text{max}}$  Abs (870 nm) vs. each pH value. Sigmoidal plot fit resulted in apparent  $\text{pK}_a = 4.4$ .

## Section S6: $^1\text{H}$ , $^{13}\text{C}$ and Associated 2D NMR Spectra

$^1\text{H}$  (400 MHz) and  $^{13}\text{C}$  (100 MHz) NMR spectra of bis(3-(dimethylamino)phenyl)methanone (1)

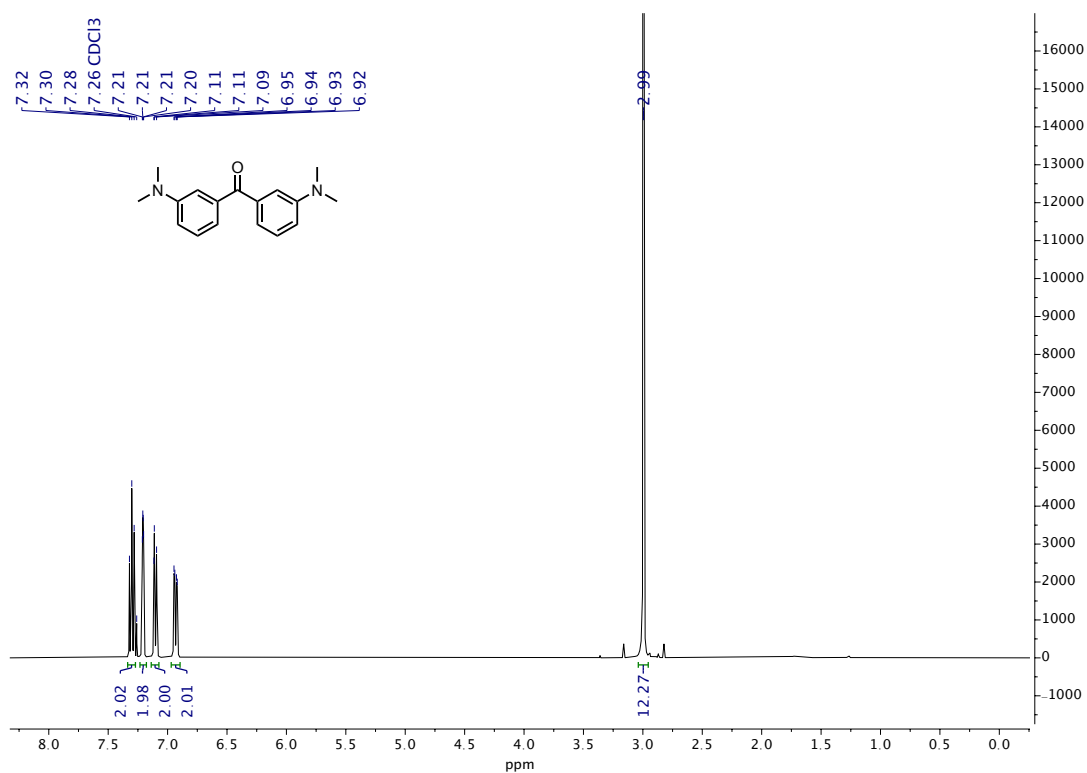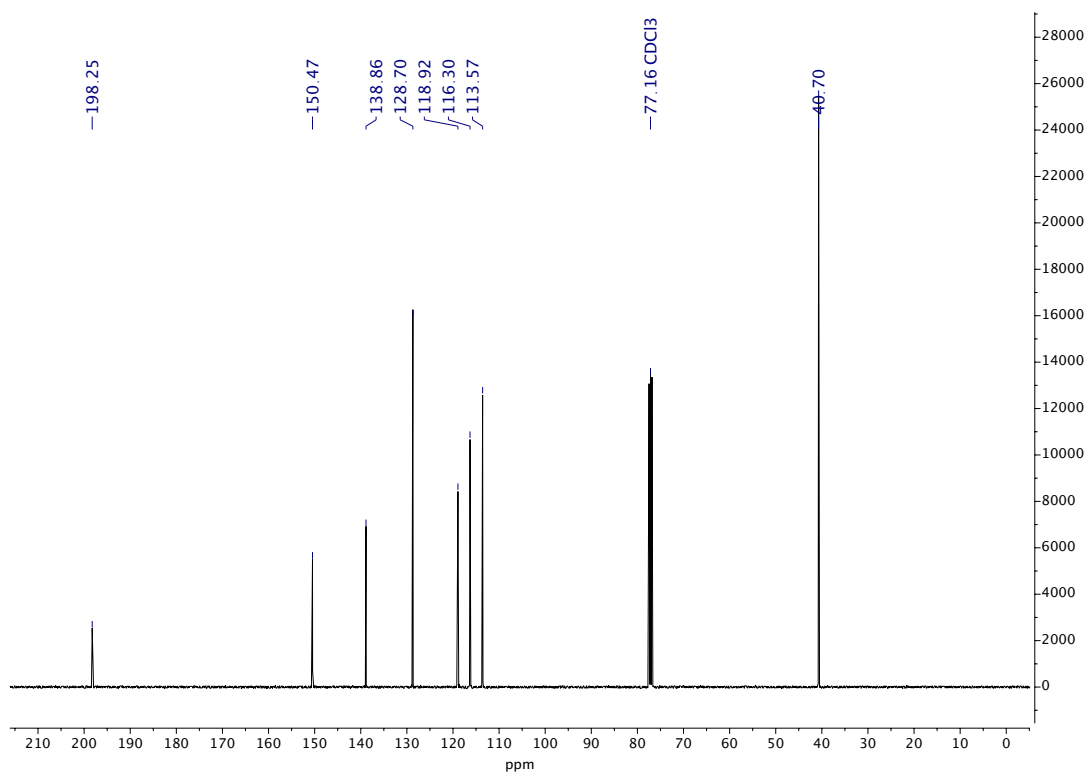

$^1\text{H}$  (400 MHz) and  $^{13}\text{C}$  (100 MHz) NMR spectra of bis(2-bromo-5-(dimethylamino)phenyl)methanone (7)

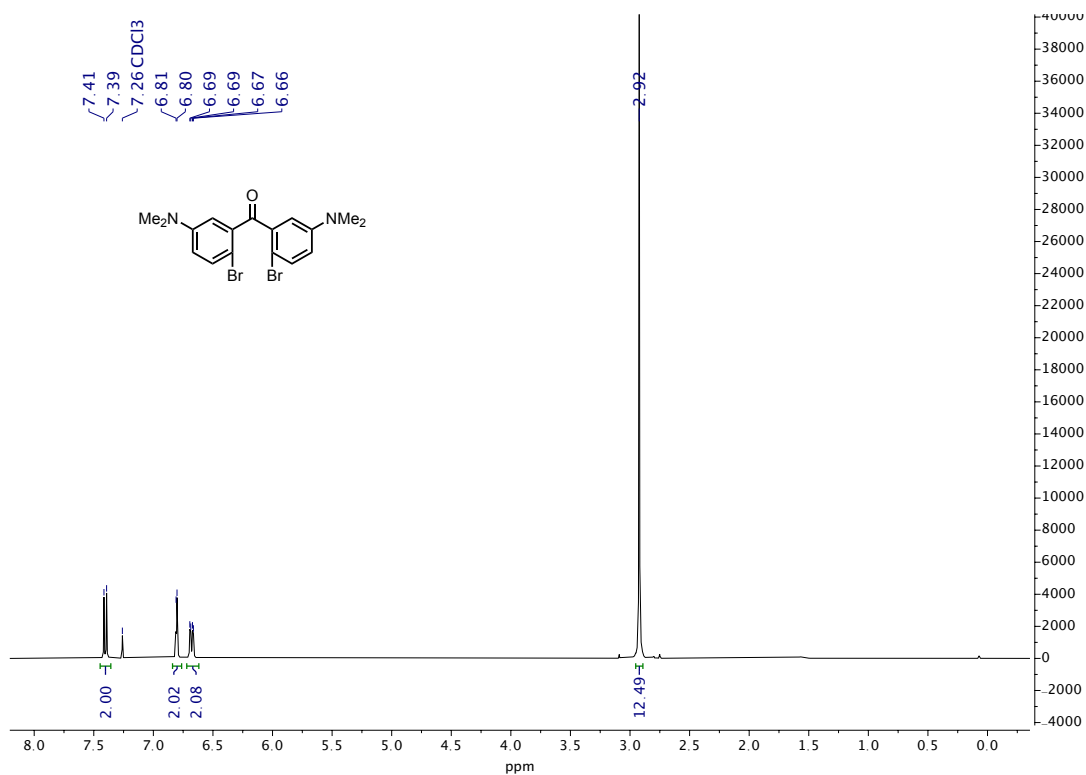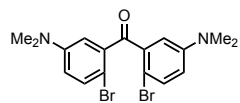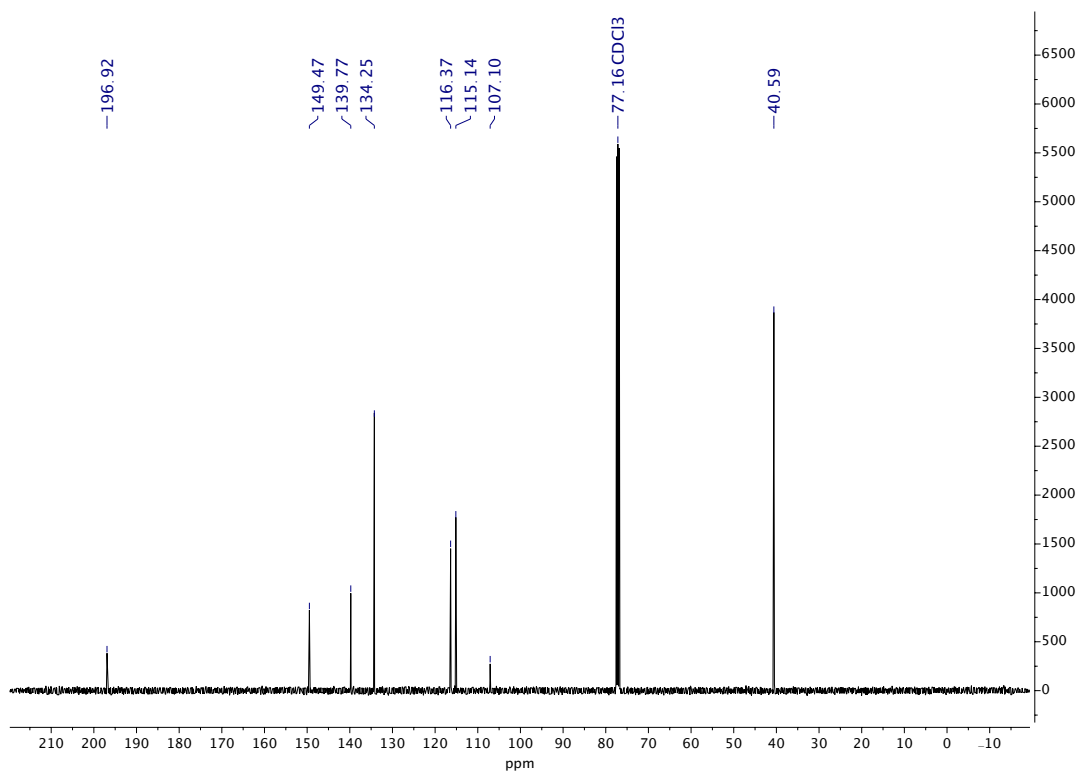



$^1\text{H}$  (400 MHz) and  $^{13}\text{C}$  (100 MHz) NMR spectra of **bis(2-bromo-5-(dimethylamino)phenyl)methanol (12)**

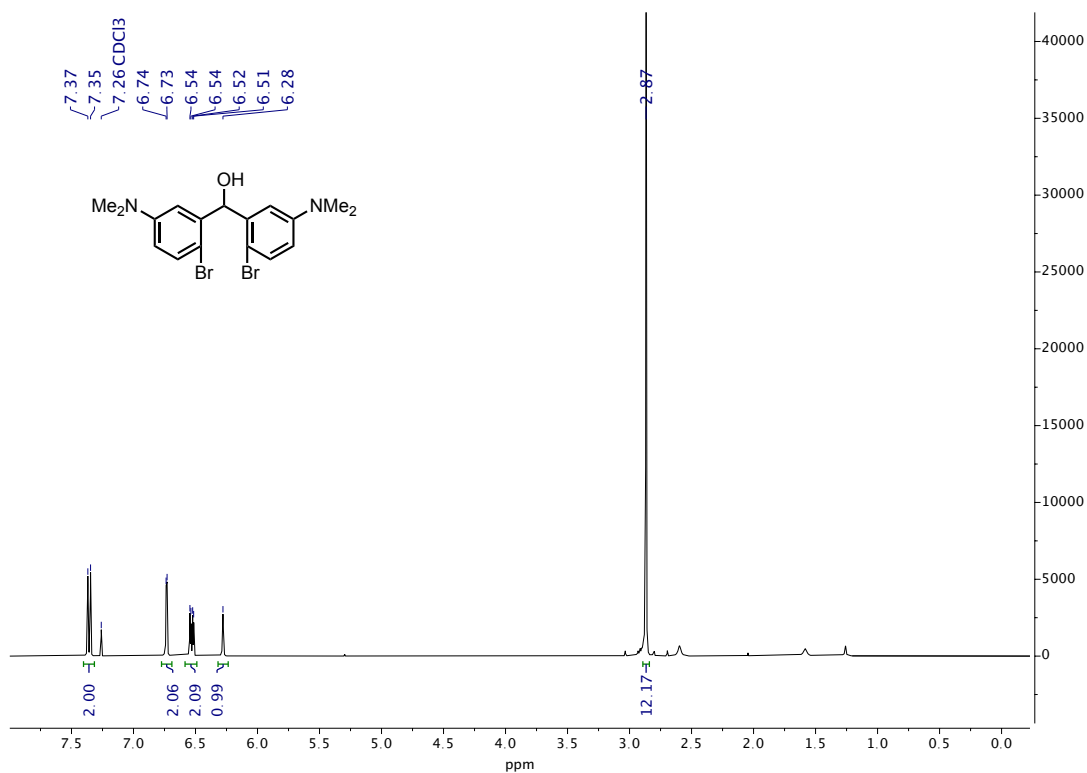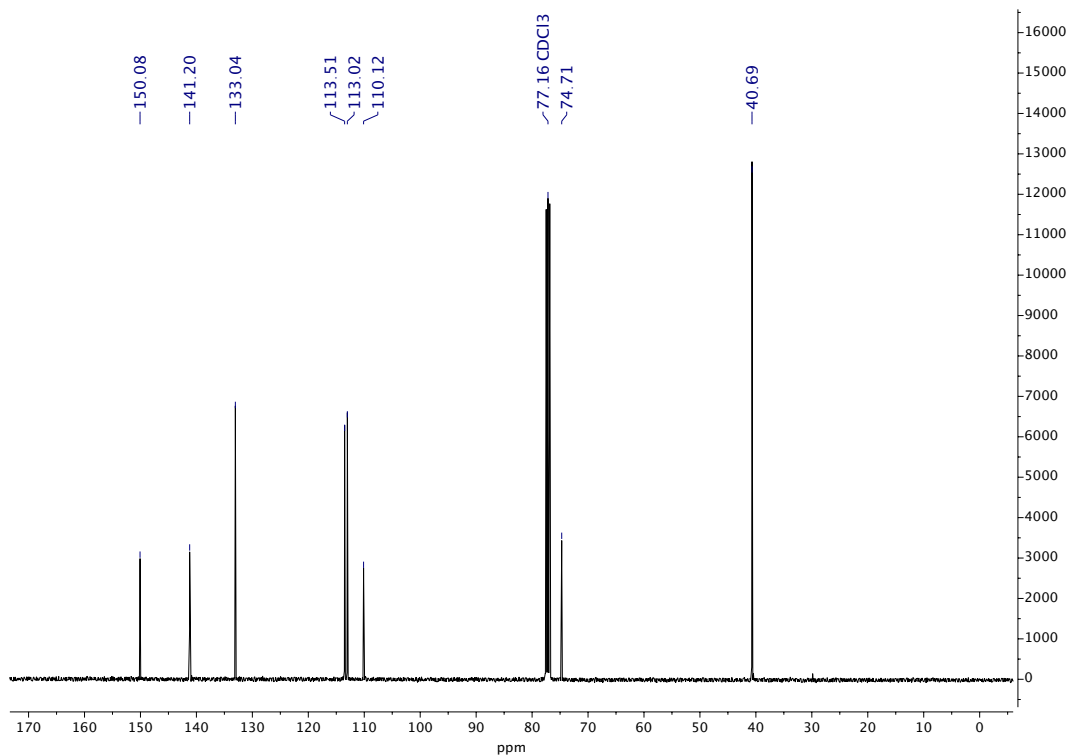

$^1\text{H}$  (400 MHz) and  $^{13}\text{C}$  (100 MHz) NMR spectra of 3,3'-((methoxymethoxy)methylene)bis(4-bromo-*N,N*-dimethylaniline) (2a)

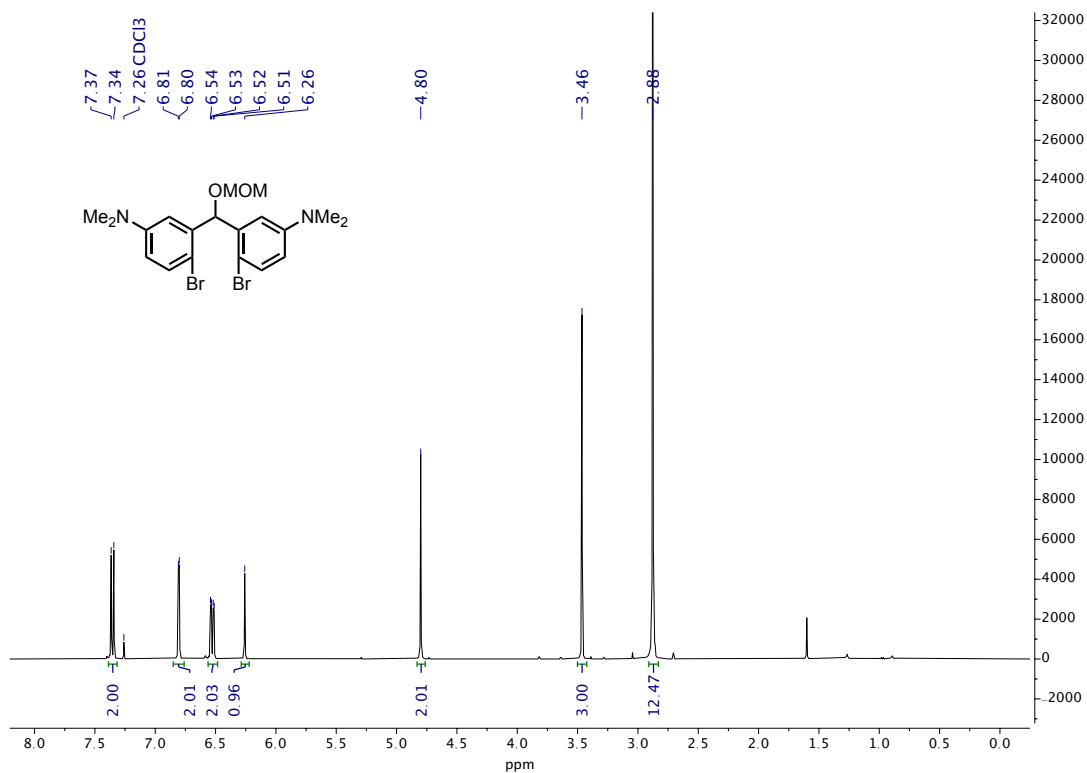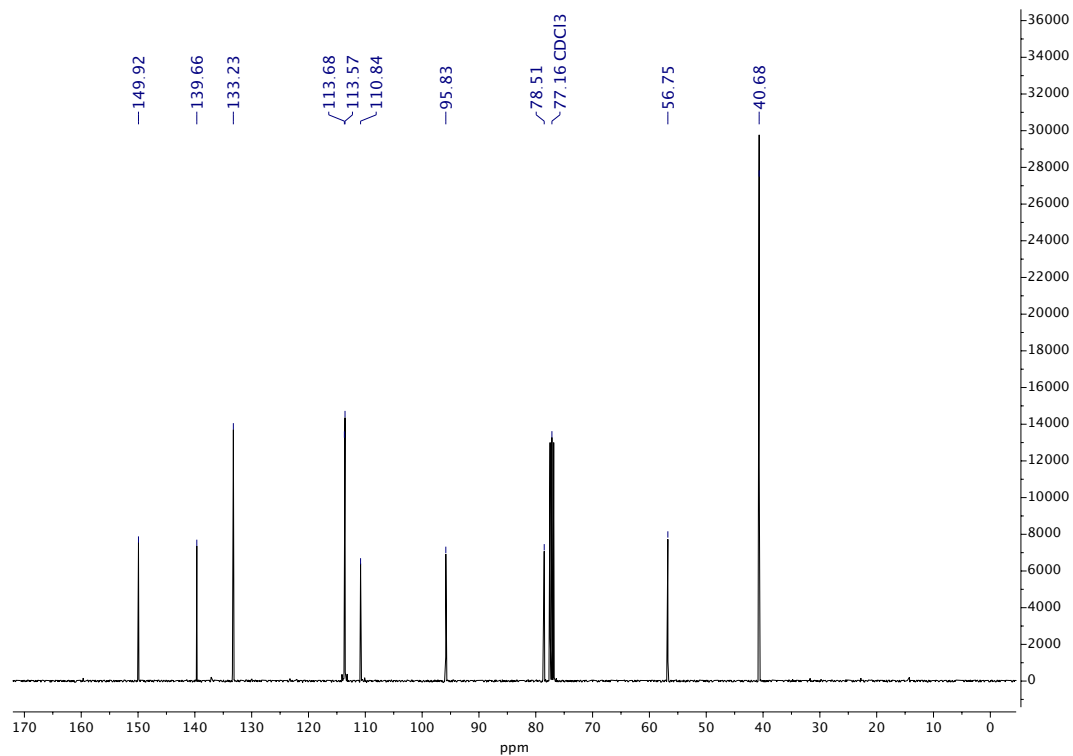

$^1\text{H}$  (400 MHz) and  $^{13}\text{C}$  (100 MHz) NMR spectra of  
**3,3'-(methoxymethylene)bis(4-bromo-*N,N*-dimethylaniline) (2b)**

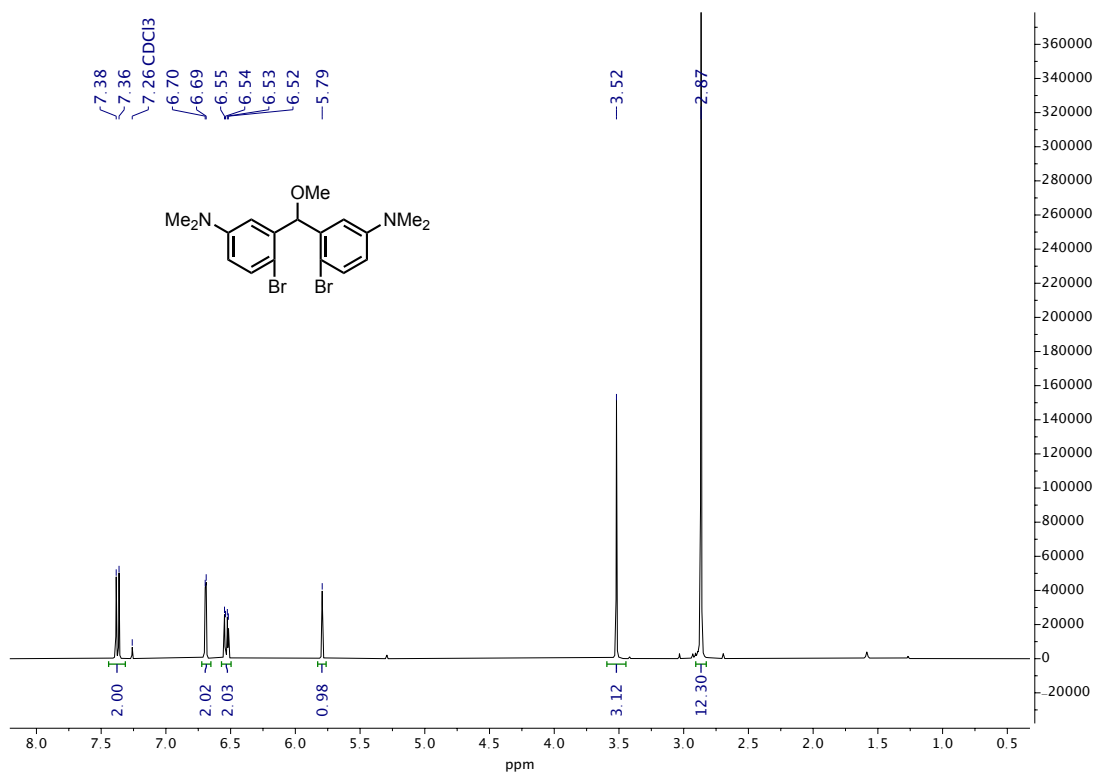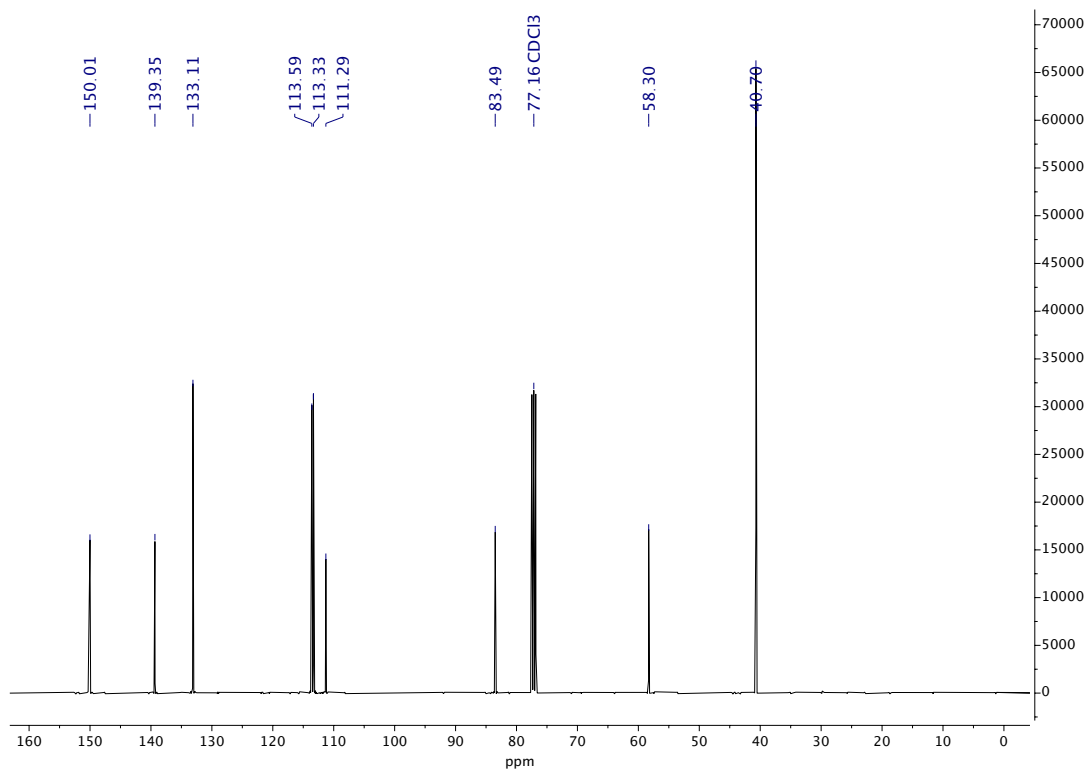

$^1\text{H}$  (400 MHz) and  $^{13}\text{C}$  (100 MHz) NMR spectra of 3,3'-(((*tert*-butyldimethylsilyl)oxy)methylene)bis(4-bromo-*N,N*-dimethylaniline) (2c)

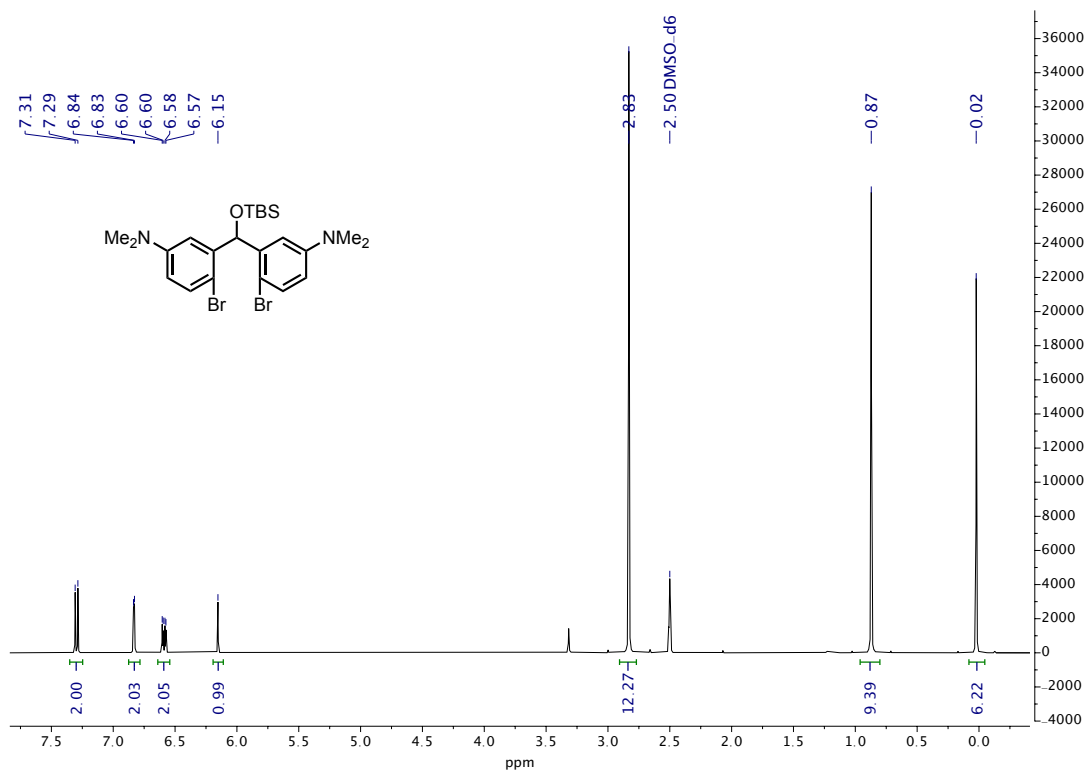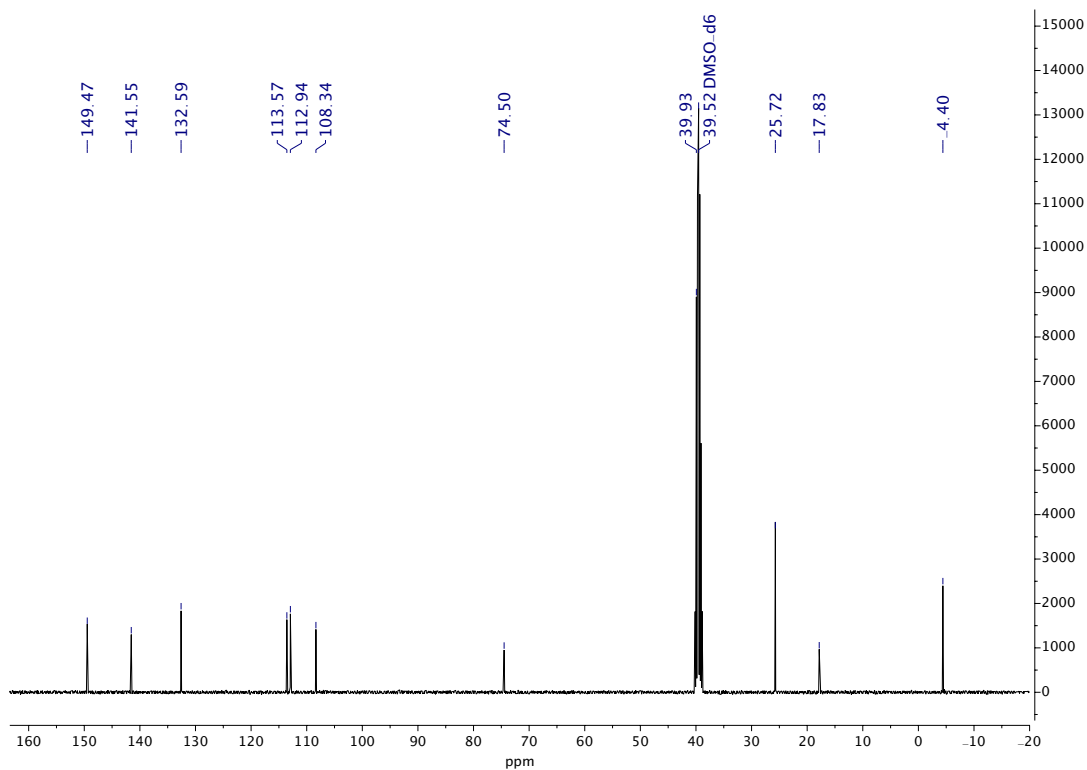

$^1\text{H}$  (400 MHz) and  $^{13}\text{C}$  (100 MHz) NMR spectra of **9-(methoxymethoxy)-N2,N2,N7,N7-tetramethyl-10-(o-tolyl)anthracene-2,7-diamine (3a)**

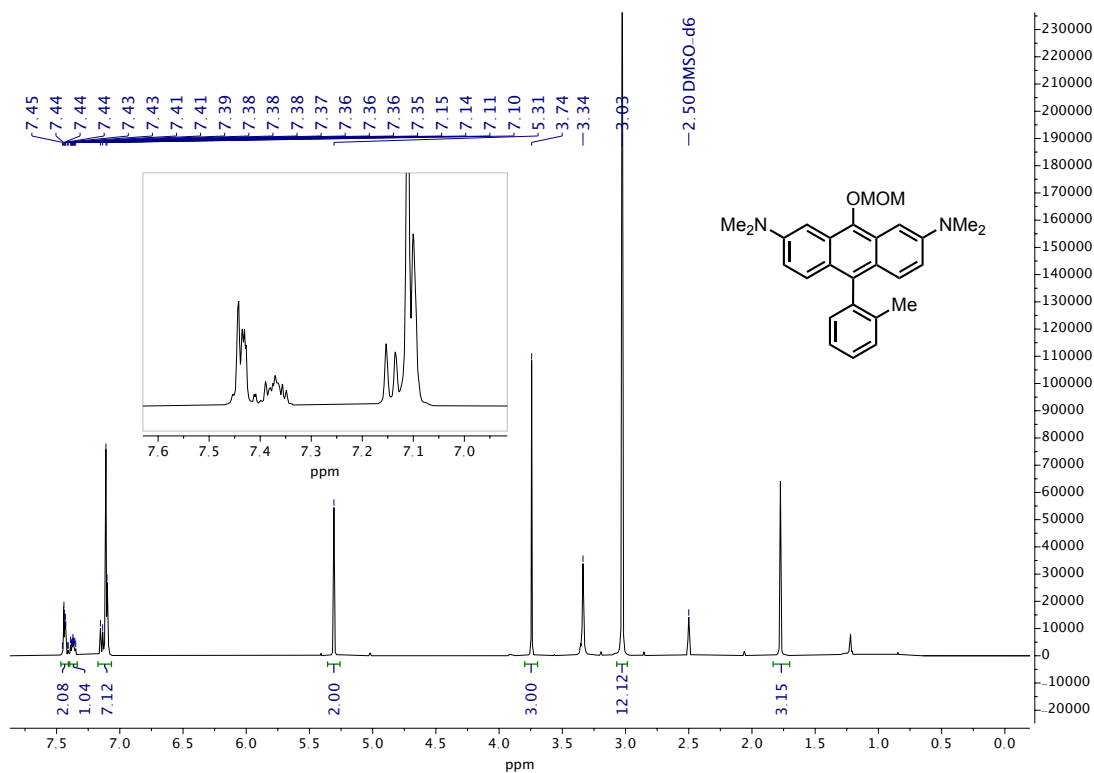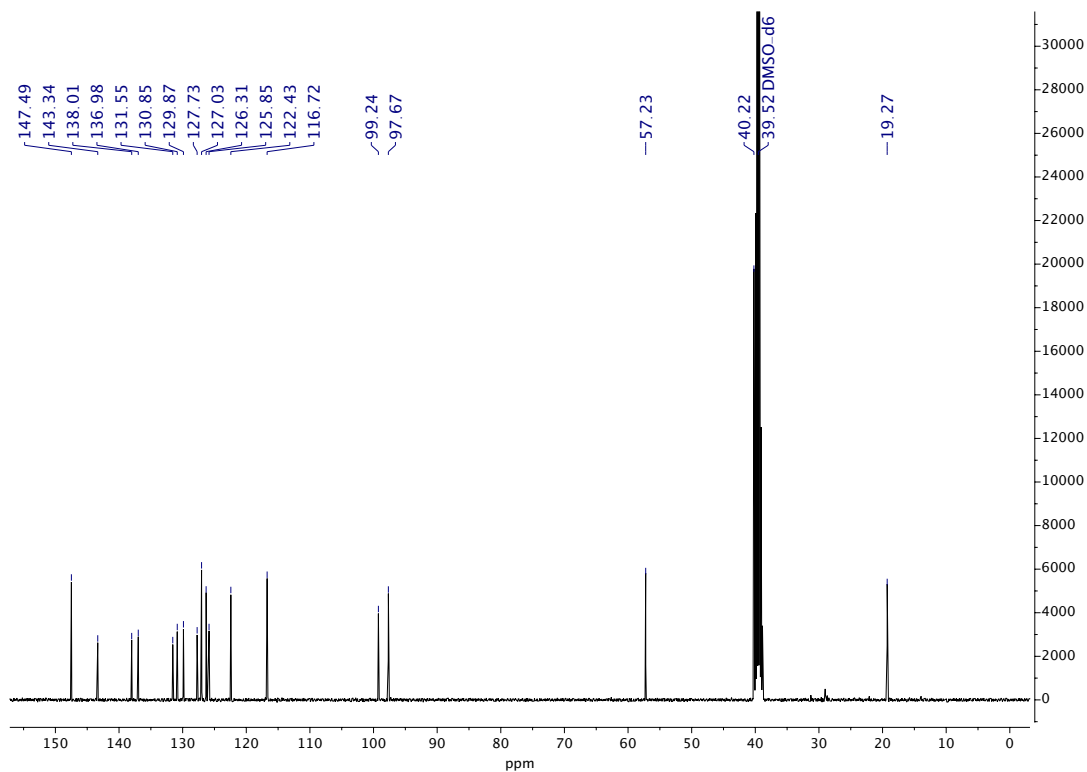

$^1\text{H}$  (400 MHz) and  $^{13}\text{C}$  (100 MHz) NMR spectra of **9-methoxy-*N*<sup>2</sup>,*N*<sup>2</sup>,*N*<sup>7</sup>,*N*<sup>7</sup>-tetramethyl-10-(*o*-tolyl)anthracene-2,7-diamine (3b)**

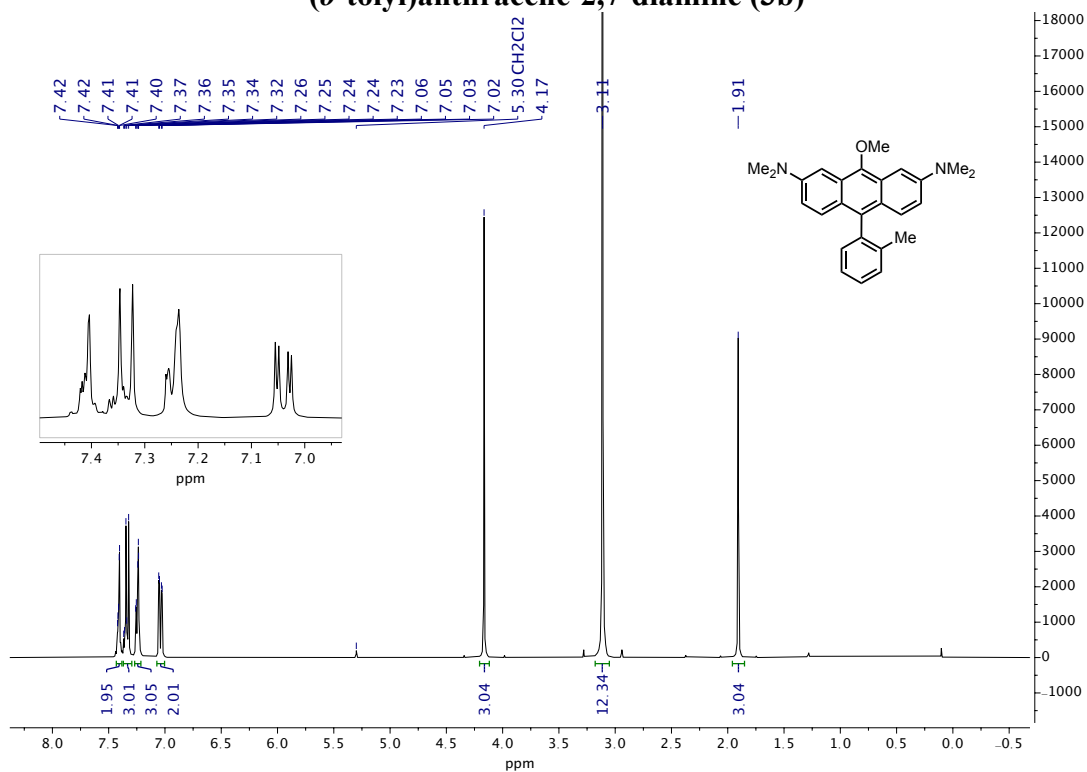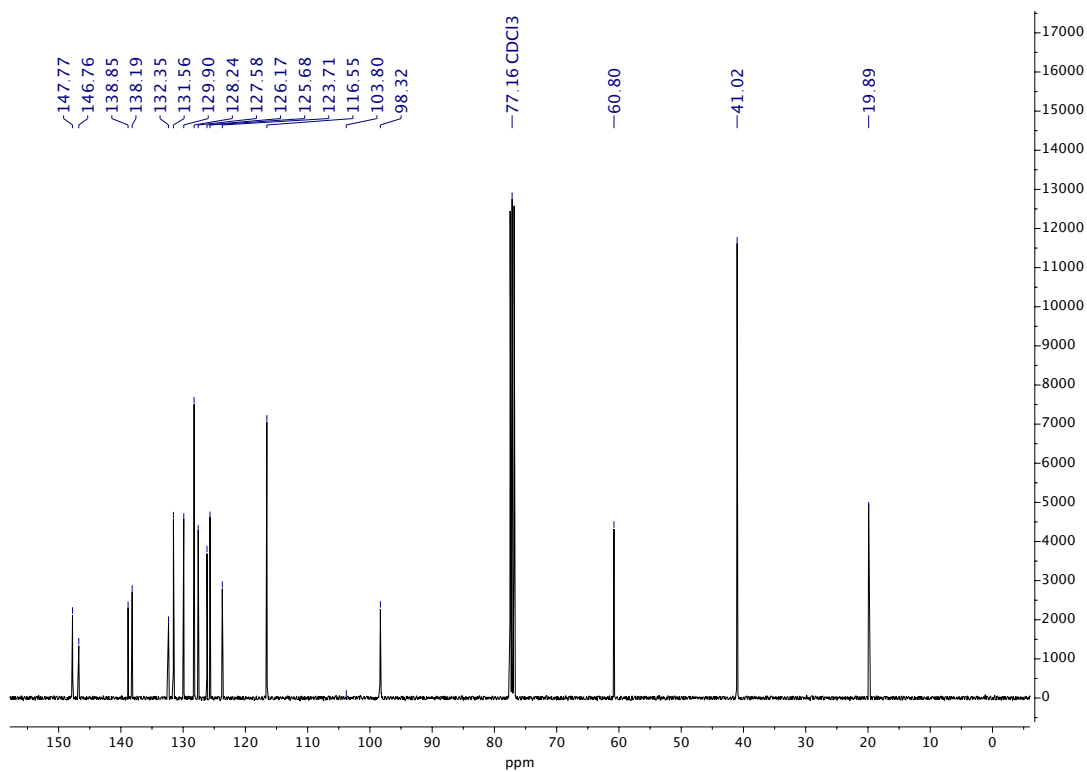

<sup>1</sup>H (400 MHz) and <sup>13</sup>C (100 MHz) NMR spectra of *N*-(7-(dimethylamino)-9-oxo-10-(*o*-tolyl)anthracen-2(9*H*)-ylidene)-*N*-methylmethanaminium (KR-1)

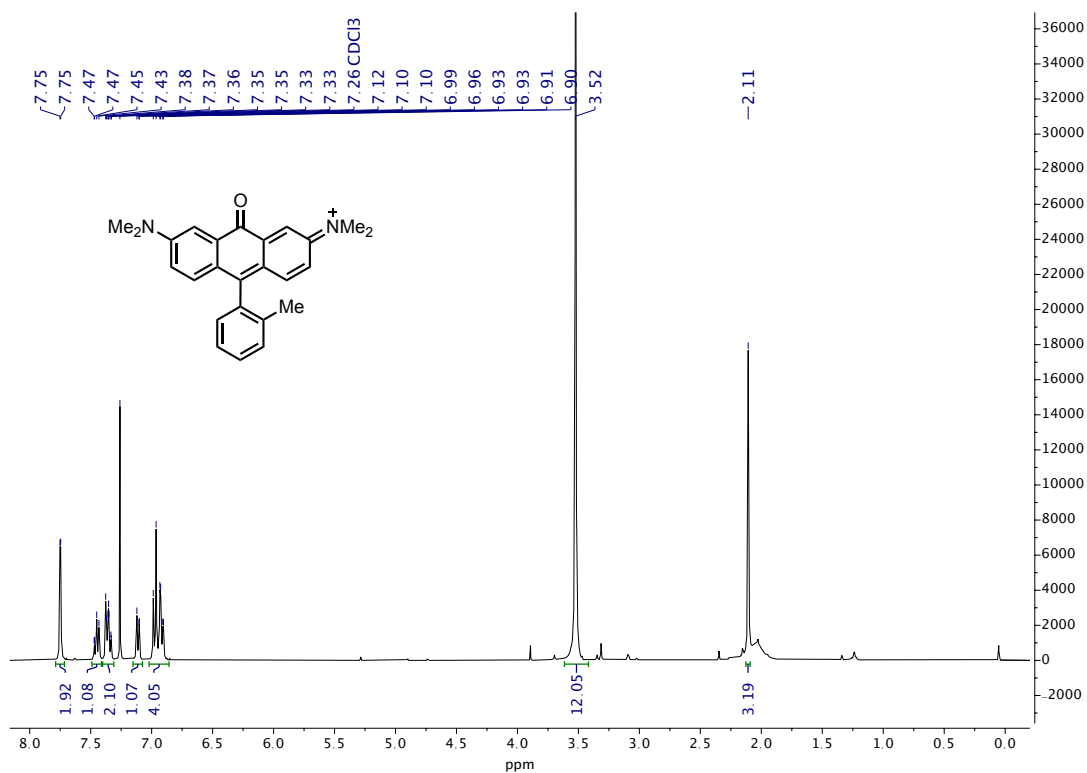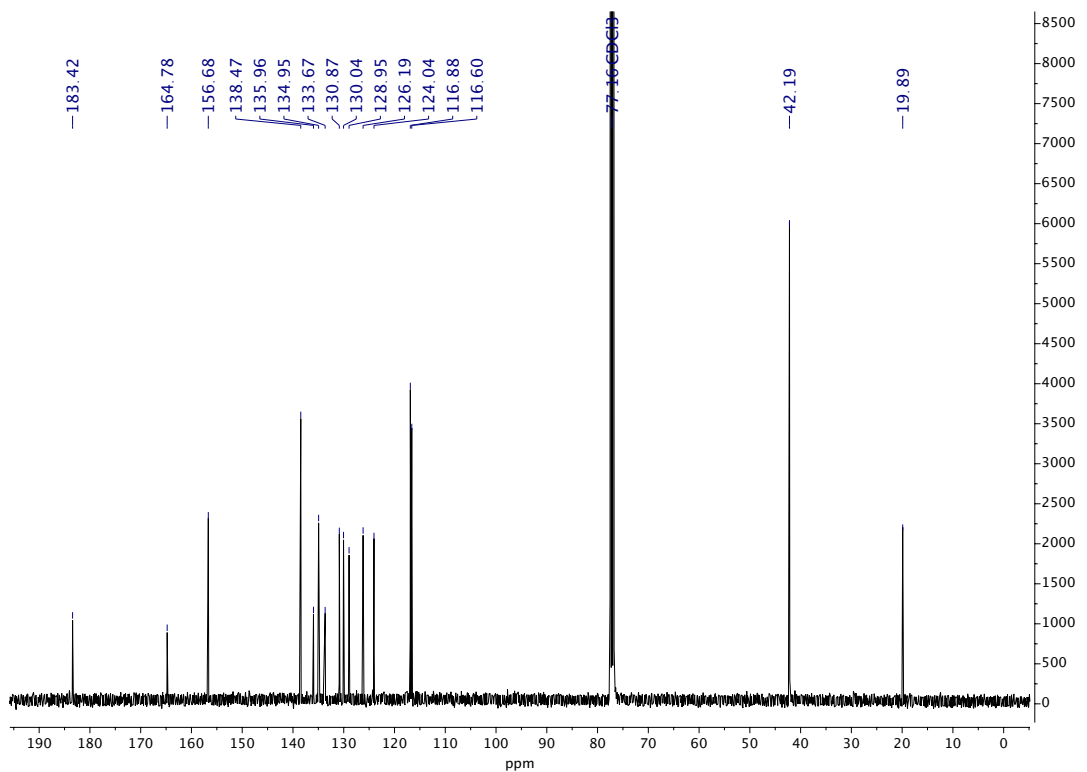

$^1\text{H}$  (400 MHz) and  $^{13}\text{C}$  (100 MHz) NMR spectra of **2-(3,6-bis(dimethylamino)-10-(methoxymethoxy)anthracen-9-yl)benzoic acid (4)**

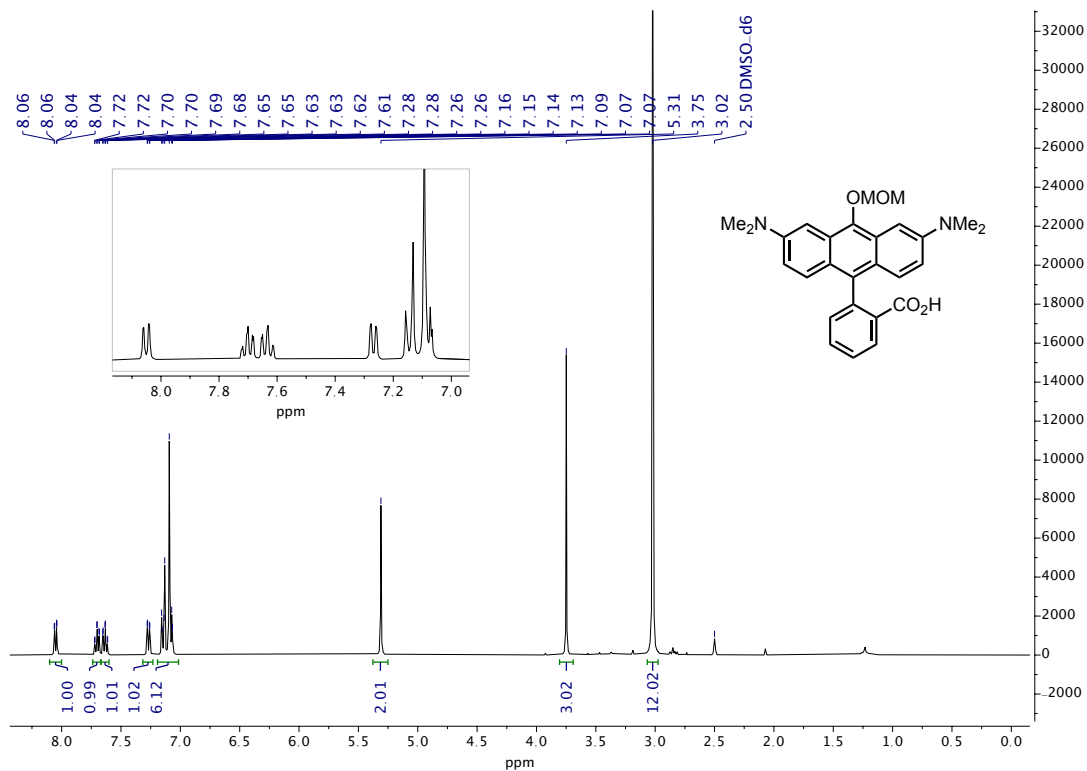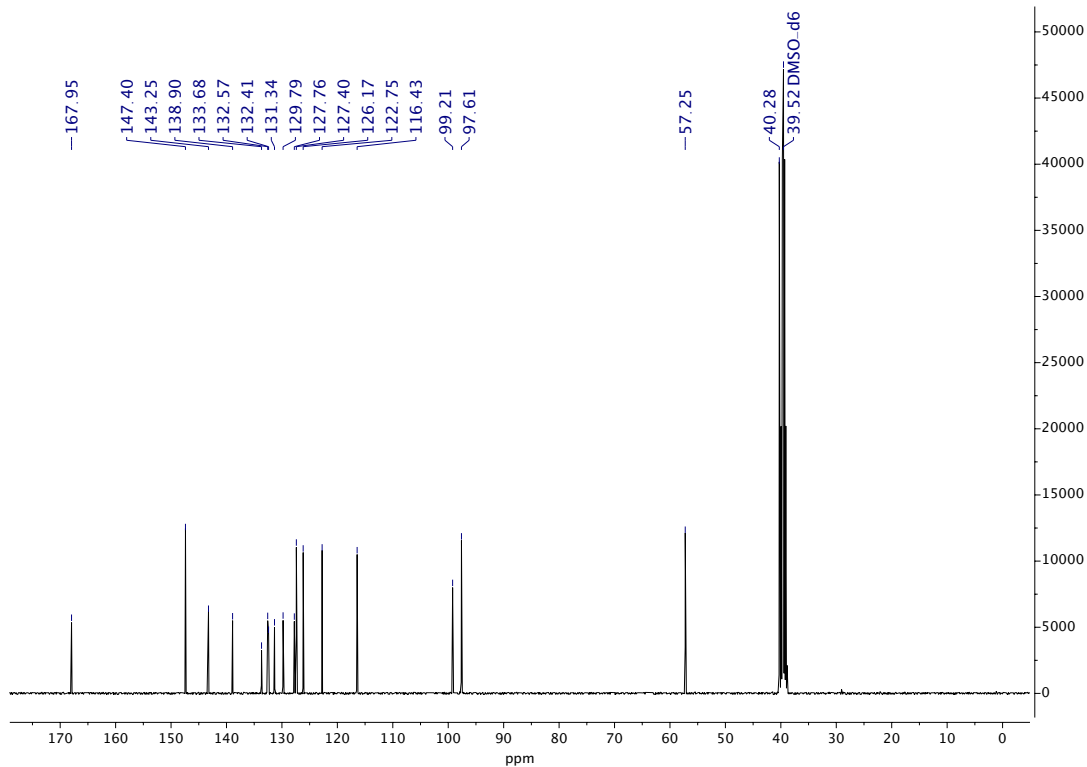



<sup>1</sup>H (500 MHz) and <sup>13</sup>C (125 MHz) NMR spectra of **3,6-bis(dimethylamino)-3',10H-spiro[anthracene-9,1'-isobenzofuran]-3',10-dione (KR-2)**

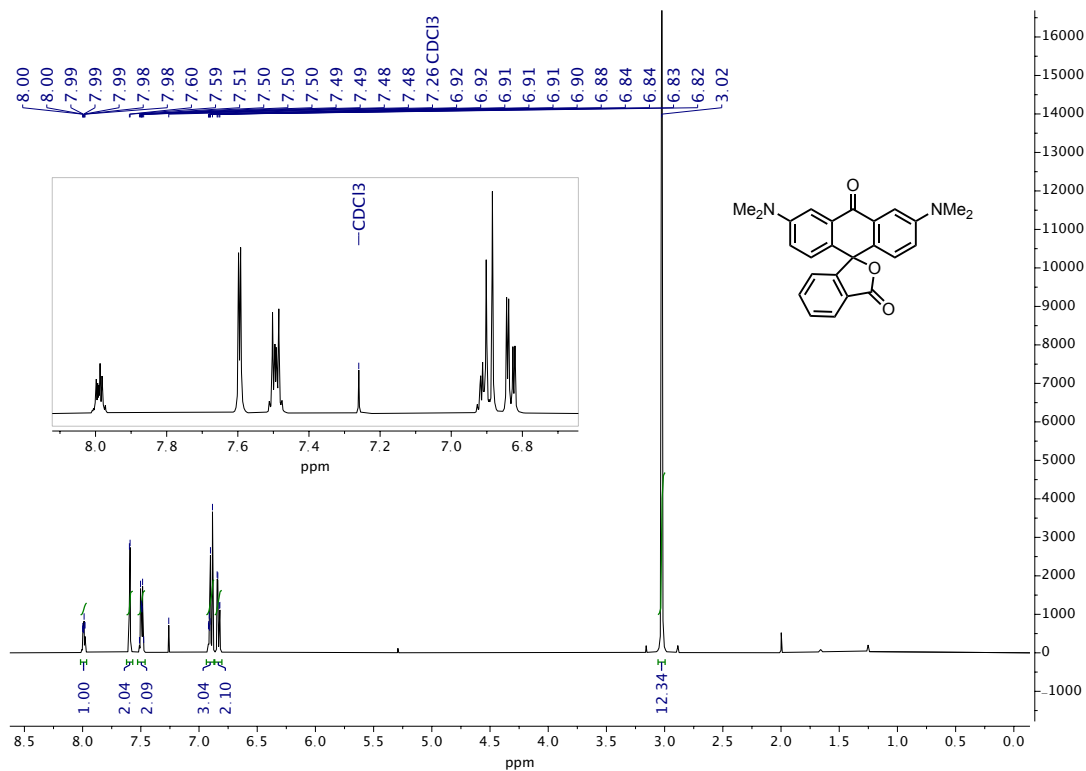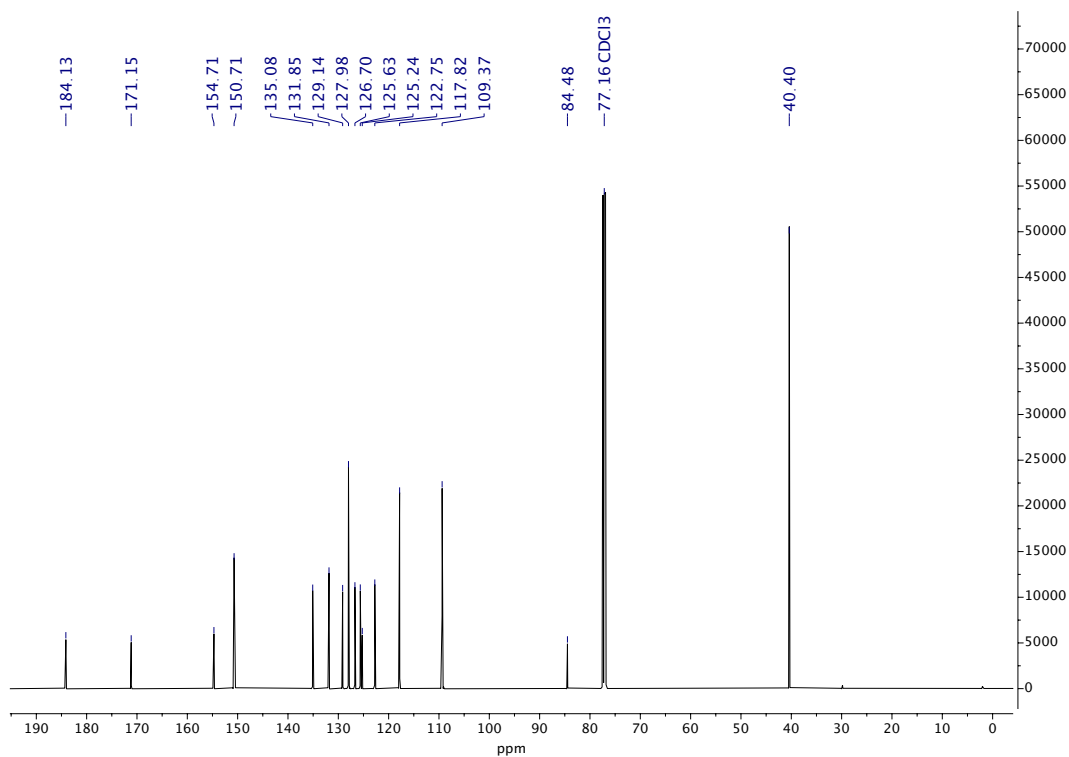

$^1\text{H}$  (500 MHz) and  $^{13}\text{C}$  (125 MHz) NMR spectra of **3-(2-(3,6-bis(dimethylamino)-10-(methoxymethoxy)anthracen-9-yl)-N-(3-(*tert*-butoxy)-3-oxopropyl)benzamido)propane-1-sulfonate (9)**

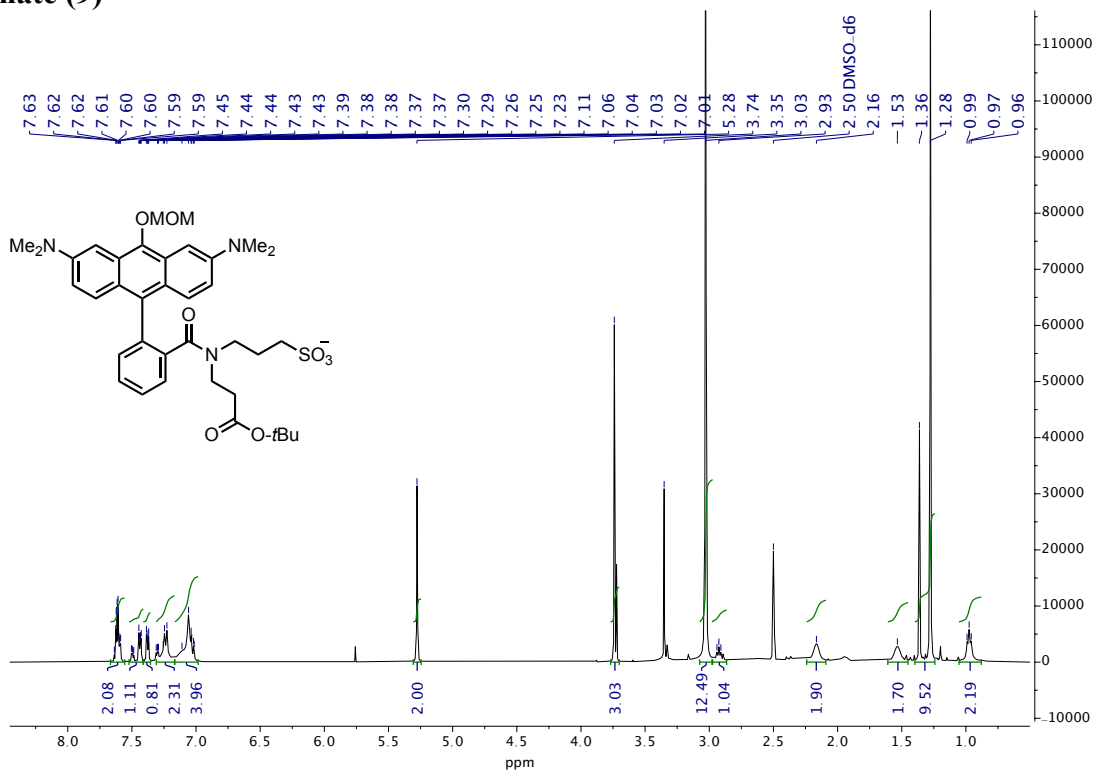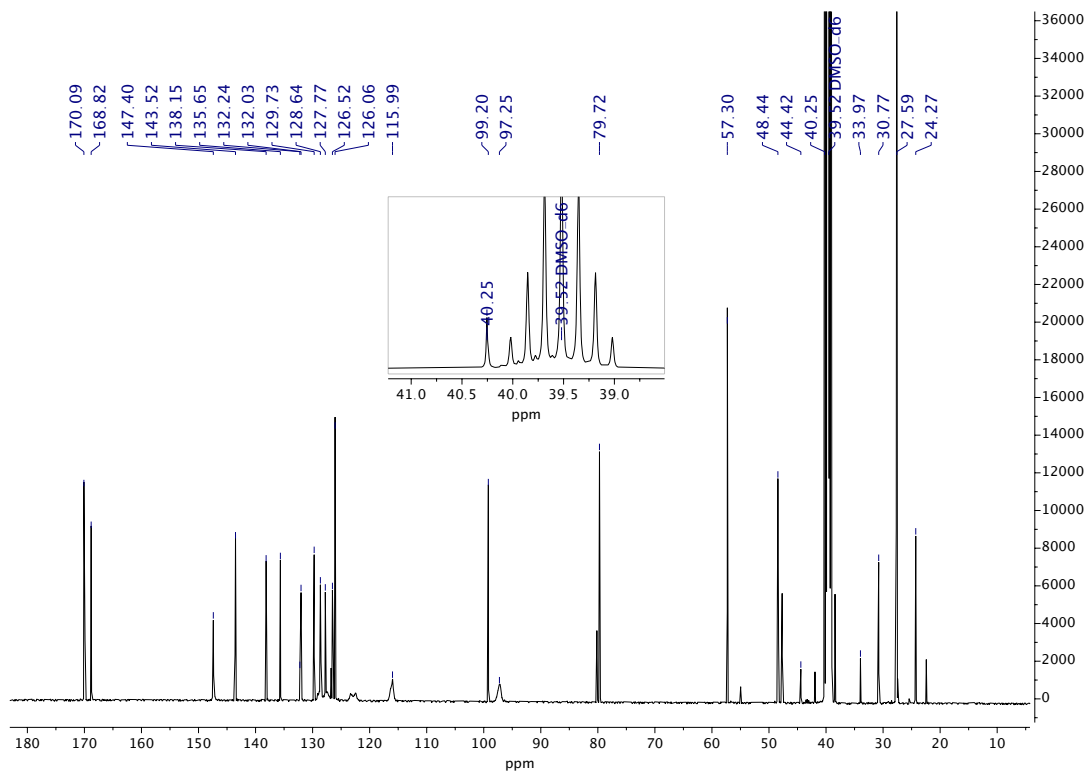

$^1\text{H}$  (400 MHz) and  $^{13}\text{C}$  (100 MHz) NMR spectra of **3-(*N*-(2-carboxyethyl)-2-(6-(dimethylamino)-3-(dimethyliminio)-10-oxo-3,10-dihydroanthracen-9-yl)benzamido)propane-1-sulfonate (KR-3)**

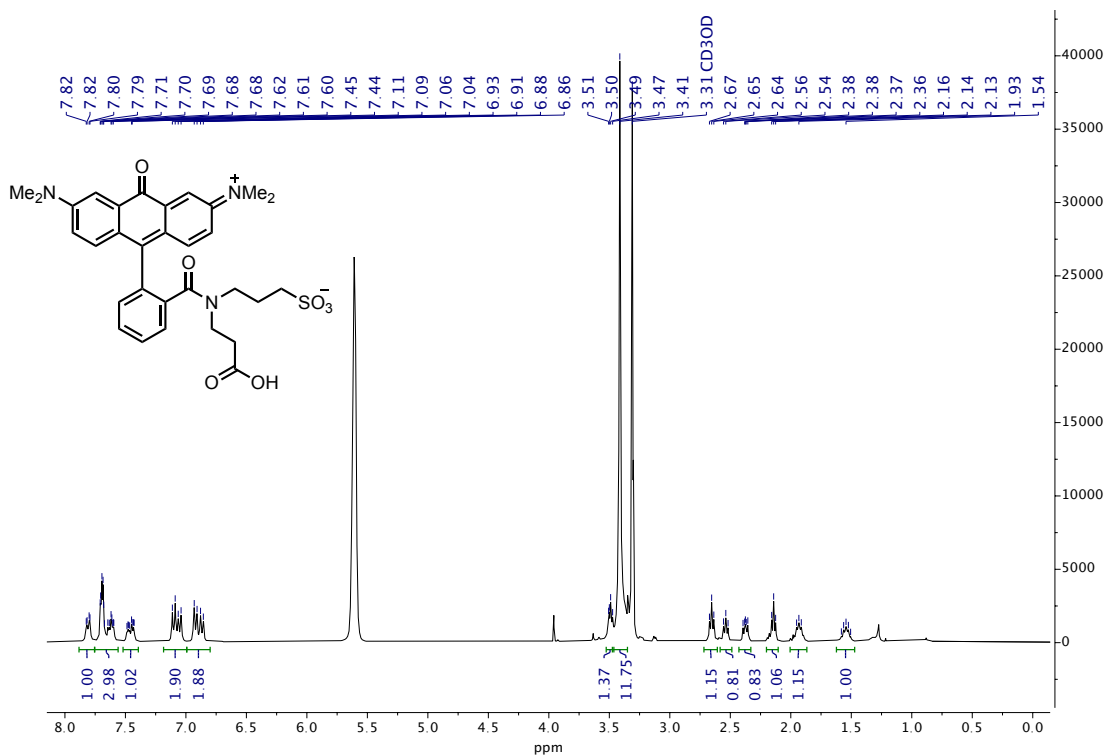

$^1\text{H}$  (400 MHz) and  $^{13}\text{C}$  (100 MHz) NMR spectra of methyl 2-(10-((*tert*-butyldimethylsilyloxy)-3,6-bis(dimethylamino)anthracen-9-yl)acetate (10)

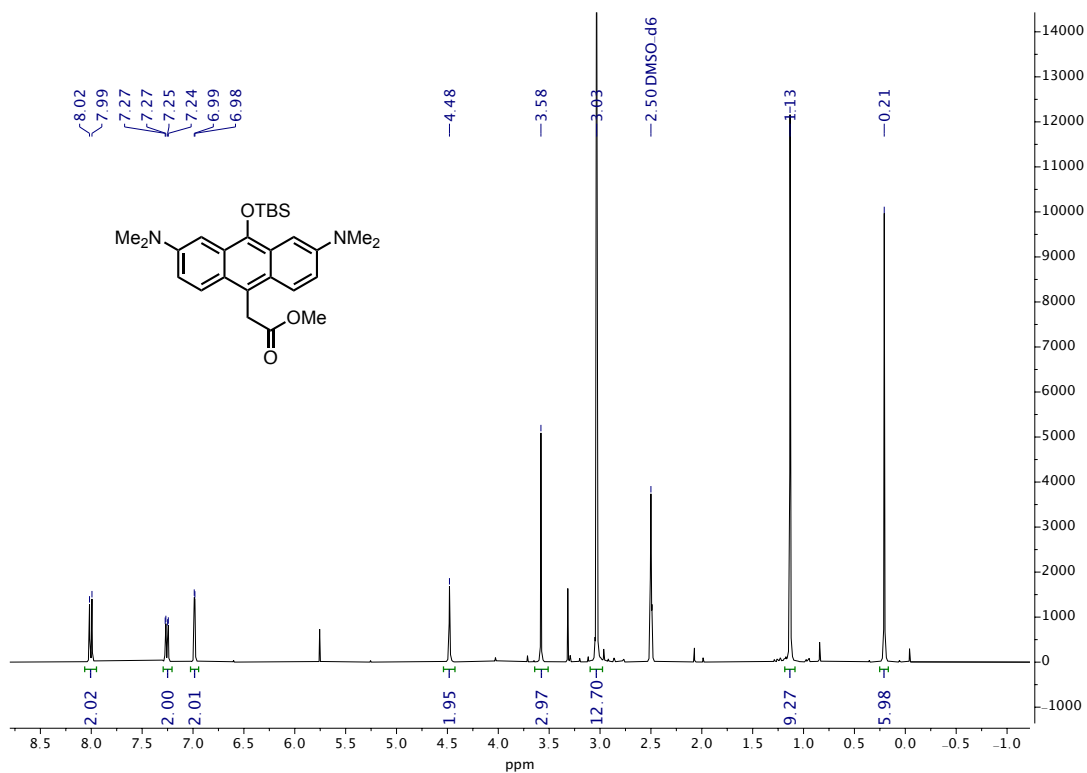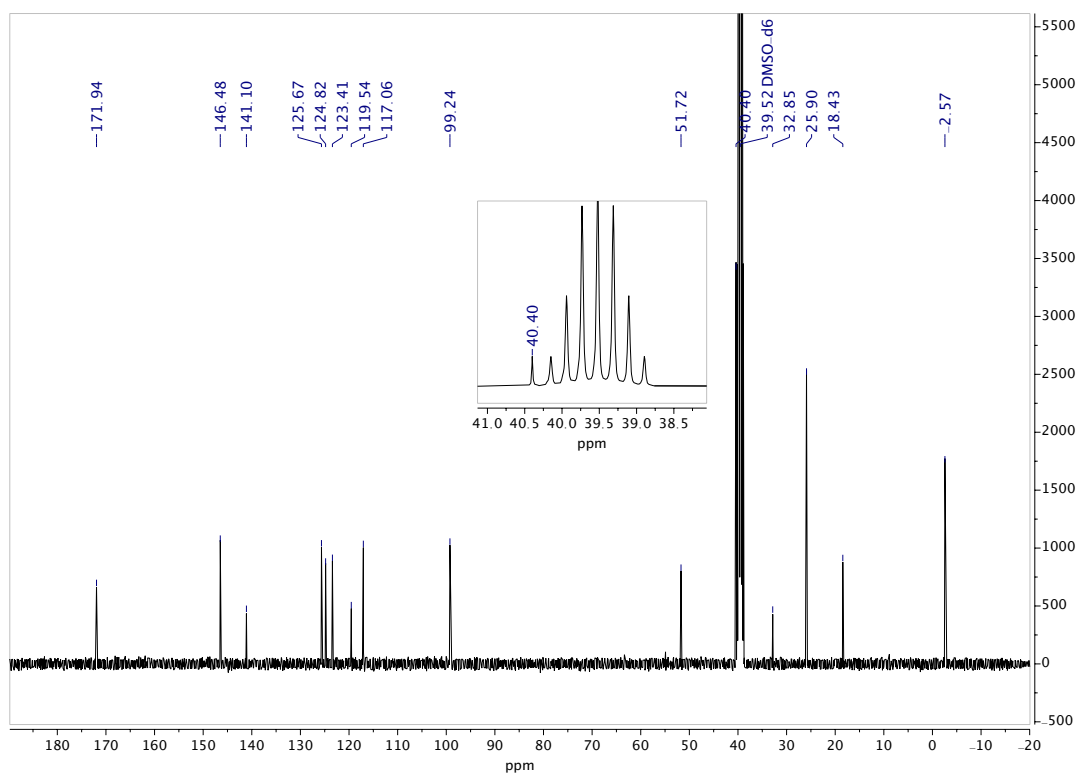

$^1\text{H}$  (400 MHz) and  $^{13}\text{C}$  (100 MHz) NMR spectra of methyl 2-(3,6-bis(dimethylamino)-10-oxoanthracen-9(10H)-ylidene)acetate (11)

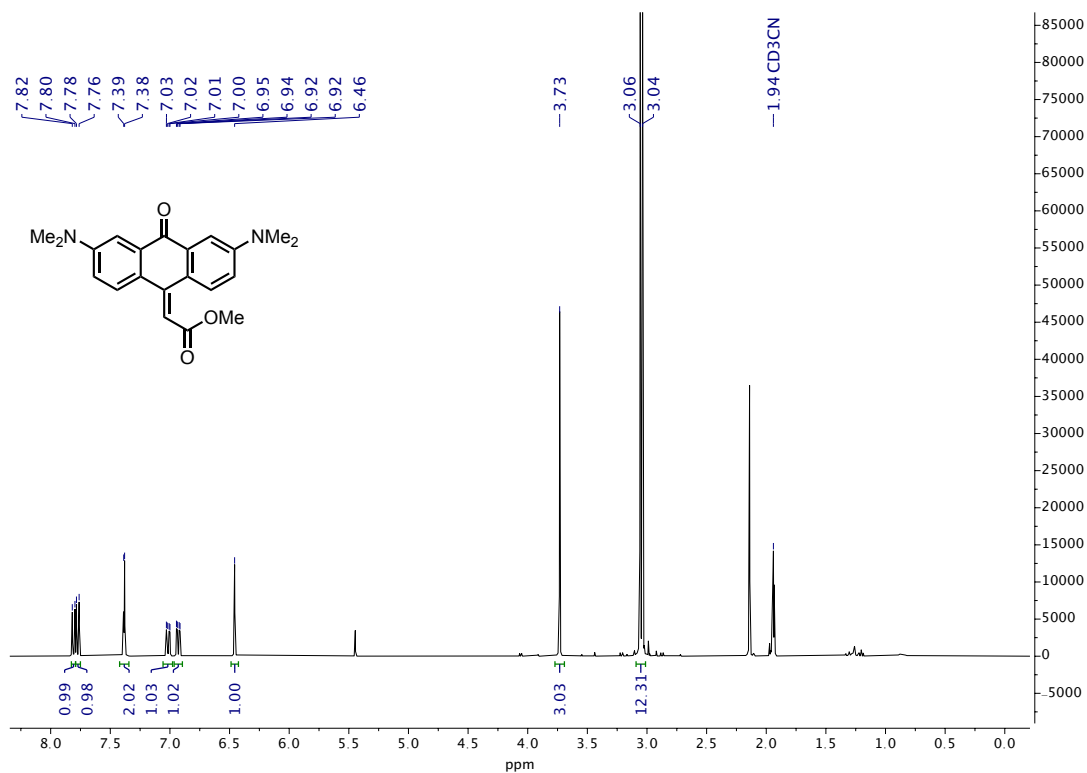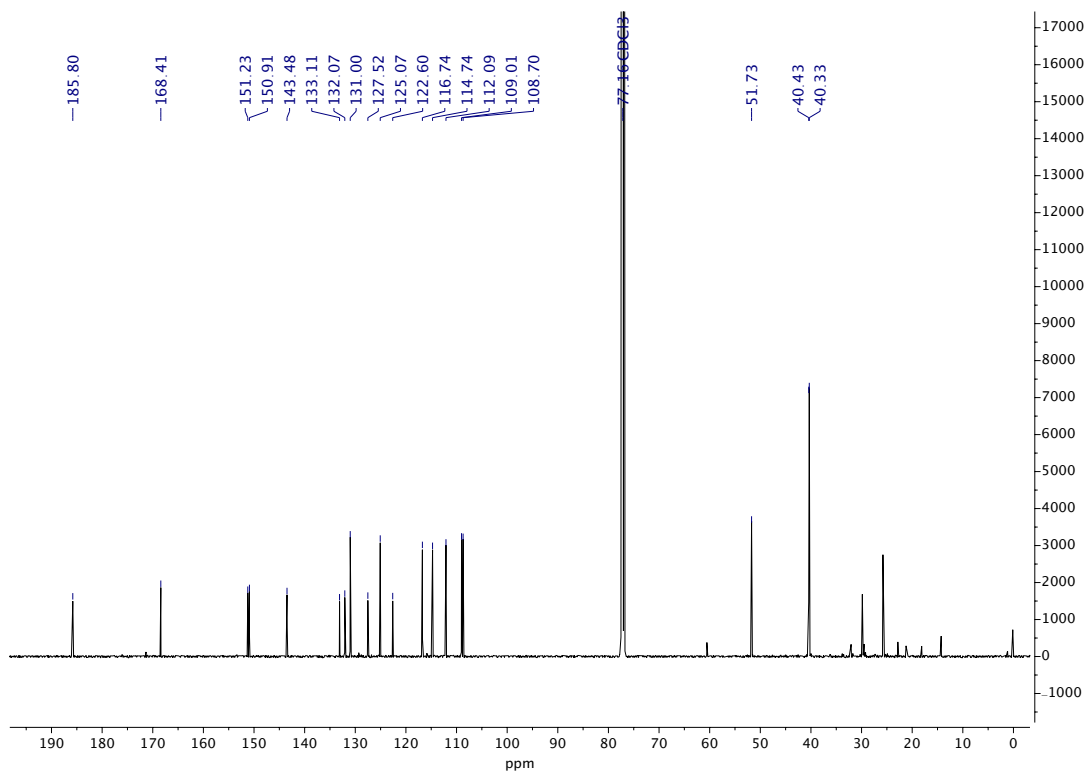

$^1\text{H}$  (500 MHz) and  $^{13}\text{C}$  (125 MHz) NMR spectra of *tert*-butyl 2-(10-((*tert*-butyldimethylsilyl)oxy)-3,6-bis(dimethylamino)anthracen-9-yl)acetate (**5**)

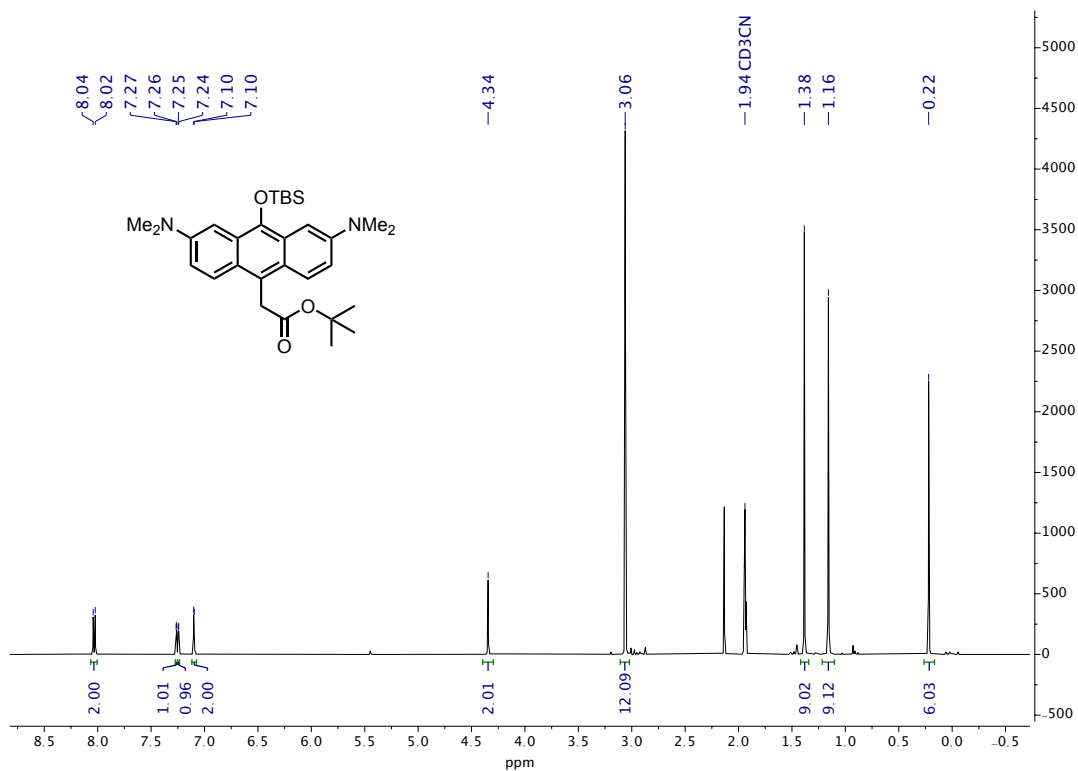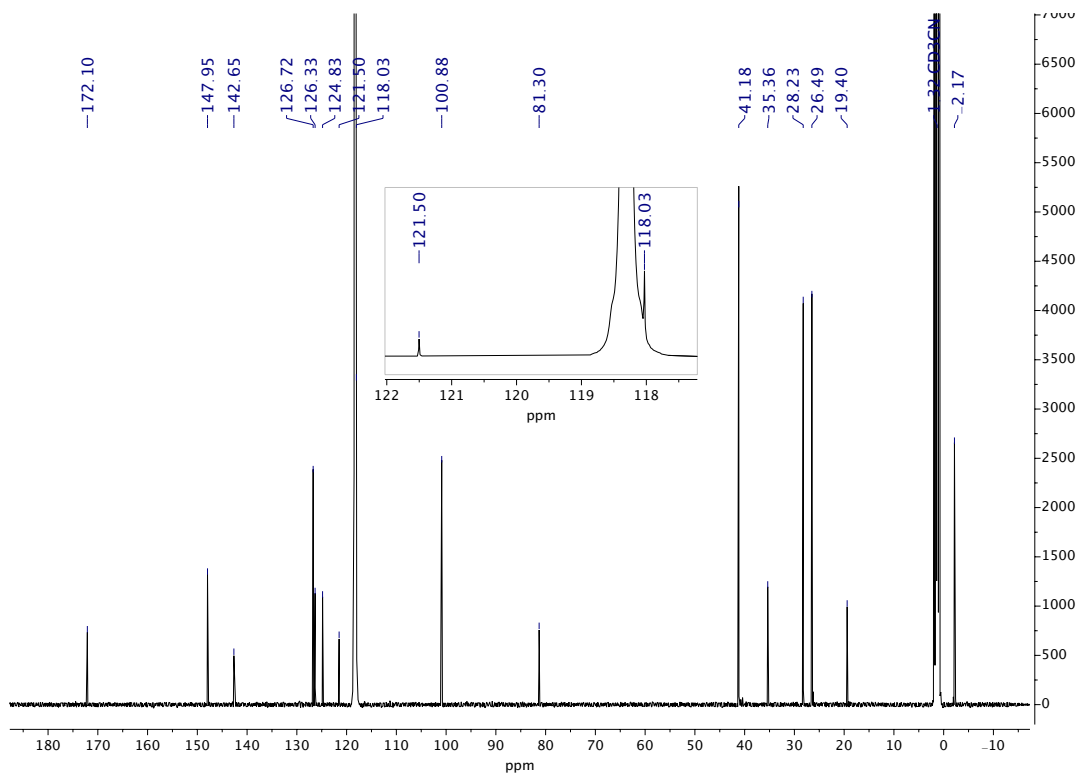

$^1\text{H}$  (400 MHz) and  $^{13}\text{C}$  (100 MHz) spectra of 1-(3,6-bis(dimethylamino)-10-oxoanthracen-9(10H)-ylidene)-2-oxo-6,9,12,15,18-pentaoxa-3-azaicosan-20-oic acid (KR-4)

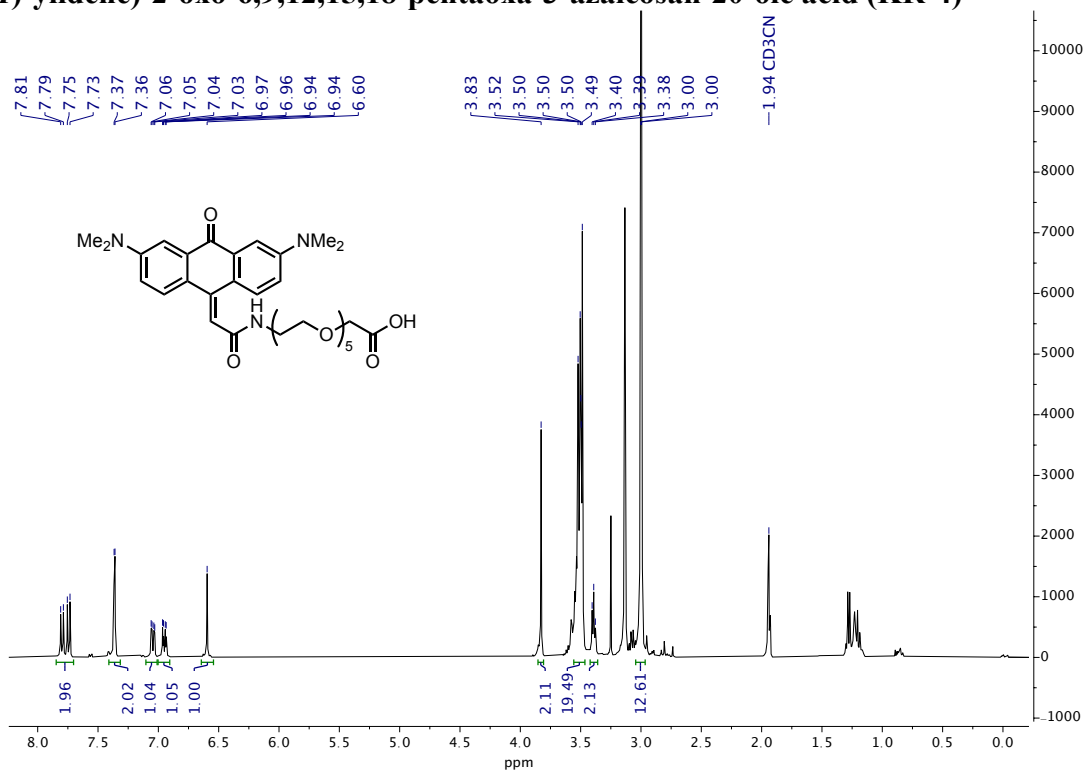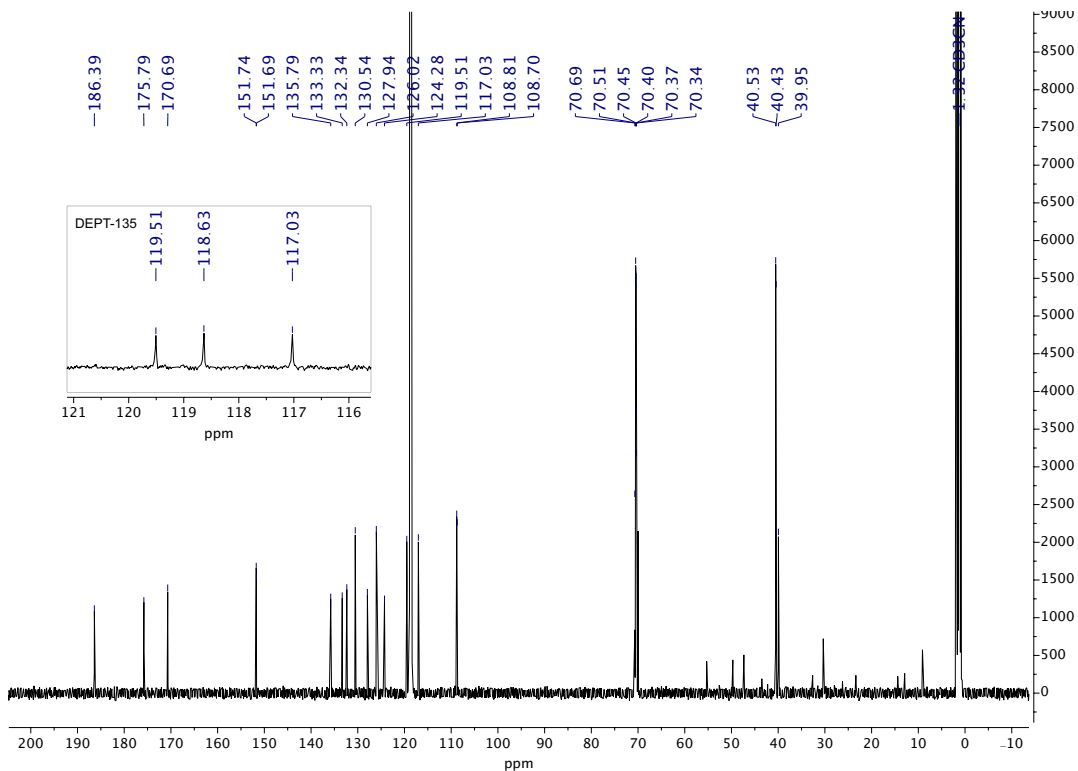

HSQC spectra of 1-(3,6-bis(dimethylamino)-10-oxoanthracen-9(10*H*)-ylidene)-2-oxo-6,9,12,15,18-pentaoxa-3-azaicosan-20-oic acid (KR-4)

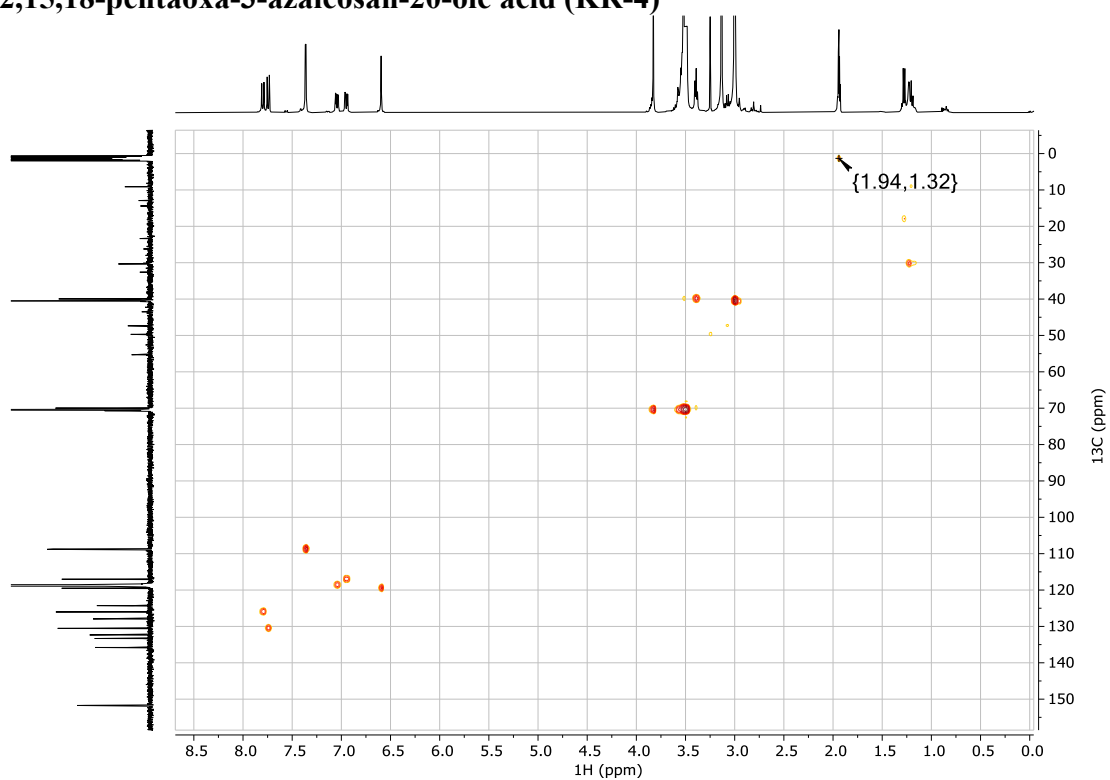

HSQC - Zoomed area of interest for KR-4

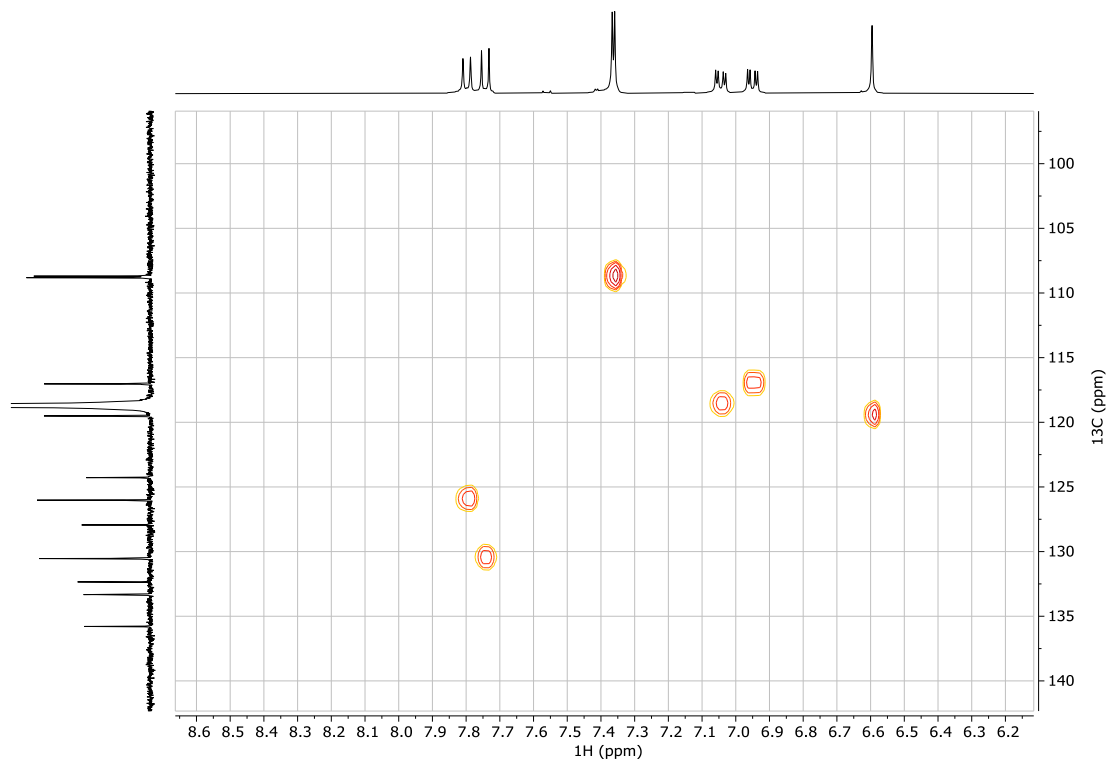



$^1\text{H}$  (400 MHz) NMR spectra of 3,3'-(((*tert*-butyldimethylsilyl)oxy)methylene)bis(4-bromo-*N,N*-dimethylaniline) (**2c**)

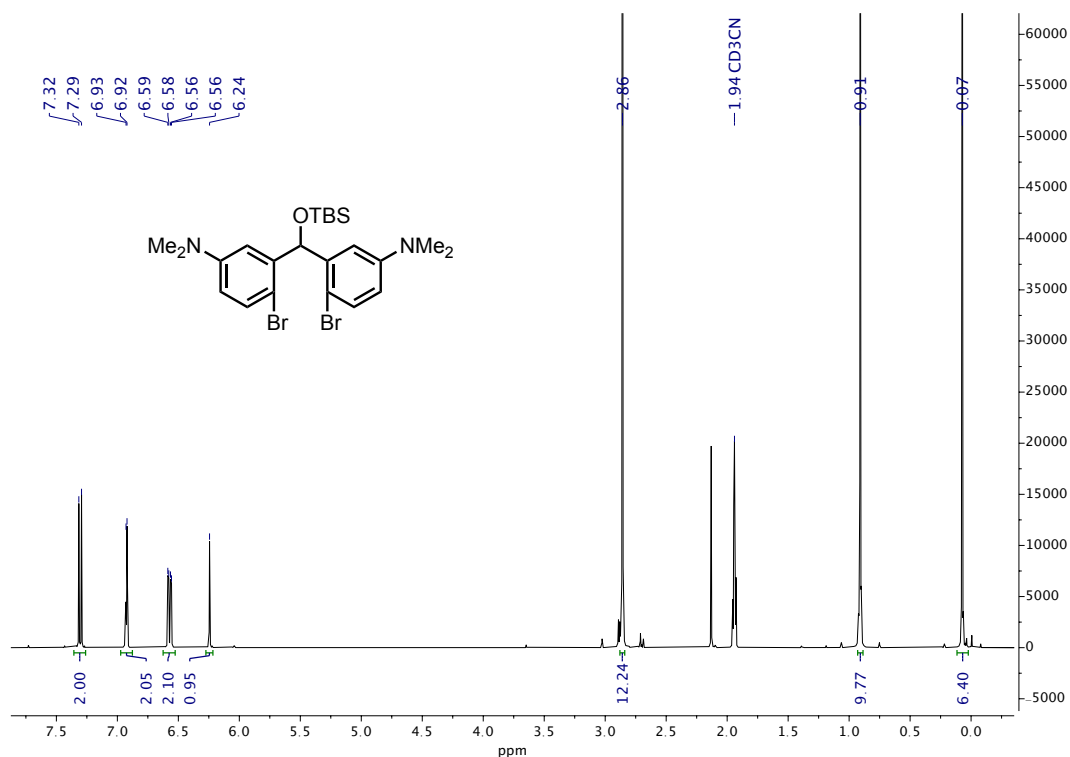

$^1\text{H}$  (400 MHz) NMR spectra of (2-(*tert*-butyldimethylsilyl)-5-(dimethylamino)phenyl)(3-(dimethylamino)phenyl-6-*H*)methanol (**2c-1**)

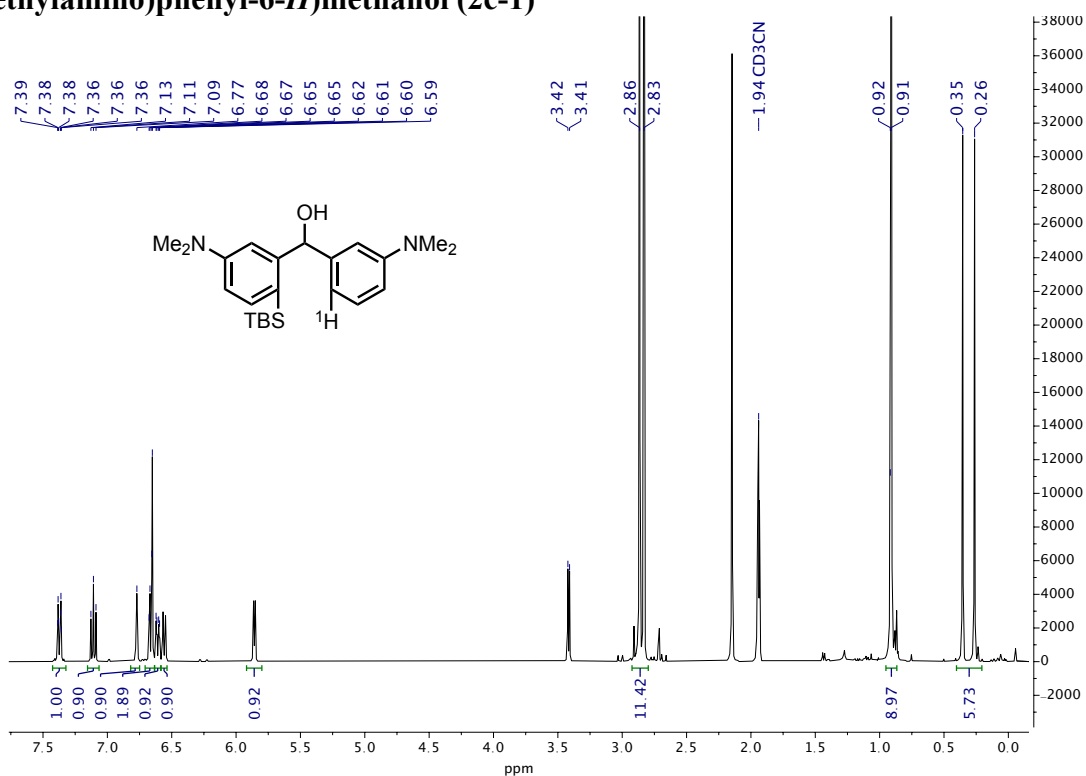

$^1\text{H}$  (400 MHz) NMR spectra of (2-(*tert*-butyldimethylsilyl)-5-(dimethylamino)phenyl)(3-(dimethylamino)phenyl-6-*d*)methanol (2c-2)

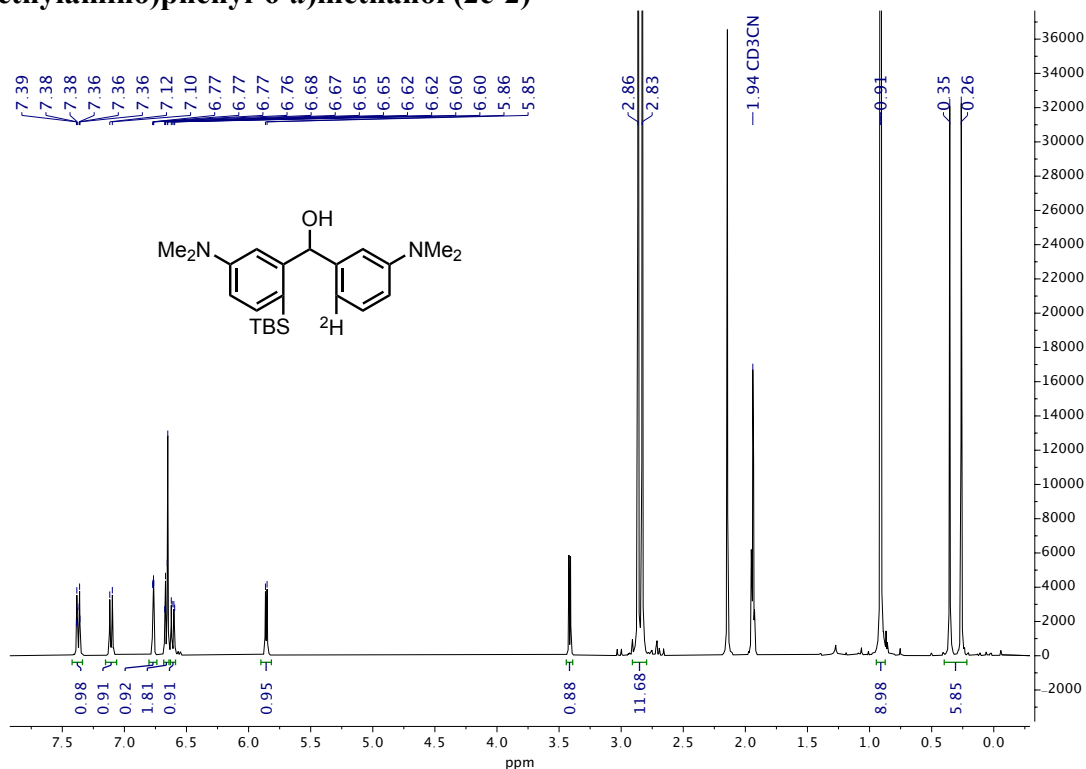

$^1\text{H}$  (400 MHz) NMR spectra of (2-(*tert*-butyldimethylsilyl)-5-(dimethylamino)phenyl)(3-(dimethylamino)phenyl-6-*H*)methanol-*d* (2c-3)

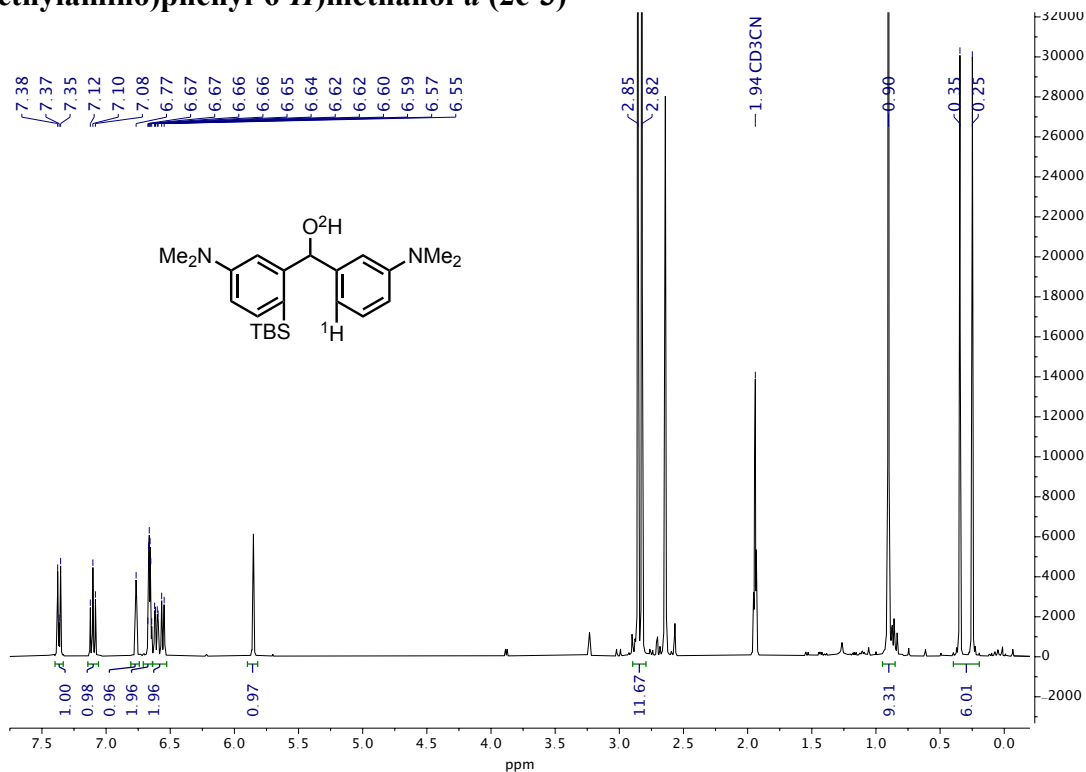

## Section S7: Computational Chemistry

Quantum chemistry calculations were performed using a local version of the GAMESS package(7, 8) where cc-pVTZ basis sets (spherical harmonics) were used throughout(9, 10). Molecular orbitals were illustrated with MacMolPlt(11).

Density functional theory (DFT)(12) utilizing the B3LYP functional(13-15) was used to optimize ground state (S0) geometries. The time-dependent density functional theory (TDDFT) method(16-18) was used to compute vertical excitation, or absorbance, energies (S0  $\rightarrow$  S1\*) at ground state (S0) optimized geometries, as well as deexcitation, or emission, energies (S1  $\rightarrow$  S0\*) at singlet excited state optimized geometries (S1)(19) Ground state (S0) DFT and excited state (S1) TDDFT computations used the Euler-MacLaurin radial(20) and Lebedev angular(21) grids with respective dimensions (96, 302) and (48, 110).

The occupation restricted multiple active space (ORMAS)(22, 23) method with second-order perturbation theory correction (ORMAS-PT2)(24) was also used to compute vertical excitation (absorbance) energies and deexcitation (emission) energies. ORMAS-PT2 calculations were performed at B3LYP ground state (S0; vertical excitation energy) and TDDFT-B3LYP excited state (S1; deexcitation energy) optimized geometries. ORMAS active spaces consisted of all valence  $\pi$  electrons and orbitals partitioned into three groups as follows:

1. All valence  $\pi$  bonding/lone-pair orbitals not including HOMO-like orbital (numbering N) with allowed total minimum & maximum occupation of (2N-2) & 2N, i.e., single & double excitations are allowed from this first group of N orbitals.

2. HOMO-like orbital and LUMO-like orbital with total minimum & maximum occupation of 0 and 4, i.e., single & double electron excitations are allowed into and out of this second group of two orbitals.

3. All remaining valence  $\pi$  antibonding orbitals with total minimum & maximum occupation of 0 and 2, i.e., single & double electron excitations are allowed into this third group.

For example, for R = NH and O the \$DET/\$ORMAS GAMESS input specifications are:

```
$det ncore=62 nels=18 nact=16 nstate=3 wstate(1)=1,1 $end
$ormas nspace=3 mstart(1)=63,71,73 mine(1)=14,0,0 maxe(1)=16,4,2 $end
```

The numbers of orbitals in each group and associated occupancy minima/maxima are given in **Table S3** below:

| R-group                                                           | No. orbitals in group 1<br>(min/max $e^-$ ) | No. of orbitals in group 2<br>(min/max $e^-$ ) | No. orbitals in group 3<br>(min/max $e^-$ ) |
|-------------------------------------------------------------------|---------------------------------------------|------------------------------------------------|---------------------------------------------|
| NH,O                                                              | 8 (14/16)                                   | 2 (0/4)                                        | 6 (0/2)                                     |
| CMe <sub>2</sub> , SiMe <sub>2</sub> ,<br>SO <sub>2</sub> , POOEt | 7 (12/14)                                   | 2 (0/4)                                        | 6 (0/2)                                     |
| C=O                                                               | 8 (14/16)                                   | 2 (0/4)                                        | 7 (0/2)                                     |

The ORMAS ground state (S0) and singlet excited state (S1) wavefunctions were simultaneously optimized (for orbitals and configuration interaction coefficients) by minimizing the average of

the two energies. Final improved ORMAS-PT2 energies for each state (S0 and S1) were then computed by modeling all single and double valence electron excitations out of the individual S0 and S1 ORMAS wavefunctions using second-order perturbation theory (1s orbitals were kept core).

The polarizable continuum model (PCM)(25-27) approach was used to model water solvent effects for the DFT(28), TDDFT(29), ORMAS(26), and ORMAS-PT2 methods. All calculations used a high density of tesserae (NTSALL = 960 in \$TESCAV).

Mulliken electron population analysis(30) was used to analyze the B3LYP-PCM highest occupied molecular orbitals (HOMOs) and lowest unoccupied molecular orbitals (LUMOs). Specifically, for each orbital we determined 1) C-C<sub>10'</sub> bond orders (see Figure 1A and Table SZ), and 2) the total electron populations on the R-groups that were then multiplied by the sign of the C-C<sub>10'</sub> bond order, i.e., the R-group electron populations were penalized to be negative if they introduced a node between ring-bound R-group atom and neighboring carbon atoms.

**Table S4:** Computed absorbance and emission energies (in eV with oscillator strengths in parentheses) vs. experimentally measured. Calculations included water solvent effects via the Polarizable Continuum Model (PCM). Mean unsigned errors (MUEs) for each method shown at bottom. See Methods for full details.

| R-Group             | Computed absorbance |       | Experimental absorbance | Computed emission |       | Experimental emission |
|---------------------|---------------------|-------|-------------------------|-------------------|-------|-----------------------|
|                     | TDDFT-B3LYP         | ORPT2 |                         | TDDFT-B3LYP       | ORPT2 |                       |
| N(H)                | 2.791 (0.90)        | 2.588 | 2.515 <sup>x</sup>      | 2.517 (1.22)      | 2.465 | 2.348                 |
| O                   | 2.666 (1.06)        | 2.386 | 2.267 <sup>x</sup>      | 2.366 (1.32)      | 2.288 | 2.206                 |
| C(Me) <sub>2</sub>  | 2.498 (1.14)        | 2.060 | 2.050 <sup>x</sup>      | 2.204 (1.39)      | 1.996 | 1.978                 |
| Si(Me) <sub>2</sub> | 2.401 (1.14)        | 1.972 | 1.956 <sup>x</sup>      | 2.100 (1.39)      | 1.903 | 1.914                 |
| S(O) <sub>2</sub>   | 2.247 (0.95)        | 1.846 | 1.771 <sup>x</sup>      | 1.924 (1.14)      | 1.746 | 1.717                 |
| P(OOEt)             | 2.223 (0.92)        | 1.824 | 1.764 <sup>x</sup>      | 1.863 (1.03)      | 1.684 | 1.689                 |
| C(O)                | 1.727 (0.41)        | 1.547 | 1.450 <sup>a</sup>      | 1.405 (0.48)      | 1.373 | 1.361                 |
| MUE                 | 0.397               | 0.065 |                         | 0.167             | 0.039 |                       |

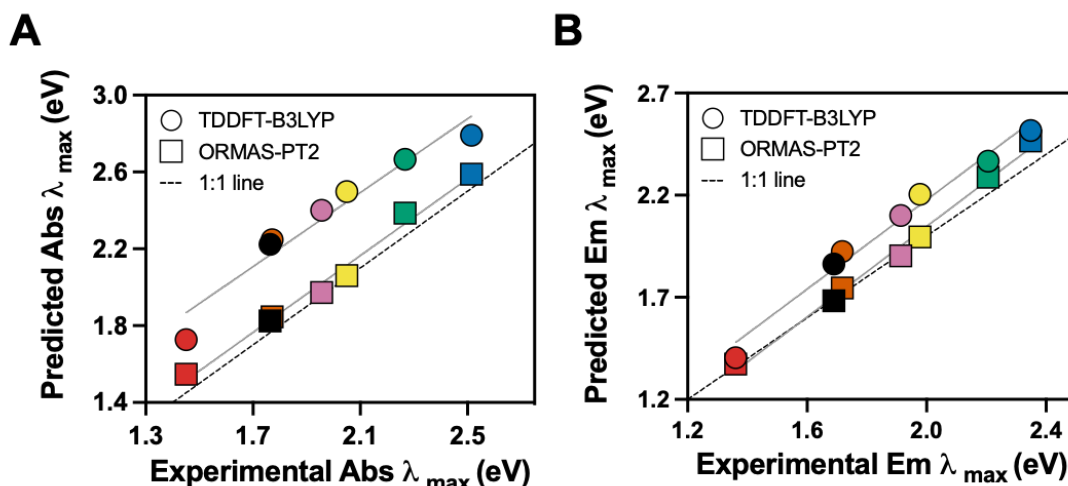

**Figure S4.** Experimental vs. predicted absorbance (A) and emission (B) energies (eV) using TDDFT-B3LYP-PCM(H<sub>2</sub>O) and ORMAS-PT2-PCM(H<sub>2</sub>O) methods. Mean unsigned errors (MUEs) in absorbance/emission predictions are 0.397/0.167 and 0.065/0.039 for TDDFT-B3LYP and ORMAS-PT2, respectively.

**Table S5:** Experimental and computed (TDDFT-B3LYP-PCM) absorbance energies (eV), C–C10' bond orders, and signed R-group electron populations in the LUMOs. Properties determined at ground state optimized geometries. Calculations included water solvent effects via the Polarizable Continuum Model (PCM). See Methods for full details. Correlation coefficients ( $R^2$ ) between experimental (left) and computed (right) absorbances vs. LUMO C–C10' bond orders and signed R-group electron populations are shown at bottom.

| R-group             | Experimental absorbance | Computed absorbance | LUMO C–C10' bond orders | LUMO R-group $e^-$ population |
|---------------------|-------------------------|---------------------|-------------------------|-------------------------------|
| N(H)                | 2.515                   | 2.791               | −0.049                  | −0.065 <sup>a</sup>           |
| O                   | 2.267                   | 2.666               | −0.039                  | −0.042 <sup>a</sup>           |
| C(Me) <sub>2</sub>  | 2.050                   | 2.498               | −0.001                  | −0.026 <sup>a</sup>           |
| Si(Me) <sub>2</sub> | 1.956                   | 2.401               | 0.002                   | 0.035                         |
| S(O) <sub>2</sub>   | 1.771                   | 2.247               | 0.024                   | 0.045                         |
| P(OOEt)             | 1.764                   | 2.223               | 0.021                   | 0.047                         |
| C(O)                | 1.450                   | 1.727               | 0.054                   | 0.181                         |
| $R^2$               |                         |                     | 0.94 / 0.87             | 0.88 / 0.97                   |

<sup>a</sup> These Mulliken populations are penalized to be negative since each R-group introduces a node to the LUMO that passes between the ring-bound R-group atom (not in parentheses) and neighboring carbon atoms, i.e., in these systems there is a negative C–C10' bond order in the LUMO. For the other molecules the C–C10' bond order is positive. See **Table S6** for further details.

**Table S6:** Examinations of HOMOs and LUMOs in the C10' substituted series via Mulliken electronic population analysis. For each orbital, the C–C10' bond order is provided along with the total electron population on the R group. Analyses were performed at ground state optimized geometries.

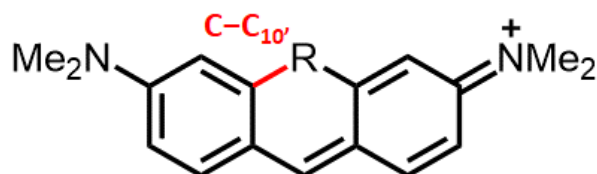

| R-group             | HOMO              |                    | LUMO              |                    |
|---------------------|-------------------|--------------------|-------------------|--------------------|
|                     | C–C10' bond order | R $e^-$ population | C–C10' bond order | R $e^-$ population |
| N(H)                | 0.000             | 0.000              | –0.049            | 0.065              |
| O                   | 0.000             | 0.000              | –0.039            | 0.042              |
| C(Me) <sub>2</sub>  | 0.000             | 0.001              | –0.001            | 0.026              |
| Si(Me) <sub>2</sub> | 0.000             | 0.001              | 0.022             | 0.035              |
| S(O) <sub>2</sub>   | 0.000             | 0.001              | 0.024             | 0.045              |
| P(OOEt)             | 0.000             | 0.000              | 0.021             | 0.047              |
| C(O)                | 0.000             | 0.000              | 0.054             | 0.181              |

## Section S8: Raw Computational Chemistry Data

I. Energies ( $S_0$  &  $S_1^*$  in hartree), oscillator strengths ( $S_0 \rightarrow S_1^*$ ), HOMO and LUMO energies (hartree), excitation/de-excitation amplitudes, and  $S_0$  optimized structures (Å)

### a. R1 (NH)

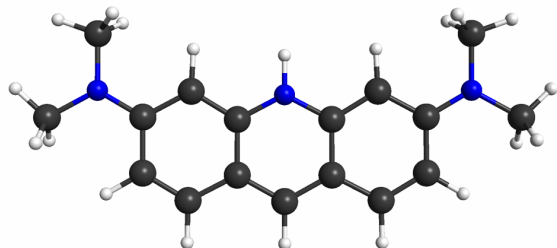

*TDDFT-B3LYP-PCM(H<sub>2</sub>O)*

$E(S_0) = -823.753609$

$E(S_1^*) = -823.651047$

Oscillator strength = 0.8956

$E(\text{HOMO}) = -0.2084$ ;  $E(\text{LUMO}) = -0.0954$

|     |     | EXCITATION | DE-EXCITATION |
|-----|-----|------------|---------------|
| OCC | VIR | AMPLITUDE  | AMPLITUDE     |
| I   | A   | X(I->A)    | Y(A->I)       |
| --- | --- | -----      | -----         |
| 68  | 72  | -0.042187  | -0.006089     |
| 71  | 72  | -0.987340  | 0.086689      |
| 69  | 73  | 0.058654   | 0.025205      |
| 70  | 73  | -0.149761  | -0.038580     |
| 69  | 74  | -0.043578  | -0.007822     |

| ATOM | CHARGE | X             | Y             | Z             |
|------|--------|---------------|---------------|---------------|
| C    | 6.0    | -1.2226311806 | 0.6677218834  | -0.0449552379 |
| C    | 6.0    | -2.2602567210 | -0.3138660898 | -0.0065562156 |
| C    | 6.0    | -1.9160583604 | -1.6623065593 | -0.0310673043 |
| C    | 6.0    | -0.5895440976 | -2.0777994523 | -0.0884399778 |
| C    | 6.0    | 0.4451749848  | -1.0932229219 | -0.1241529030 |
| N    | 7.0    | 0.0708497181  | 0.2236533337  | -0.1041878502 |
| C    | 6.0    | -2.8431158499 | 2.4716235052  | 0.0534042466  |
| C    | 6.0    | -3.8879748719 | 1.4842292919  | 0.0885132213  |
| C    | 6.0    | -3.5984866918 | 0.1557159806  | 0.0588000280  |
| C    | 6.0    | -1.5108919399 | 2.0262393918  | -0.0196271326 |
| H    | 1.0    | -4.9183632801 | 1.7962451348  | 0.1372421984  |
| H    | 1.0    | -4.3991506569 | -0.5717731078 | 0.0852000967  |
| H    | 1.0    | -0.6939709348 | 2.7299110812  | -0.0487530416 |
| N    | 7.0    | -3.1461413002 | 3.7896397426  | 0.0907972073  |
| C    | 6.0    | -2.0865431514 | 4.7892171070  | 0.0221113938  |

|   |     |               |               |               |
|---|-----|---------------|---------------|---------------|
| C | 6.0 | -4.5320767499 | 4.2425551450  | 0.1815757554  |
| H | 1.0 | -2.5302397588 | 5.7784039093  | 0.0572403549  |
| H | 1.0 | -1.5172808350 | 4.7010862109  | -0.9063260075 |
| H | 1.0 | -4.5411875231 | 5.3247165599  | 0.2568657121  |
| H | 1.0 | -5.1077180282 | 3.9572341900  | -0.7016281706 |
| H | 1.0 | -1.3944086994 | 4.6934882674  | 0.8621437480  |
| H | 1.0 | -5.0246961059 | 3.8372617767  | 1.0665588697  |
| H | 1.0 | -2.7011442403 | -2.4083928427 | -0.0025864590 |
| C | 6.0 | -0.1938077300 | -3.4413052146 | -0.1097146466 |
| C | 6.0 | 1.7849360127  | -1.4548510171 | -0.1774965618 |
| C | 6.0 | 1.1158649676  | -3.8025630614 | -0.1631911177 |
| C | 6.0 | 2.1568978413  | -2.8114980010 | -0.2017775402 |
| N | 7.0 | 3.4550608180  | -3.1876737532 | -0.2585483562 |
| C | 6.0 | 3.8320064862  | -4.5982206395 | -0.3147623786 |
| C | 6.0 | 4.5110148565  | -2.1821756937 | -0.2592907958 |
| H | 1.0 | 2.5310759978  | -0.6767154968 | -0.2038791914 |
| H | 1.0 | -0.9627426483 | -4.2020470302 | -0.0792650060 |
| H | 1.0 | 1.3718119483  | -4.8494197921 | -0.1722586369 |
| H | 1.0 | 4.9072856813  | -4.6651270539 | -0.4403333001 |
| H | 1.0 | 3.3604990868  | -5.1010197246 | -1.1602336895 |
| H | 1.0 | 5.4742746497  | -2.6804928738 | -0.2710962992 |
| H | 1.0 | 4.4608252562  | -1.5548855485 | 0.6336144981  |
| H | 1.0 | 4.4469772502  | -1.5368629744 | -1.1390060544 |
| H | 1.0 | 3.5612070847  | -5.1262034023 | 0.6023532392  |
| H | 1.0 | 0.8037349552  | 0.9194231997  | -0.1284159547 |

ORMAS-PT2-PCM(H<sub>2</sub>O) at B3LYP-PCM(H<sub>2</sub>O) optimized geometry

$E(S0) = -822.284283$  : ORMAS-PCM natural orbitals 71 / 72 occupations = 1.940 / 0.072

$E(S1^*) = -822.189168$  : ORMAS-PCM natural orbitals 71 / 72 occupations = 1.183 / 0.830

**b. R2 (O)**

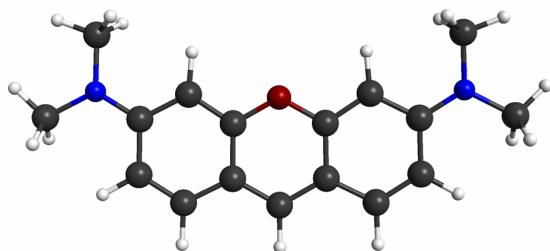

TDDFT-B3LYP-PCM(H<sub>2</sub>O)

$E(S0) = -843.601869$

$E(S1^*) = -843.503894$

Oscillator strength = 1.0637

$E(\text{HOMO}) = -0.2123$ ;  $E(\text{LUMO}) = -0.1072$



EXCITATION DE-EXCITATION  
 OCC VIR AMPLITUDE AMPLITUDE  
 I A X(I->A) Y(A->I)

| I  | A  | X(I->A)   | Y(A->I)   |
|----|----|-----------|-----------|
| 68 | 72 | 0.037796  | 0.004803  |
| 71 | 72 | 0.996944  | -0.111461 |
| 69 | 73 | 0.065997  | 0.028503  |
| 70 | 73 | -0.086145 | -0.029931 |
| 71 | 74 | -0.033024 | -0.004508 |
| 69 | 75 | -0.032036 | -0.005688 |

ATOM CHARGE X Y Z

| ATOM | CHARGE | X             | Y             | Z             |
|------|--------|---------------|---------------|---------------|
| C    | 6.0    | -1.2543120786 | 0.6019886662  | -0.0407150587 |
| C    | 6.0    | -2.2996166459 | -0.3604024924 | -0.0015587917 |
| C    | 6.0    | -1.9677077307 | -1.7111897978 | -0.0295958563 |
| C    | 6.0    | -0.6376981422 | -2.1138261050 | -0.0894503835 |
| C    | 6.0    | 0.3785562827  | -1.1207484173 | -0.1221968550 |
| O    | 8.0    | 0.0443767480  | 0.1986608014  | -0.1018446185 |
| C    | 6.0    | -2.8205310698 | 2.4350584267  | 0.0579192632  |
| C    | 6.0    | -3.8857721896 | 1.4735837228  | 0.0982021627  |
| C    | 6.0    | -3.6266960571 | 0.1375419941  | 0.0677812265  |
| C    | 6.0    | -1.4908650575 | 1.9547420499  | -0.0168869061 |
| H    | 1.0    | -4.9084645653 | 1.8088340750  | 0.1508437686  |
| H    | 1.0    | -4.4429735724 | -0.5720258797 | 0.0968743584  |
| H    | 1.0    | -0.6478566172 | 2.6251325968  | -0.0500200502 |
| N    | 7.0    | -3.0839076551 | 3.7560248397  | 0.0905678010  |
| C    | 6.0    | -1.9981005865 | 4.7295093908  | 0.0126120473  |
| C    | 6.0    | -4.4587586880 | 4.2475838233  | 0.1727649378  |
| H    | 1.0    | -2.4171677927 | 5.7288521952  | 0.0522197851  |
| H    | 1.0    | -1.4419808079 | 4.6256204490  | -0.9213360050 |
| H    | 1.0    | -4.4397453274 | 5.3302136449  | 0.2332311007  |
| H    | 1.0    | -5.0367431958 | 3.9632448922  | -0.7086717364 |
| H    | 1.0    | -1.3033764978 | 4.6147461893  | 0.8469909511  |
| H    | 1.0    | -4.9618072205 | 3.8652494350  | 1.0617491144  |
| H    | 1.0    | -2.7520870330 | -2.4575543639 | -0.0021650819 |
| C    | 6.0    | -0.2135802718 | -3.4676000873 | -0.1158475113 |
| C    | 6.0    | 1.7156490169  | -1.4309408313 | -0.1747839187 |
| C    | 6.0    | 1.1052402344  | -3.7996510618 | -0.1700243631 |
| C    | 6.0    | 2.1219061857  | -2.7866803957 | -0.2031614103 |
| N    | 7.0    | 3.4256526459  | -3.1229939878 | -0.2586497345 |
| C    | 6.0    | 3.8400555974  | -4.5241565133 | -0.3153094490 |
| C    | 6.0    | 4.4584007538  | -2.0904537320 | -0.2519936081 |
| H    | 1.0    | 2.4309264791  | -0.6255045667 | -0.1977520688 |
| H    | 1.0    | -0.9661360652 | -4.2444825592 | -0.0886430178 |
| H    | 1.0    | 1.3841599022  | -4.8403382007 | -0.1832668828 |

|   |     |              |               |               |
|---|-----|--------------|---------------|---------------|
| H | 1.0 | 4.9168761730 | -4.5639553655 | -0.4372824952 |
| H | 1.0 | 3.3819302371 | -5.0352507148 | -1.1625529342 |
| H | 1.0 | 5.4323897242 | -2.5669530111 | -0.2650807017 |
| H | 1.0 | 4.3909393489 | -1.4713409913 | 0.6446989716  |
| H | 1.0 | 4.3790110355 | -1.4441278809 | -1.1288107189 |
| H | 1.0 | 3.5778518533 | -5.0564326569 | 0.6012735192  |

ORMAS-PT2-PCM(H<sub>2</sub>O) at B3LYP-PCM(H<sub>2</sub>O) optimized geometry

$E(S0) = -842.115491$  : ORMAS-PCM natural orbitals 71 / 72 occupations = 1.945 / 0.068

$E(S1^*) = -842.027793$  : ORMAS-PCM natural orbitals 71 / 72 occupations = 1.023 / 0.988

### c. R3 (CMe<sub>2</sub>)

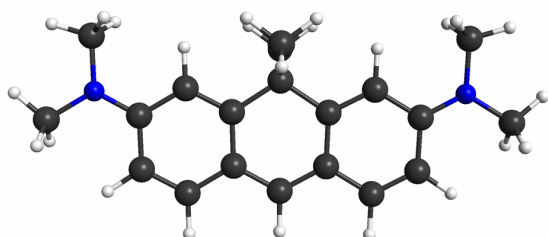

TDDFT-B3LYP-PCM(H<sub>2</sub>O)

$E(S0) = -886.268540$

$E(S1^*) = -886.176729$

Oscillator strength = 1.1385

$E(\text{HOMO}) = -0.2070$ ;  $E(\text{LUMO}) = -0.1104$

|     |     | EXCITATION | DE-EXCITATION |
|-----|-----|------------|---------------|
| OCC | VIR | AMPLITUDE  | AMPLITUDE     |
| I   | A   | X(I->A)    | Y(A->I)       |
| 79  | 80  | 1.002508   | -0.134081     |
| 76  | 81  | 0.035302   | 0.019047      |
| 79  | 81  | -0.055473  | -0.008565     |
| 77  | 82  | -0.049856  | -0.024708     |

| ATOM | CHARGE | X             | Y             | Z             |
|------|--------|---------------|---------------|---------------|
| C    | 6.0    | -1.1846279517 | 0.8008604074  | -0.1045345506 |
| C    | 6.0    | -2.1738499430 | -0.2142125284 | 0.0486986666  |
| C    | 6.0    | -1.8065520253 | -1.5592849299 | 0.0743685659  |
| C    | 6.0    | -0.4889366835 | -1.9986045685 | -0.0432123114 |
| C    | 6.0    | 0.5738408138  | -1.0611756156 | -0.1981089499 |
| C    | 6.0    | 0.2985324569  | 0.4456010379  | -0.2491399530 |
| C    | 6.0    | -2.9441095056 | 2.5048835651  | 0.0062272515  |
| C    | 6.0    | -3.9204822941 | 1.4750465993  | 0.1532425941  |

|   |     |               |               |               |
|---|-----|---------------|---------------|---------------|
| C | 6.0 | -3.5347478180 | 0.1677837592  | 0.1729581040  |
| C | 6.0 | -1.5809721817 | 2.1165183842  | -0.1240414266 |
| H | 1.0 | -4.9649639667 | 1.7232828512  | 0.2486453804  |
| H | 1.0 | -4.2806156373 | -0.6086378280 | 0.2858980411  |
| H | 1.0 | -0.8380708498 | 2.8879977900  | -0.2390160583 |
| N | 7.0 | -3.3012650497 | 3.8050474800  | -0.0066116748 |
| C | 6.0 | -2.2983755020 | 4.8572021671  | -0.1600998549 |
| C | 6.0 | -4.7003279119 | 4.1969727197  | 0.1552771003  |
| H | 1.0 | -2.7972501444 | 5.8199267933  | -0.1604053389 |
| H | 1.0 | -1.7563690540 | 4.7523338559  | -1.1014070042 |
| H | 1.0 | -4.7620424975 | 5.2795083674  | 0.1552957885  |
| H | 1.0 | -5.3166612772 | 3.8172193935  | -0.6617388975 |
| H | 1.0 | -1.5808611235 | 4.8419145920  | 0.6624911984  |
| H | 1.0 | -5.1045515368 | 3.8294280194  | 1.0997009607  |
| H | 1.0 | -2.5866248116 | -2.3030178772 | 0.1918493860  |
| C | 6.0 | -0.1822117957 | -3.3841679000 | -0.0107611515 |
| C | 6.0 | 1.8607417769  | -1.5299840908 | -0.3078132007 |
| C | 6.0 | 1.0962927656  | -3.8419627749 | -0.1243908035 |
| C | 6.0 | 2.1732108114  | -2.9190502726 | -0.2769205760 |
| N | 7.0 | 3.4458087578  | -3.3488793265 | -0.3888976909 |
| C | 6.0 | 3.7549995951  | -4.7779258412 | -0.3999163708 |
| C | 6.0 | 4.5511912325  | -2.4000774187 | -0.5028813856 |
| H | 1.0 | 2.6676679776  | -0.8264377074 | -0.4280826639 |
| H | 1.0 | -0.9944325796 | -4.0898847598 | 0.1091028065  |
| H | 1.0 | 1.2868284340  | -4.9023675181 | -0.0919474259 |
| H | 1.0 | 4.8188342306  | -4.9036872780 | -0.5676033325 |
| H | 1.0 | 3.2196878188  | -5.2897779924 | -1.2008902452 |
| H | 1.0 | 5.4858208656  | -2.9495706429 | -0.5142293983 |
| H | 1.0 | 4.5683669329  | -1.7142059267 | 0.3452118427  |
| H | 1.0 | 4.4834198147  | -1.8180352059 | -1.4243461836 |
| H | 1.0 | 3.4976074562  | -5.2496505498 | 0.5506803341  |
| C | 6.0 | 0.8005712542  | 0.9887804141  | -1.6140591336 |
| C | 6.0 | 1.0841368063  | 1.1280133926  | 0.9025574706  |
| H | 1.0 | 0.2655339819  | 0.5185862705  | -2.4393259322 |
| H | 1.0 | 0.6492439852  | 2.0649946936  | -1.6770730984 |
| H | 1.0 | 1.8637113378  | 0.7903199009  | -1.7379491462 |
| H | 1.0 | 2.1503943749  | 0.9295622702  | 0.8103852679  |
| H | 1.0 | 0.7491704223  | 0.7595668082  | 1.8722250189  |
| H | 1.0 | 0.9410384973  | 2.2069033606  | 0.8788168302  |

ORMAS-PT2-PCM(H<sub>2</sub>O) at B3LYP-PCM(H<sub>2</sub>O) optimized geometry

$E(S0) = -884.672184$  : ORMAS-PCM natural orbitals 79 / 80 occupations = 1.945 / 0.068

$E(S1^*) = -884.596467$  : ORMAS-PCM natural orbitals 79 / 80 occupations = 1.020 / 0.991

d. R4 (SiMe<sub>2</sub>)

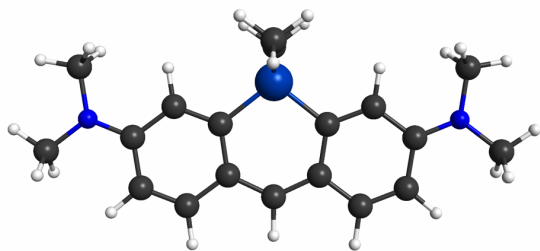

TDDFT-B3LYP-PCM(H<sub>2</sub>O)

$E(S0) = -1137.678861$

$E(S1^*) = -1137.590633$

Oscillator strength = 1.1388

$E(HOMO) = -0.2078$ ;  $E(LUMO) = -0.1151$

|     |     | EXCITATION | DE-EXCITATION |
|-----|-----|------------|---------------|
| OCC | VIR | AMPLITUDE  | AMPLITUDE     |
| I   | A   | X(I->A)    | Y(A->I)       |
| --- | --- | -----      | -----         |
| 80  | 84  | 0.044641   | 0.005492      |
| 83  | 84  | 1.001235   | -0.138984     |
| 80  | 85  | -0.048737  | -0.025170     |
| 83  | 85  | -0.065898  | -0.011229     |
| 81  | 86  | 0.039006   | 0.019489      |

| ATOM | CHARGE | X             | Y             | Z             |
|------|--------|---------------|---------------|---------------|
| C    | 6.0    | -1.2082030246 | 1.0527659644  | -0.0210967970 |
| C    | 6.0    | -2.0911782649 | -0.0747052931 | 0.0143045388  |
| C    | 6.0    | -1.6527920117 | -1.4082039944 | -0.0137065050 |
| C    | 6.0    | -0.3481095455 | -1.9234454159 | -0.0815575095 |
| C    | 6.0    | 0.8266262931  | -1.1057832558 | -0.1338037208 |
| SI   | 14.0   | 0.6609955540  | 0.7763323390  | -0.1042139194 |
| C    | 6.0    | -3.1454826175 | 2.5662371675  | 0.0753362072  |
| C    | 6.0    | -4.0082144181 | 1.4336418227  | 0.1115844827  |
| C    | 6.0    | -3.4892053961 | 0.1709954872  | 0.0812847196  |
| C    | 6.0    | -1.7378715518 | 2.3198347786  | 0.0099458316  |
| H    | 1.0    | -5.0769061918 | 1.5642935958  | 0.1644139350  |
| H    | 1.0    | -4.1637580664 | -0.6757631339 | 0.1099575203  |
| H    | 1.0    | -1.0742276996 | 3.1713484042  | -0.0179997515 |
| N    | 7.0    | -3.6353604214 | 3.8197096016  | 0.1017703524  |
| C    | 6.0    | -2.7439677435 | 4.9784192066  | 0.0802869147  |
| C    | 6.0    | -5.0778081849 | 4.0523730688  | 0.1614121241  |
| H    | 1.0    | -3.3417252657 | 5.8815858925  | 0.1314359157  |
| H    | 1.0    | -2.1546574495 | 5.0063934062  | -0.8378024100 |

|   |     |               |               |               |
|---|-----|---------------|---------------|---------------|
| H | 1.0 | -5.2651221277 | 5.1203263198  | 0.1429754081  |
| H | 1.0 | -5.5834290936 | 3.5995590162  | -0.6927785740 |
| H | 1.0 | -2.0642693744 | 4.9680103262  | 0.9337641304  |
| H | 1.0 | -5.5048687480 | 3.6420391755  | 1.0783294160  |
| H | 1.0 | -2.4416374169 | -2.1527847009 | 0.0204980554  |
| C | 6.0 | -0.1828785154 | -3.3343037813 | -0.1023522498 |
| C | 6.0 | 2.0597809297  | -1.7068108866 | -0.2049023466 |
| C | 6.0 | 1.0471334936  | -3.9243850373 | -0.1712409909 |
| C | 6.0 | 2.2255957076  | -3.1261996430 | -0.2268619379 |
| N | 7.0 | 3.4481487259  | -3.6859201445 | -0.2967405603 |
| C | 6.0 | 3.6024435267  | -5.1395997951 | -0.2887739128 |
| C | 6.0 | 4.6523498047  | -2.8597270685 | -0.3728449103 |
| H | 1.0 | 2.9443433705  | -1.0887474378 | -0.2419259284 |
| H | 1.0 | -1.0656310960 | -3.9603928435 | -0.0635583856 |
| H | 1.0 | 1.1163831417  | -5.0000407192 | -0.1866928931 |
| H | 1.0 | 4.6596150674  | -5.3800138423 | -0.3052732169 |
| H | 1.0 | 3.1311486935  | -5.5918226312 | -1.1634552845 |
| H | 1.0 | 5.5150213070  | -3.5075479785 | -0.4821322330 |
| H | 1.0 | 4.7819018380  | -2.2623885673 | 0.5318212420  |
| H | 1.0 | 4.6161321668  | -2.1903676480 | -1.2333443046 |
| H | 1.0 | 3.1641764903  | -5.5757401757 | 0.6101183130  |
| C | 6.0 | 1.3638600178  | 1.5209718678  | -1.6778276615 |
| C | 6.0 | 1.4928244901  | 1.4865273858  | 1.4217405085  |
| H | 1.0 | 1.1999814780  | 2.6001735404  | -1.7027622833 |
| H | 1.0 | 2.4393652285  | 1.3451003253  | -1.7445491854 |
| H | 1.0 | 2.5659530666  | 1.2862969546  | 1.4071556782  |
| H | 1.0 | 1.3556748605  | 2.5689695092  | 1.4666654492  |
| H | 1.0 | 1.0768842211  | 1.0531229216  | 2.3322862694  |
| H | 1.0 | 0.8923819315  | 1.0851867863  | -2.5597952704 |

ORMAS-PT2-PCM(H<sub>2</sub>O) at B3LYP-PCM(H<sub>2</sub>O) optimized geometry

$E(S0) = -1135.721772$  : ORMAS-PCM natural orbitals 83 / 84 occupations = 1.945 / 0.072

$E(S1^*) = -1135.649301$  : ORMAS-PCM natural orbitals 83 / 84 occupations = 1.020 / 0.993

### e. R5 (POOEt)

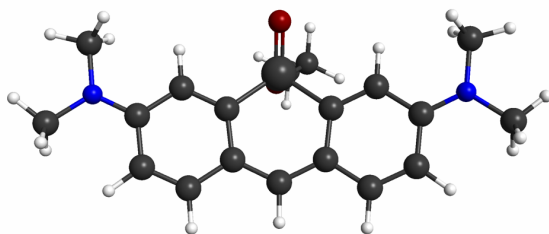

TDDFT-B3LYP-PCM(H<sub>2</sub>O)

$E(S0) = -1339.411043$

$E(SI^*) = -1339.328473$

Oscillator strength = 0.9473

$E(HOMO) = -0.2159$ ;  $E(LUMO) = -0.1287$

| EXCITATION DE-EXCITATION |     |           |           |
|--------------------------|-----|-----------|-----------|
| OCC                      | VIR | AMPLITUDE | AMPLITUDE |
| I                        | A   | X(I->A)   | Y(A->I)   |
| ---                      | --- | -----     | -----     |
| 89                       | 92  | -0.080762 | -0.011031 |
| 91                       | 92  | 0.999309  | -0.148276 |
| 89                       | 93  | 0.051754  | 0.026437  |
| 91                       | 93  | -0.078222 | -0.013468 |

| ATOM  | CHARGE | X             | Y             | Z             |
|-------|--------|---------------|---------------|---------------|
| ----- | -----  | -----         | -----         | -----         |
| C     | 6.0    | -1.0187910832 | 1.0011175626  | 0.1968931977  |
| C     | 6.0    | -1.9414543636 | -0.0795820571 | 0.3489633220  |
| C     | 6.0    | -1.5446340044 | -1.4230262834 | 0.3684354462  |
| C     | 6.0    | -0.2508791853 | -1.9344499763 | 0.1916797199  |
| C     | 6.0    | 0.9010504585  | -1.1057109501 | 0.0422867827  |
| P     | 15.0   | 0.7600578120  | 0.6762366226  | 0.2916746947  |
| C     | 6.0    | -2.8529272474 | 2.6070074799  | 0.0672066504  |
| C     | 6.0    | -3.7682047315 | 1.5346889071  | 0.2728261056  |
| C     | 6.0    | -3.3211359376 | 0.2502584906  | 0.3998100471  |
| C     | 6.0    | -1.4563668749 | 2.2880702698  | 0.0472836124  |
| H     | 1.0    | -4.8280322080 | 1.7276022898  | 0.3084713433  |
| H     | 1.0    | -4.0394528762 | -0.5497064424 | 0.5252690898  |
| H     | 1.0    | -0.7333100914 | 3.0757535518  | -0.0952521925 |
| N     | 7.0    | -3.2752069732 | 3.8687920683  | -0.1059254563 |
| C     | 6.0    | -2.3275318433 | 4.9532418331  | -0.3682239064 |
| C     | 6.0    | -4.7030287115 | 4.1880203552  | -0.0698003999 |
| H     | 1.0    | -2.8835293193 | 5.8690473609  | -0.5328735231 |
| H     | 1.0    | -1.7343722516 | 4.7456067119  | -1.2593004054 |
| H     | 1.0    | -4.8256929720 | 5.2582677205  | -0.1890249728 |
| H     | 1.0    | -5.2373308647 | 3.6837513917  | -0.8769604669 |
| H     | 1.0    | -1.6561921930 | 5.1049816159  | 0.4782976172  |
| H     | 1.0    | -5.1443466724 | 3.8931920387  | 0.8828152571  |
| H     | 1.0    | -2.3368690158 | -2.1548974297 | 0.4787078477  |
| C     | 6.0    | -0.0506657214 | -3.3363036830 | 0.1011087440  |
| C     | 6.0    | 2.1327760939  | -1.6388631018 | -0.2163403159 |
| C     | 6.0    | 1.1771609703  | -3.8832295520 | -0.1457195979 |
| C     | 6.0    | 2.3207784937  | -3.0534958944 | -0.3300709771 |
| N     | 7.0    | 3.5319235840  | -3.5679464489 | -0.5948647625 |
| C     | 6.0    | 3.7178437246  | -5.0138342052 | -0.7181896255 |
| C     | 6.0    | 4.7058497720  | -2.7040788481 | -0.7329505216 |
| H     | 1.0    | 2.9765832931  | -0.9778425846 | -0.3363801321 |

|   |     |               |               |               |
|---|-----|---------------|---------------|---------------|
| H | 1.0 | -0.9053484466 | -3.9888472230 | 0.2241630872  |
| H | 1.0 | 1.2720890009  | -4.9553092233 | -0.2026060070 |
| H | 1.0 | 4.7343901025  | -5.2086313133 | -1.0405916227 |
| H | 1.0 | 3.0358543197  | -5.4308714598 | -1.4590089409 |
| H | 1.0 | 5.5759322718  | -3.3251757759 | -0.9124534916 |
| H | 1.0 | 4.8776008554  | -2.1267765473 | 0.1765313749  |
| H | 1.0 | 4.5925641689  | -2.0169264181 | -1.5726585194 |
| H | 1.0 | 3.5520561055  | -5.5151101760 | 0.2374062477  |
| O | 8.0 | 1.5794396157  | 1.5410963810  | -0.5856839307 |
| O | 8.0 | 1.1228597274  | 0.7462706044  | 1.8444796534  |
| C | 6.0 | 1.1984065019  | 2.0081745657  | 2.5748150631  |
| C | 6.0 | 1.8368795710  | 1.7356160420  | 3.9166054140  |
| H | 1.0 | 1.7866168732  | 2.7132236715  | 1.9885446282  |
| H | 1.0 | 0.1861793038  | 2.3975983769  | 2.6892198186  |
| H | 1.0 | 2.8464068255  | 1.3439021035  | 3.7932138539  |
| H | 1.0 | 1.2480209489  | 1.0191486176  | 4.4893013053  |
| H | 1.0 | 1.8937134640  | 2.6658655008  | 4.4833297140  |

ORMAS-PT2-PCM(H<sub>2</sub>O) at B3LYP-PCM(H<sub>2</sub>O) optimized geometry

$E(S0) = -1337.259355$  : ORMAS-PCM natural orbitals 91 / 92 occupations = 1.942 / 0.079

$E(S1^*) = -1337.191502$  : ORMAS-PCM natural orbitals 91 / 92 occupations = 1.024 / 0.992

#### f. R6 (SO<sub>2</sub>)

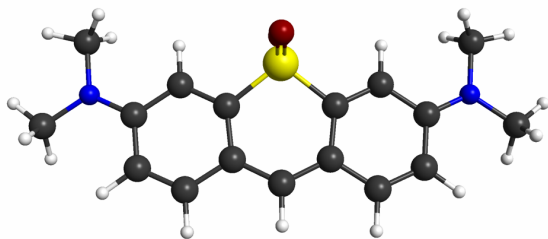

TDDFT-B3LYP-PCM(H<sub>2</sub>O)

$E(S0) = -1316.949052$

$E(S1^*) = -1316.867343$

Oscillator strength = 0.9217

$E(HOMO) = -0.2217$ ;  $E(LUMO) = -0.1356$

|     |     | EXCITATION DE-EXCITATION |           |
|-----|-----|--------------------------|-----------|
| OCC | VIR | AMPLITUDE                | AMPLITUDE |
| I   | A   | X(I->A)                  | Y(A->I)   |
| --- | --- | -----                    | -----     |
| 78  | 84  | 0.040368                 | -0.004842 |
| 81  | 84  | 0.086272                 | 0.012996  |
| 83  | 84  | -0.999111                | 0.150971  |
| 81  | 85  | -0.054551                | -0.028631 |

|    |    |           |           |
|----|----|-----------|-----------|
| 83 | 85 | 0.078604  | 0.013445  |
| 79 | 93 | -0.032413 | -0.019220 |

| ATOM | CHARGE | X             | Y             | Z             |
|------|--------|---------------|---------------|---------------|
| C    | 6.0    | -1.1715837556 | 0.9561906046  | 0.1479396286  |
| C    | 6.0    | -2.0868354438 | -0.1256352919 | 0.2617883714  |
| C    | 6.0    | -1.6826254294 | -1.4628743511 | 0.3048939614  |
| C    | 6.0    | -0.3722527928 | -1.9357579812 | 0.1853070106  |
| C    | 6.0    | 0.7558830334  | -1.0795077950 | 0.0615338272  |
| S    | 16.0   | 0.5800212648  | 0.6742290049  | 0.3285971512  |
| C    | 6.0    | -2.9632747052 | 2.5822249286  | 0.0049712537  |
| C    | 6.0    | -3.8936056558 | 1.5103196129  | 0.1461946208  |
| C    | 6.0    | -3.4646956734 | 0.2202259859  | 0.2660191565  |
| C    | 6.0    | -1.5698871329 | 2.2528242515  | 0.0167077799  |
| H    | 1.0    | -4.9518484741 | 1.7137803561  | 0.1564335150  |
| H    | 1.0    | -4.1922405912 | -0.5753884475 | 0.3579323031  |
| H    | 1.0    | -0.8289471759 | 3.0302772233  | -0.0779348205 |
| N    | 7.0    | -3.3655568312 | 3.8524416720  | -0.1330702623 |
| C    | 6.0    | -2.3956365997 | 4.9453636590  | -0.2331472189 |
| C    | 6.0    | -4.7906185783 | 4.1832756037  | -0.1834924902 |
| H    | 1.0    | -2.9321410396 | 5.8867640531  | -0.2522961606 |
| H    | 1.0    | -1.8052306421 | 4.8642320242  | -1.1473050607 |
| H    | 1.0    | -4.8947808531 | 5.2418419732  | -0.3913501125 |
| H    | 1.0    | -5.2906060498 | 3.6252884242  | -0.9754137855 |
| H    | 1.0    | -1.7254316858 | 4.9493353483  | 0.6262996925  |
| H    | 1.0    | -5.2791446552 | 3.9641897594  | 0.7676115682  |
| H    | 1.0    | -2.4640944383 | -2.2080216867 | 0.3916401210  |
| C    | 6.0    | -0.1078898835 | -3.3290492529 | 0.1097464005  |
| C    | 6.0    | 2.0184813348  | -1.5437032076 | -0.1582086236 |
| C    | 6.0    | 1.1464309432  | -3.8247318088 | -0.1000908994 |
| C    | 6.0    | 2.2623592840  | -2.9510552894 | -0.2615566373 |
| N    | 7.0    | 3.4959382464  | -3.4161575766 | -0.4995881861 |
| C    | 6.0    | 3.7415041727  | -4.8544710806 | -0.6190491164 |
| C    | 6.0    | 4.6387245829  | -2.5069101781 | -0.6114006276 |
| H    | 1.0    | 2.8339463585  | -0.8451310428 | -0.2567142319 |
| H    | 1.0    | -0.9392046386 | -4.0141628141 | 0.2113478339  |
| H    | 1.0    | 1.2858516936  | -4.8921734667 | -0.1475859393 |
| H    | 1.0    | 4.7666508551  | -5.0073938010 | -0.9361767136 |
| H    | 1.0    | 3.0805773073  | -5.2985879961 | -1.3626216033 |
| H    | 1.0    | 5.5349802404  | -3.0941404854 | -0.7743712560 |
| H    | 1.0    | 4.7682931458  | -1.9274982506 | 0.3034592559  |
| H    | 1.0    | 4.5153993086  | -1.8232167743 | -1.4523415376 |
| H    | 1.0    | 3.5911293185  | -5.3585510798 | 0.3373446565  |
| O    | 8.0    | 0.9148975928  | 0.9402383782  | 1.7121753226  |
| O    | 8.0    | 1.3001207225  | 1.3995081749  | -0.6926710178 |



ORMAS-PT2-PCM(H<sub>2</sub>O) at B3LYP-PCM(H<sub>2</sub>O) optimized geometry

$E(S0) = -1314.939256$  : ORMAS-PCM natural orbitals 83 / 84 occupations = 1.941 / 0.082

$E(S1^*) = -1314.872218$  : ORMAS-PCM natural orbitals 83 / 84 occupations = 1.021 / 0.997

**g. R7 (CO)**

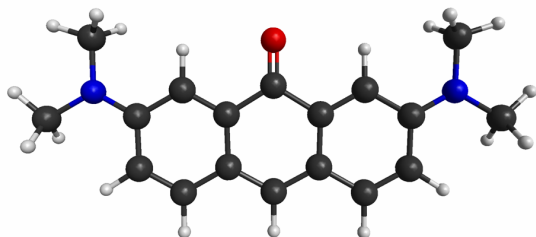

TDDFT-B3LYP-PCM(H<sub>2</sub>O)

$E(S0) = -881.696896$

$E(S1^*) = -881.633414$

Oscillator strength = 0.4134

$E(\text{HOMO}) = -0.2145$ ;  $E(\text{LUMO}) = -0.1409$

|     |     | EXCITATION | DE-EXCITATION |
|-----|-----|------------|---------------|
| OCC | VIR | AMPLITUDE  | AMPLITUDE     |
| I   | A   | X(I->A)    | Y(A->I)       |
| --- | --- | -----      | -----         |
| 69  | 75  | -0.061780  | -0.000915     |
| 71  | 75  | -0.100900  | -0.020839     |
| 74  | 75  | 0.991644   | -0.145842     |
| 71  | 76  | 0.053784   | 0.034598      |
| 74  | 76  | -0.139133  | -0.028770     |

| ATOM  | CHARGE | X             | Y             | Z             |
|-------|--------|---------------|---------------|---------------|
| ----- |        |               |               |               |
| C     | 6.0    | -1.2034425071 | 0.7691982394  | -0.0449898645 |
| C     | 6.0    | -2.2053617971 | -0.2437510631 | -0.0081977412 |
| C     | 6.0    | -1.8447886866 | -1.5945321176 | -0.0286292581 |
| C     | 6.0    | -0.5174591035 | -2.0275096269 | -0.0833140722 |
| C     | 6.0    | 0.5464688429  | -1.0802773752 | -0.1233196937 |
| C     | 6.0    | 0.2402299540  | 0.3843377050  | -0.1088102282 |
| C     | 6.0    | -2.9078844556 | 2.5103030043  | 0.0495966452  |
| C     | 6.0    | -3.9058611984 | 1.4930654817  | 0.0770387468  |
| C     | 6.0    | -3.5568122123 | 0.1702007706  | 0.0497504223  |
| C     | 6.0    | -1.5424017398 | 2.0950304407  | -0.0200080341 |
| H     | 1.0    | -4.9493530441 | 1.7595754845  | 0.1179770638  |

|   |     |               |               |               |
|---|-----|---------------|---------------|---------------|
| H | 1.0 | -4.3322845391 | -0.5844359892 | 0.0720884996  |
| H | 1.0 | -0.7485276554 | 2.8236531784  | -0.0482766655 |
| N | 7.0 | -3.2282632483 | 3.8149854620  | 0.0902347498  |
| C | 6.0 | -2.1946889100 | 4.8497905108  | 0.0316122047  |
| C | 6.0 | -4.6259786846 | 4.2329631518  | 0.1854749735  |
| H | 1.0 | -2.6730558161 | 5.8219501618  | 0.0663557091  |
| H | 1.0 | -1.6214366684 | 4.7810459892  | -0.8938959631 |
| H | 1.0 | -4.6639532583 | 5.3121408369  | 0.2806956627  |
| H | 1.0 | -5.1859975104 | 3.9424833377  | -0.7055927929 |
| H | 1.0 | -1.5107291744 | 4.7716580335  | 0.8779849091  |
| H | 1.0 | -5.1036707277 | 3.7914636651  | 1.0606727089  |
| H | 1.0 | -2.6304308232 | -2.3403286275 | 0.0006052367  |
| C | 6.0 | -0.1766386152 | -3.4011946346 | -0.0999410104 |
| C | 6.0 | 1.8510075985  | -1.4899090557 | -0.1767804179 |
| C | 6.0 | 1.1241363445  | -3.8205039629 | -0.1544174782 |
| C | 6.0 | 2.1922720311  | -2.8781300090 | -0.1968948318 |
| N | 7.0 | 3.4757827598  | -3.2708627268 | -0.2559706272 |
| C | 6.0 | 3.8175682012  | -4.6913148057 | -0.3206917558 |
| C | 6.0 | 4.5651932272  | -2.2937580483 | -0.2663143500 |
| H | 1.0 | 2.6196352214  | -0.7348876802 | -0.2091887771 |
| H | 1.0 | -0.9706424758 | -4.1359233887 | -0.0666366604 |
| H | 1.0 | 1.3350951580  | -4.8775081640 | -0.1605544964 |
| H | 1.0 | 4.8894249776  | -4.7873640332 | -0.4500487483 |
| H | 1.0 | 3.3232701028  | -5.1718903867 | -1.1657171644 |
| H | 1.0 | 5.5096660324  | -2.8247509101 | -0.2354114803 |
| H | 1.0 | 4.5116202125  | -1.6389562274 | 0.6036698310  |
| H | 1.0 | 4.5398473588  | -1.6838451303 | -1.1710615061 |
| H | 1.0 | 3.5296237724  | -5.2089765296 | 0.5964929630  |
| O | 8.0 | 1.1254564564  | 1.2226474892  | -0.1462959683 |

ORMAS-PT2-PCM(H<sub>2</sub>O) at B3LYP-PCM(H<sub>2</sub>O) optimized geometry

$E(S0) = -880.145356$  : ORMAS-PCM natural orbitals 74 / 75 occupations = 1.944 / 0.086

$E(S1^*) = -880.088493$  : ORMAS-PCM natural orbitals 74 / 75 occupations = 1.019 / 1.003

**II. Energies ( $S0^*$  &  $S1$  in hartree), oscillator strengths ( $S1 \rightarrow S0^*$ ), HOMO and LUMO energies (hartree), excitation/de-excitation amplitudes, and  $S1$  optimized structures ( $\text{\AA}$ )**

**a. R1 (NH)**

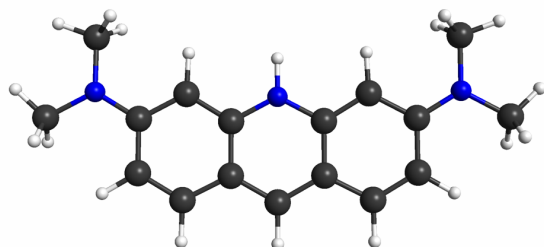

TDDFT-B3LYP-PCM( $H_2O$ )

$E(S0^*) = -823.751804$

$E(S1) = -823.659290$

Oscillator strength = 1.2158

$E(HOMO) = -0.2093$ ;  $E(LUMO) = -0.1003$

|     |     | EXCITATION | DE-EXCITATION |
|-----|-----|------------|---------------|
| OCC | VIR | AMPLITUDE  | AMPLITUDE     |
| I   | A   | X(I->A)    | Y(A->I)       |
| 71  | 72  | 0.995506   | -0.059008     |
| 69  | 73  | 0.031813   | 0.019036      |
| 70  | 73  | -0.072873  | -0.025075     |
| 69  | 74  | 0.041775   | 0.008802      |

| ATOM | CHARGE | X             | Y             | Z             |
|------|--------|---------------|---------------|---------------|
| C    | 6.0    | -1.2434941764 | 0.6555102058  | -0.0470436165 |
| C    | 6.0    | -2.2849583635 | -0.3221392607 | -0.0094916940 |
| C    | 6.0    | -1.9488236656 | -1.6931271856 | -0.0361514567 |
| C    | 6.0    | -0.5992220001 | -2.1014072238 | -0.0912159301 |
| C    | 6.0    | 0.4319643031  | -1.1127785979 | -0.1266506782 |
| N    | 7.0    | 0.0612407653  | 0.2151048405  | -0.1089456657 |
| C    | 6.0    | -2.8626633144 | 2.4704940255  | 0.0541532164  |
| C    | 6.0    | -3.9072635687 | 1.5017494106  | 0.0891659377  |
| C    | 6.0    | -3.6155763237 | 0.1602782365  | 0.0566597082  |
| C    | 6.0    | -1.5270806977 | 2.0112463067  | -0.0188639316 |
| H    | 1.0    | -4.9376733835 | 1.8141158068  | 0.1378537912  |
| H    | 1.0    | -4.4220314293 | -0.5607226128 | 0.0827094972  |
| H    | 1.0    | -0.7070481430 | 2.7119583358  | -0.0454343876 |
| N    | 7.0    | -3.1408826402 | 3.8056123098  | 0.0919623724  |
| C    | 6.0    | -2.0736144639 | 4.7911982048  | 0.0077771919  |
| C    | 6.0    | -4.5152879088 | 4.2730323055  | 0.1977735191  |
| H    | 1.0    | -2.5065743503 | 5.7849462620  | 0.0346481781  |

|   |     |               |               |               |
|---|-----|---------------|---------------|---------------|
| H | 1.0 | -1.5094798942 | 4.6831146773  | -0.9222461730 |
| H | 1.0 | -4.5167547630 | 5.3542806678  | 0.2797862059  |
| H | 1.0 | -5.0993311742 | 3.9902136367  | -0.6826077957 |
| H | 1.0 | -1.3770287898 | 4.6939891017  | 0.8448927601  |
| H | 1.0 | -5.0028866764 | 3.8564039613  | 1.0815632200  |
| H | 1.0 | -2.7319711434 | -2.4375366216 | -0.0093471997 |
| C | 6.0 | -0.1903185536 | -3.4580038252 | -0.1111116148 |
| C | 6.0 | 1.7694077354  | -1.4696894384 | -0.1782058544 |
| C | 6.0 | 1.1322751929  | -3.8219990191 | -0.1637057352 |
| C | 6.0 | 2.1548963291  | -2.8302110626 | -0.2013157805 |
| N | 7.0 | 3.4715577710  | -3.1831039576 | -0.2585109589 |
| C | 6.0 | 3.8625937964  | -4.5839294501 | -0.3185188371 |
| C | 6.0 | 4.5147770921  | -2.1689187618 | -0.2499128484 |
| H | 1.0 | 2.5130533547  | -0.6887163586 | -0.2052291369 |
| H | 1.0 | -0.9532009590 | -4.2247835495 | -0.0813648343 |
| H | 1.0 | 1.3889439993  | -4.8688166817 | -0.1719644143 |
| H | 1.0 | 4.9384235399  | -4.6445704411 | -0.4386137931 |
| H | 1.0 | 3.3895534222  | -5.0863384229 | -1.1648074022 |
| H | 1.0 | 5.4827955990  | -2.6571643221 | -0.2617732805 |
| H | 1.0 | 4.4519521422  | -1.5453116641 | 0.6454987212  |
| H | 1.0 | 4.4439331705  | -1.5185374636 | -1.1263042165 |
| H | 1.0 | 3.5841974448  | -5.1151032511 | 0.5962441918  |
| H | 1.0 | 0.7926669646  | 0.9096043368  | -0.1324805349 |

ORMAS-PT2-PCM(H<sub>2</sub>O) at TDDFT-B3LYP-PCM(H<sub>2</sub>O) optimized geometry

$E(S0^*) = -822.282254$  : ORMAS-PCM natural orbitals 71 / 72 occupations = 1.938 / 0.074

$E(S1) = -822.191649$  : ORMAS-PCM natural orbitals 71 / 72 occupations = 1.197 / 0.817

**b. R2 (O)**

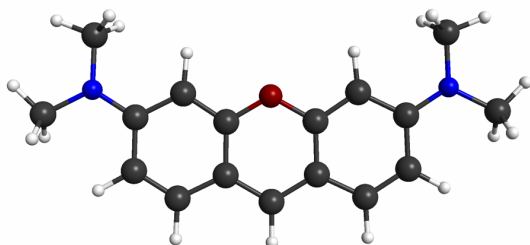

TDDFT-B3LYP-PCM(H<sub>2</sub>O)

$E(S0^*) = -843.600340$

$E(S1) = -843.513375$

Oscillator strength = 1.3147

$E(\text{HOMO}) = -0.2133$ ;  $E(\text{LUMO}) = -0.1115$

EXCITATION DE-EXCITATION  
OCC VIR AMPLITUDE AMPLITUDE  
I A X(I->A) Y(A->I)

| I  | A  | X(I->A)   | Y(A->I)  |
|----|----|-----------|----------|
| 71 | 72 | -0.998267 | 0.072716 |
| 69 | 73 | 0.035667  | 0.020514 |
| 70 | 73 | 0.036749  | 0.017419 |
| 69 | 75 | 0.030021  | 0.006552 |

| ATOM | CHARGE | X             | Y             | Z             |
|------|--------|---------------|---------------|---------------|
| C    | 6.0    | -1.2755569776 | 0.5844106185  | -0.0428430322 |
| C    | 6.0    | -2.3232886781 | -0.3732412156 | -0.0043803752 |
| C    | 6.0    | -2.0059623276 | -1.7471524338 | -0.0344944940 |
| C    | 6.0    | -0.6517921717 | -2.1360525889 | -0.0921887659 |
| C    | 6.0    | 0.3599687787  | -1.1403048662 | -0.1245159556 |
| O    | 8.0    | 0.0356781724  | 0.1910678717  | -0.1067265126 |
| C    | 6.0    | -2.8329741871 | 2.4342599670  | 0.0582204072  |
| C    | 6.0    | -3.8994189434 | 1.4875761093  | 0.0988488350  |
| C    | 6.0    | -3.6434030322 | 0.1412727236  | 0.0663831647  |
| C    | 6.0    | -1.5059614275 | 1.9394599721  | -0.0163423069 |
| H    | 1.0    | -4.9216919852 | 1.8251348164  | 0.1517610877  |
| H    | 1.0    | -4.4668601101 | -0.5597919165 | 0.0956283762  |
| H    | 1.0    | -0.6568503901 | 2.6029402032  | -0.0476213187 |
| N    | 7.0    | -3.0772241971 | 3.7711631859  | 0.0901765200  |
| C    | 6.0    | -1.9841754063 | 4.7286824523  | -0.0009688478 |
| C    | 6.0    | -4.4406013999 | 4.2750682210  | 0.1878619840  |
| H    | 1.0    | -2.3908090385 | 5.7333640807  | 0.0231281964  |
| H    | 1.0    | -1.4271702163 | 4.6004182393  | -0.9325254445 |
| H    | 1.0    | -4.4140910291 | 5.3568015348  | 0.2557149037  |
| H    | 1.0    | -5.0287097102 | 3.9953079211  | -0.6905143736 |
| H    | 1.0    | -1.2884281229 | 4.6155194183  | 0.8345351648  |
| H    | 1.0    | -4.9399533576 | 3.8825983089  | 1.0760888352  |
| H    | 1.0    | -2.7880831193 | -2.4916019249 | -0.0089440824 |
| C    | 6.0    | -0.2107822065 | -3.4837409977 | -0.1178779634 |
| C    | 6.0    | 1.6998736888  | -1.4444715605 | -0.1756209977 |
| C    | 6.0    | 1.1185432816  | -3.8132652163 | -0.1711174221 |
| C    | 6.0    | 2.1206711783  | -2.7982423682 | -0.2032262072 |
| N    | 7.0    | 3.4413870101  | -3.1166454530 | -0.2586938435 |
| C    | 6.0    | 3.8677254140  | -4.5082110147 | -0.3163503377 |
| C    | 6.0    | 4.4596872714  | -2.0760137148 | -0.2453134002 |
| H    | 1.0    | 2.4087224760  | -0.6327535355 | -0.1985448871 |
| H    | 1.0    | -0.9553993827 | -4.2681846719 | -0.0918658488 |
| H    | 1.0    | 1.3998544405  | -4.8536336462 | -0.1844849361 |
| H    | 1.0    | 4.9455710624  | -4.5424251391 | -0.4279331605 |
| H    | 1.0    | 3.4133144793  | -5.0207821618 | -1.1665011213 |

|   |     |              |               |               |
|---|-----|--------------|---------------|---------------|
| H | 1.0 | 5.4391812314 | -2.5403571844 | -0.2644347969 |
| H | 1.0 | 4.3834788719 | -1.4618659345 | 0.6555264922  |
| H | 1.0 | 4.3684516733 | -1.4214636080 | -1.1163772174 |
| H | 1.0 | 3.5951157371 | -5.0448669118 | 0.5966625321  |

ORMAS-PT2-PCM(H<sub>2</sub>O) at TDDFT-B3LYP-PCM(H<sub>2</sub>O) optimized geometry

$E(S0^*) = -842.114045$  : ORMAS-PCM natural orbitals 71 / 72 occupations = 1.945 / 0.069

$E(S1) = -842.029965$  : ORMAS-PCM natural orbitals 71 / 72 occupations = 1.023 / 0.988

### c. R3 (CMe<sub>2</sub>)

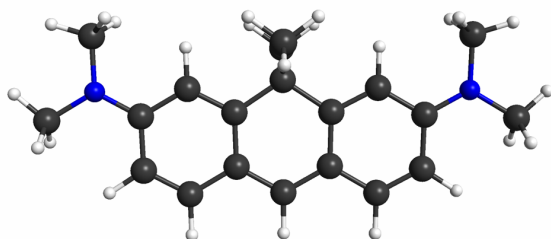

TDDFT-B3LYP-PCM(H<sub>2</sub>O)

$E(S0^*) = -886.267502$

$E(S1) = -886.186503$

Oscillator strength = 1.3897

$E(HOMO) = -0.2075$ ;  $E(LUMO) = -0.1132$

|     |     | EXCITATION | DE-EXCITATION |
|-----|-----|------------|---------------|
| OCC | VIR | AMPLITUDE  | AMPLITUDE     |
| I   | A   | X(I->A)    | Y(A->I)       |
| --- | --- | -----      | -----         |
| 79  | 80  | 0.999975   | -0.086413     |

| ATOM | CHARGE | X             | Y             | Z             |
|------|--------|---------------|---------------|---------------|
| C    | 6.0    | -1.1968613423 | 0.7819047415  | -0.1091392652 |
| C    | 6.0    | -2.1925478885 | -0.2295478929 | 0.0423808544  |
| C    | 6.0    | -1.8449829415 | -1.5952281862 | 0.0687908457  |
| C    | 6.0    | -0.5059503406 | -2.0162359651 | -0.0482293453 |
| C    | 6.0    | 0.5535810235  | -1.0722760695 | -0.2020719300 |
| C    | 6.0    | 0.2885975717  | 0.4367611209  | -0.2615194248 |
| C    | 6.0    | -2.9430358280 | 2.5066536808  | 0.0100146921  |
| C    | 6.0    | -3.9274306817 | 1.4842818351  | 0.1535305592  |
| C    | 6.0    | -3.5521725327 | 0.1713878550  | 0.1682358073  |
| C    | 6.0    | -1.5877056856 | 2.1061341086  | -0.1233321802 |
| H    | 1.0    | -4.9704905296 | 1.7393112618  | 0.2513585369  |
| H    | 1.0    | -4.3064711279 | -0.5968151203 | 0.2793921531  |
| H    | 1.0    | -0.8371560453 | 2.8705823539  | -0.2380452970 |

|   |     |               |               |               |
|---|-----|---------------|---------------|---------------|
| N | 7.0 | -3.2938329355 | 3.8192100418  | 0.0037873075  |
| C | 6.0 | -2.2857209571 | 4.8604519825  | -0.1462817150 |
| C | 6.0 | -4.6861118761 | 4.2193677039  | 0.1653402665  |
| H | 1.0 | -2.7737948294 | 5.8284674850  | -0.1391285182 |
| H | 1.0 | -1.7442194466 | 4.7522364009  | -1.0890619866 |
| H | 1.0 | -4.7424450475 | 5.3020169094  | 0.1686994802  |
| H | 1.0 | -5.3047808175 | 3.8421167943  | -0.6529311087 |
| H | 1.0 | -1.5633095682 | 4.8293706864  | 0.6733784633  |
| H | 1.0 | -5.0944866831 | 3.8469166439  | 1.1074952016  |
| H | 1.0 | -2.6233966771 | -2.3368055147 | 0.1845881525  |
| C | 6.0 | -0.1799736627 | -3.4017522415 | -0.0134430907 |
| C | 6.0 | 1.8494700346  | -1.5364028315 | -0.3082025782 |
| C | 6.0 | 1.1050483465  | -3.8494046912 | -0.1223401175 |
| C | 6.0 | 2.1748030366  | -2.9183955768 | -0.2734988718 |
| N | 7.0 | 3.4603390350  | -3.3430640497 | -0.3807805711 |
| C | 6.0 | 3.7783736415  | -4.7655679820 | -0.4014595430 |
| C | 6.0 | 4.5560407850  | -2.3880992142 | -0.4758298945 |
| H | 1.0 | 2.6495052790  | -0.8247714921 | -0.4296802488 |
| H | 1.0 | -0.9843038942 | -4.1162818978 | 0.1055542644  |
| H | 1.0 | 1.3030470353  | -4.9087814639 | -0.0857706057 |
| H | 1.0 | 4.8415775103  | -4.8848223996 | -0.5768239387 |
| H | 1.0 | 3.2363799093  | -5.2774137572 | -1.1993172981 |
| H | 1.0 | 5.4964409626  | -2.9274906947 | -0.4743129234 |
| H | 1.0 | 4.5495652289  | -1.7003372319 | 0.3723303782  |
| H | 1.0 | 4.4940218793  | -1.8020988837 | -1.3971045594 |
| H | 1.0 | 3.5272073681  | -5.2446394948 | 0.5490311118  |
| C | 6.0 | 0.7866335375  | 0.9762498802  | -1.6308403155 |
| C | 6.0 | 1.0857648594  | 1.1305025134  | 0.8769516866  |
| H | 1.0 | 0.2473291229  | 0.5040612228  | -2.4523330658 |
| H | 1.0 | 0.6382561462  | 2.0530369396  | -1.6984986693 |
| H | 1.0 | 1.8495551767  | 0.7781294760  | -1.7608117239 |
| H | 1.0 | 2.1522451715  | 0.9345209636  | 0.7784976499  |
| H | 1.0 | 0.7596594182  | 0.7703317109  | 1.8528394045  |
| H | 1.0 | 0.9454895189  | 2.2098846795  | 0.8468208198  |

ORMAS-PT2-PCM(H<sub>2</sub>O) at TDDFT-B3LYP-PCM(H<sub>2</sub>O) optimized geometry

$E(S0^*) = -884.671127$  : ORMAS-PCM natural orbitals 79 / 80 occupations = 1.945 / 0.069

$E(S1) = -884.597771$  : ORMAS-PCM natural orbitals 79 / 80 occupations = 1.020 / 0.991

d. R4 (SiMe<sub>2</sub>)

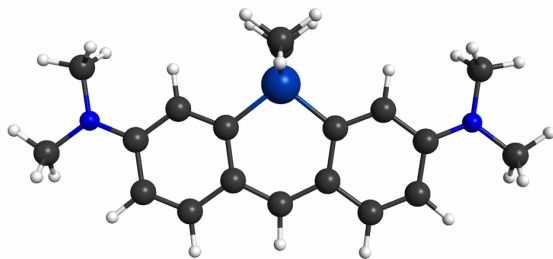

TDDFT-B3LYP-PCM(H<sub>2</sub>O)

$E(S0^*) = -1137.677685$

$E(S1) = -1137.600506$

Oscillator strength = 1.3907

$E(HOMO) = -0.2084$ ;  $E(LUMO) = -0.1180$

|     |     | EXCITATION | DE-EXCITATION |
|-----|-----|------------|---------------|
| OCC | VIR | AMPLITUDE  | AMPLITUDE     |
| I   | A   | X(I->A)    | Y(A->I)       |
| --- | --- | -----      | -----         |
| 78  | 84  | -0.034581  | 0.005232      |
| 83  | 84  | 0.999707   | -0.090040     |

| ATOM  | CHARGE | X             | Y             | Z             |
|-------|--------|---------------|---------------|---------------|
| ----- | -----  | -----         | -----         | -----         |
| C     | 6.0    | -1.2147714315 | 1.0275961553  | 0.0069642133  |
| C     | 6.0    | -2.1102480726 | -0.0962401736 | 0.0626204198  |
| C     | 6.0    | -1.6913247871 | -1.4482053224 | 0.0546472410  |
| C     | 6.0    | -0.3675570788 | -1.9434693186 | -0.0305589655 |
| C     | 6.0    | 0.8034334456  | -1.1123787090 | -0.1033821997 |
| SI    | 14.0   | 0.6467477598  | 0.7601549945  | -0.0491282835 |
| C     | 6.0    | -3.1388426899 | 2.5657320163  | 0.0567151636  |
| C     | 6.0    | -4.0141005705 | 1.4382793175  | 0.1197553704  |
| C     | 6.0    | -3.5103774762 | 0.1700592234  | 0.1225627309  |
| C     | 6.0    | -1.7414964495 | 2.3067335817  | 0.0045472919  |
| H     | 1.0    | -5.0820871465 | 1.5806824158  | 0.1651279218  |
| H     | 1.0    | -4.1947400414 | -0.6676194802 | 0.1686944133  |
| H     | 1.0    | -1.0679072251 | 3.1502467830  | -0.0380503092 |
| N     | 7.0    | -3.6310705944 | 3.8286349879  | 0.0497976656  |
| C     | 6.0    | -2.7356381932 | 4.9766932509  | -0.0062922732 |
| C     | 6.0    | -5.0682473383 | 4.0707891071  | 0.1175399938  |
| H     | 1.0    | -3.3255271564 | 5.8861312974  | -0.0179568072 |
| H     | 1.0    | -2.1191755805 | 4.9502248372  | -0.9078855770 |
| H     | 1.0    | -5.2494651258 | 5.1393662841  | 0.0868648882  |
| H     | 1.0    | -5.5850170568 | 3.6073497006  | -0.7256892599 |
| H     | 1.0    | -2.0737760251 | 5.0012544084  | 0.8630847815  |



|   |     |               |               |               |
|---|-----|---------------|---------------|---------------|
| H | 1.0 | -5.4908094532 | 3.6730004812  | 1.0432478300  |
| H | 1.0 | -2.4770109385 | -2.1913964263 | 0.1056391448  |
| C | 6.0 | -0.1823943148 | -3.3572634838 | -0.0555337069 |
| C | 6.0 | 2.0467532609  | -1.7097880187 | -0.2070297134 |
| C | 6.0 | 1.0521131376  | -3.9314286970 | -0.1552070457 |
| C | 6.0 | 2.2246898405  | -3.1191420187 | -0.2386422101 |
| N | 7.0 | 3.4547538122  | -3.6796032831 | -0.3432386605 |
| C | 6.0 | 3.6195118246  | -5.1288053395 | -0.3404259729 |
| C | 6.0 | 4.6451375612  | -2.8470393601 | -0.4600307500 |
| H | 1.0 | 2.9237039563  | -1.0817324312 | -0.2611939134 |
| H | 1.0 | -1.0559073033 | -3.9942611190 | 0.0012767885  |
| H | 1.0 | 1.1326772456  | -5.0066038371 | -0.1760443540 |
| H | 1.0 | 4.6778463180  | -5.3623512176 | -0.3695505066 |
| H | 1.0 | 3.1391922751  | -5.5834871648 | -1.2106392683 |
| H | 1.0 | 5.5122702002  | -3.4855970548 | -0.5853997247 |
| H | 1.0 | 4.7893138214  | -2.2356390190 | 0.4348882683  |
| H | 1.0 | 4.5753026941  | -2.1820785195 | -1.3237712105 |
| H | 1.0 | 3.1917990612  | -5.5703435802 | 0.5617749129  |
| C | 6.0 | 1.3998102355  | 1.5502879595  | -1.5824691920 |
| C | 6.0 | 1.4704531729  | 1.4624522059  | 1.4914171181  |
| H | 1.0 | 1.2398497502  | 2.6306467912  | -1.5806259881 |
| H | 1.0 | 2.4776388473  | 1.3783438027  | -1.6206954458 |
| H | 1.0 | 2.5446623921  | 1.2660970869  | 1.4823012146  |
| H | 1.0 | 1.3319542805  | 2.5446347036  | 1.5448853572  |
| H | 1.0 | 1.0512236991  | 1.0217811835  | 2.3970954711  |
| H | 1.0 | 0.9580706372  | 1.1428218684  | -2.4929125928 |

ORMAS-PT2-PCM(H<sub>2</sub>O) at TDDFT-B3LYP-PCM(H<sub>2</sub>O) optimized geometry

$E(S0^*) = -1135.720747$  : ORMAS-PCM natural orbitals 83 / 84 occupations = 1.944 / 0.073

$E(S1) = -1135.650797$  : ORMAS-PCM natural orbitals 83 / 84 occupations = 1.020 / 0.993

#### e. R5 (POOEt)

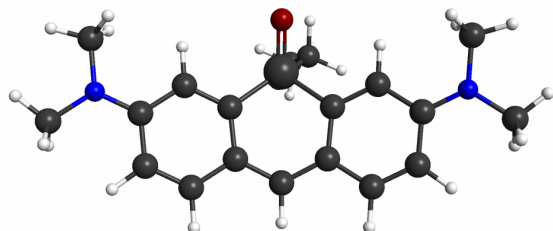

TDDFT-B3LYP-PCM(H<sub>2</sub>O)

$E(S0^*) = -1339.409126$

$E(S1) = -1339.338413$

Oscillator strength = 1.1349

$E(\text{HOMO}) = -0.2161$ ;  $E(\text{LUMO}) = -0.1327$

EXCITATION DE-EXCITATION

| OCC | VIR | AMPLITUDE | AMPLITUDE |
|-----|-----|-----------|-----------|
| I   | A   | X(I->A)   | Y(A->I)   |
| 89  | 92  | -0.051166 | -0.006417 |
| 91  | 92  | 0.999508  | -0.102031 |
| 91  | 93  | -0.036225 | -0.005631 |

| ATOM | CHARGE | X             | Y             | Z             |
|------|--------|---------------|---------------|---------------|
| C    | 6.0    | -1.0005154787 | 0.9876924978  | 0.2657291401  |
| C    | 6.0    | -1.9374171612 | -0.0884804299 | 0.4419522455  |
| C    | 6.0    | -1.5570610279 | -1.4445888201 | 0.5153546202  |
| C    | 6.0    | -0.2518440397 | -1.9353687919 | 0.2995080562  |
| C    | 6.0    | 0.8949037286  | -1.0886550546 | 0.1250413241  |
| P    | 15.0   | 0.7582160937  | 0.6699144454  | 0.4243489462  |
| C    | 6.0    | -2.8221663232 | 2.5955628811  | 0.0197523553  |
| C    | 6.0    | -3.7510312512 | 1.5346685195  | 0.2701056897  |
| C    | 6.0    | -3.3180870863 | 0.2557589029  | 0.4681452873  |
| C    | 6.0    | -1.4379793881 | 2.2758005585  | 0.0400875774  |
| H    | 1.0    | -4.8100234856 | 1.7370555317  | 0.2834269330  |
| H    | 1.0    | -4.0441640370 | -0.5313389065 | 0.6233919414  |
| H    | 1.0    | -0.7052668035 | 3.0520214295  | -0.1157967908 |
| N    | 7.0    | -3.2525117977 | 3.8535716687  | -0.2167547189 |
| C    | 6.0    | -2.3022318560 | 4.9161110177  | -0.5259552093 |
| C    | 6.0    | -4.6747530000 | 4.1837537872  | -0.1826840020 |
| H    | 1.0    | -2.8494387552 | 5.8213536562  | -0.7623324840 |
| H    | 1.0    | -1.6848669559 | 4.6456271938  | -1.3846114488 |
| H    | 1.0    | -4.7892870354 | 5.2501860939  | -0.3380417253 |
| H    | 1.0    | -5.2192005931 | 3.6562544457  | -0.9695232823 |
| H    | 1.0    | -1.6462640427 | 5.1167040968  | 0.3251863743  |
| H    | 1.0    | -5.1147671634 | 3.9234640336  | 0.7814521979  |
| H    | 1.0    | -2.3431811117 | -2.1739713539 | 0.6570022452  |
| C    | 6.0    | -0.0378191118 | -3.3378182046 | 0.1869252956  |
| C    | 6.0    | 2.1235009420  | -1.6152284287 | -0.2117429607 |
| C    | 6.0    | 1.1815985576  | -3.8630241163 | -0.1289420610 |
| C    | 6.0    | 2.3115821654  | -3.0145272806 | -0.3634515962 |
| N    | 7.0    | 3.5140489274  | -3.5329606823 | -0.6955836901 |
| C    | 6.0    | 3.7079799611  | -4.9760681758 | -0.8083356907 |
| C    | 6.0    | 4.6647138851  | -2.6618566625 | -0.9081217972 |
| H    | 1.0    | 2.9558790158  | -0.9426411591 | -0.3472494943 |
| H    | 1.0    | -0.8782173253 | -4.0022019552 | 0.3382080142  |
| H    | 1.0    | 1.2852254111  | -4.9331714832 | -0.2090384259 |
| H    | 1.0    | 4.7184415653  | -5.1662649982 | -1.1513343241 |
| H    | 1.0    | 3.0109187532  | -5.4091415613 | -1.5271045693 |

|   |     |              |               |               |
|---|-----|--------------|---------------|---------------|
| H | 1.0 | 5.5206641162 | -3.2678245482 | -1.1814126113 |
| H | 1.0 | 4.9065665452 | -2.1041698340 | -0.0000201001 |
| H | 1.0 | 4.4705534859 | -1.9481380029 | -1.7116179069 |
| H | 1.0 | 3.5678710997 | -5.4685019756 | 0.1569685638  |
| O | 8.0 | 1.6213265589 | 1.5624795285  | -0.3871783692 |
| O | 8.0 | 1.0830128272 | 0.7187515041  | 1.9954290858  |
| C | 6.0 | 1.1963942253 | 1.9802273796  | 2.7158418215  |
| C | 6.0 | 1.7972687906 | 1.6980344917  | 4.0737955084  |
| H | 1.0 | 1.8226950928 | 2.6568479373  | 2.1353508608  |
| H | 1.0 | 0.1993077060 | 2.4138745234  | 2.8081325251  |
| H | 1.0 | 2.7921768941 | 1.2638667008  | 3.9745121309  |
| H | 1.0 | 1.1695686605 | 1.0115940463  | 4.6423336123  |
| H | 1.0 | 1.8814100916 | 2.6306820938  | 4.6333107764  |

ORMAS-PT2-PCM(H<sub>2</sub>O) at TDDFT-B3LYP-PCM(H<sub>2</sub>O) optimized geometry

$E(S0^*) = -1337.257894$  : ORMAS-PCM natural orbitals 91 / 92 occupations = 1.941 / 0.081

$E(S1) = -1337.193723$  : ORMAS-PCM natural orbitals 91 / 92 occupations = 1.023 / 0.995

**f. R6 (SO<sub>2</sub>)**

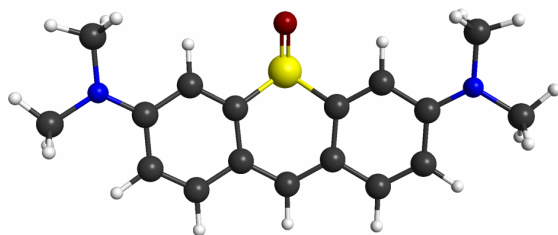

TDDFT-B3LYP-PCM(H<sub>2</sub>O)

$E(S0^*) = -1316.946196$

$E(S1) = -1316.877747$

Oscillator strength = 1.0264

$E(HOMO) = -0.2216$ ;  $E(LUMO) = -0.1404$

|     |     | EXCITATION DE-EXCITATION |           |
|-----|-----|--------------------------|-----------|
| OCC | VIR | AMPLITUDE                | AMPLITUDE |
| I   | A   | X(I->A)                  | Y(A->I)   |
| --- | --- | -----                    | -----     |
| 79  | 84  | 0.046159                 | -0.001455 |
| 81  | 84  | 0.061224                 | 0.008771  |
| 83  | 84  | 0.999317                 | -0.106741 |
| 81  | 85  | -0.031286                | -0.021279 |
| 83  | 85  | -0.037629                | -0.005749 |

| ATOM  | CHARGE | X | Y | Z |
|-------|--------|---|---|---|
| ----- |        |   |   |   |

|   |      |               |               |               |
|---|------|---------------|---------------|---------------|
| C | 6.0  | -1.1568498409 | 0.9115469366  | 0.4079459283  |
| C | 6.0  | -2.1033103295 | -0.1616204350 | 0.4900852224  |
| C | 6.0  | -1.7243881673 | -1.5143487408 | 0.5621022522  |
| C | 6.0  | -0.3996575764 | -1.9608514473 | 0.3913166976  |
| C | 6.0  | 0.7238475108  | -1.0751797233 | 0.3151333521  |
| S | 16.0 | 0.5227806774  | 0.5964284073  | 0.8337325779  |
| C | 6.0  | -2.8999680271 | 2.5421149763  | -0.0109245949 |
| C | 6.0  | -3.8633177432 | 1.4928334439  | 0.1544780773  |
| C | 6.0  | -3.4732965803 | 0.2066125719  | 0.3909854728  |
| C | 6.0  | -1.5280394413 | 2.2077012680  | 0.1443488216  |
| H | 1.0  | -4.9154122978 | 1.7117373383  | 0.0692759266  |
| H | 1.0  | -4.2219605639 | -0.5696163424 | 0.4744913586  |
| H | 1.0  | -0.7663089236 | 2.9681787879  | 0.0837709541  |
| N | 7.0  | -3.2872012012 | 3.8034935587  | -0.2866255299 |
| C | 6.0  | -2.2959600565 | 4.8515142486  | -0.5091109960 |
| C | 6.0  | -4.7020938525 | 4.1589405721  | -0.3666611971 |
| H | 1.0  | -2.8033474208 | 5.7571598515  | -0.8202955659 |
| H | 1.0  | -1.5943885224 | 4.5564333101  | -1.2907985177 |
| H | 1.0  | -4.7833437149 | 5.2266666192  | -0.5332969421 |
| H | 1.0  | -5.1908168925 | 3.6390080237  | -1.1936819925 |
| H | 1.0  | -1.7344354510 | 5.0607657324  | 0.4051318757  |
| H | 1.0  | -5.2205561967 | 3.9106716922  | 0.5607041540  |
| H | 1.0  | -2.5049772180 | -2.2586100542 | 0.6333079236  |
| C | 6.0  | -0.1221355467 | -3.3392195994 | 0.1817577255  |
| C | 6.0  | 1.9842312212  | -1.5035923155 | -0.0264355643 |
| C | 6.0  | 1.1255907113  | -3.7866076477 | -0.1431580912 |
| C | 6.0  | 2.2265485707  | -2.8792242926 | -0.2847036382 |
| N | 7.0  | 3.4511106597  | -3.3231722407 | -0.6333071168 |
| C | 6.0  | 3.6999267034  | -4.7452928737 | -0.8610133252 |
| C | 6.0  | 4.5679969734  | -2.3940131780 | -0.7670023014 |
| H | 1.0  | 2.7863736714  | -0.7850835164 | -0.0779570192 |
| H | 1.0  | -0.9385143097 | -4.0451516519 | 0.2534665339  |
| H | 1.0  | 1.2744351705  | -4.8413010364 | -0.3085161551 |
| H | 1.0  | 4.7418565857  | -4.8791083970 | -1.1269123459 |
| H | 1.0  | 3.0801851984  | -5.1224210034 | -1.6765373238 |
| H | 1.0  | 5.4410211885  | -2.9377294226 | -1.1082018988 |
| H | 1.0  | 4.8000936302  | -1.9230041953 | 0.1914846877  |
| H | 1.0  | 4.3388048126  | -1.6111601176 | -1.4927479625 |
| H | 1.0  | 3.4903052145  | -5.3281763109 | 0.0378439468  |
| O | 8.0  | 0.6319401299  | 0.6331732089  | 2.2814577316  |
| O | 8.0  | 1.4062879245  | 1.4679353741  | 0.0866239876  |

ORMAS-PT2-PCM(H<sub>2</sub>O) at TDDFT-B3LYP-PCM(H<sub>2</sub>O) optimized geometry

$E(S0^*) = -1314.937967$  : ORMAS-PCM natural orbitals 83 / 84 occupations = 1.938 / 0.086

$E(S1) = -1314.876096$  : ORMAS-PCM natural orbitals 83 / 84 occupations = 1.029 / 0.992

**g. R7 (CO)**

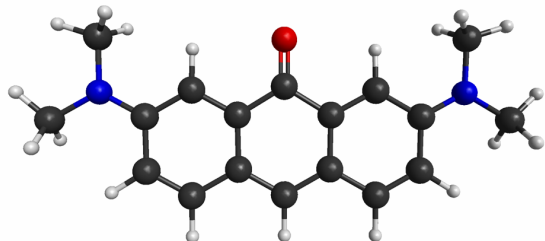

*TDDFT-B3LYP-PCM(H<sub>2</sub>O)*

$E(S0) = -881.693547$

$E(S1^*) = -881.641925$

Oscillator strength = 0.4808

$E(HOMO) = -0.2137$ ;  $E(LUMO) = -0.1461$

|     |     | EXCITATION | DE-EXCITATION |
|-----|-----|------------|---------------|
| OCC | VIR | AMPLITUDE  | AMPLITUDE     |
| I   | A   | X(I->A)    | Y(A->I)       |
| --- | --- | -----      | -----         |
| 69  | 75  | -0.057007  | -0.001654     |
| 71  | 75  | 0.068986   | 0.014047      |
| 74  | 75  | 0.998298   | -0.112927     |
| 71  | 76  | -0.031047  | -0.026474     |
| 74  | 76  | -0.071029  | -0.015802     |

| ATOM | CHARGE | X             | Y             | Z             |
|------|--------|---------------|---------------|---------------|
| C    | 6.0    | -1.1741695982 | 0.7639262670  | -0.0474247369 |
| C    | 6.0    | -2.1981986903 | -0.2511697300 | -0.0089774924 |
| C    | 6.0    | -1.8589870663 | -1.6081777584 | -0.0281540467 |
| C    | 6.0    | -0.5242123799 | -2.0193735948 | -0.0834717457 |
| C    | 6.0    | 0.5428377495  | -1.0497694651 | -0.1249938904 |
| C    | 6.0    | 0.2398903392  | 0.3846032459  | -0.1107223583 |
| C    | 6.0    | -2.8812765802 | 2.5041179819  | 0.0499233022  |
| C    | 6.0    | -3.8963327945 | 1.4822486903  | 0.0782845280  |
| C    | 6.0    | -3.5567551698 | 0.1653341627  | 0.0497011499  |
| C    | 6.0    | -1.5265380379 | 2.0981691811  | -0.0203959539 |
| H    | 1.0    | -4.9375803402 | 1.7576035718  | 0.1192201207  |
| H    | 1.0    | -4.3313967513 | -0.5893872824 | 0.0712995844  |
| H    | 1.0    | -0.7315430490 | 2.8246028326  | -0.0476469458 |
| N    | 7.0    | -3.2244820113 | 3.8041225151  | 0.0901573563  |
| C    | 6.0    | -2.1987540054 | 4.8429415944  | 0.0283845531  |
| C    | 6.0    | -4.6234716097 | 4.2225807909  | 0.1876968876  |

|   |     |               |               |               |
|---|-----|---------------|---------------|---------------|
| H | 1.0 | -2.6781236070 | 5.8142934488  | 0.0576645156  |
| H | 1.0 | -1.6219850549 | 4.7631092384  | -0.8948131290 |
| H | 1.0 | -4.6571265565 | 5.2999189482  | 0.3007018971  |
| H | 1.0 | -5.1785009431 | 3.9495896637  | -0.7118385682 |
| H | 1.0 | -1.5141823634 | 4.7628845037  | 0.8751241266  |
| H | 1.0 | -5.1049274473 | 3.7686625512  | 1.0535265600  |
| H | 1.0 | -2.6432121871 | -2.3528792721 | 0.0015134948  |
| C | 6.0 | -0.1811407504 | -3.4003363610 | -0.0993637953 |
| C | 6.0 | 1.8550522564  | -1.4735483694 | -0.1804987030 |
| C | 6.0 | 1.1141453346  | -3.8098361883 | -0.1548631885 |
| C | 6.0 | 2.1875940916  | -2.8505538510 | -0.1999985330 |
| N | 7.0 | 3.4650604450  | -3.2661337134 | -0.2572910319 |
| C | 6.0 | 3.8068629654  | -4.6881479506 | -0.3230967586 |
| C | 6.0 | 4.5589215820  | -2.2980063532 | -0.2593516070 |
| H | 1.0 | 2.6215481863  | -0.7173903862 | -0.2154502280 |
| H | 1.0 | -0.9751919465 | -4.1340883534 | -0.0637301494 |
| H | 1.0 | 1.3340577987  | -4.8650479876 | -0.1589559806 |
| H | 1.0 | 4.8760078997  | -4.7802573874 | -0.4737221022 |
| H | 1.0 | 3.2978217880  | -5.1729527396 | -1.1558675039 |
| H | 1.0 | 5.5016803013  | -2.8308902463 | -0.2236246364 |
| H | 1.0 | 4.4941907314  | -1.6408575136 | 0.6088310245  |
| H | 1.0 | 4.5340903531  | -1.6857423199 | -1.1635777437 |
| H | 1.0 | 3.5402004196  | -5.2003192384 | 0.6035112653  |
| O | 8.0 | 1.1447620984  | 1.2420393241  | -0.1484187969 |

ORMAS-PT2-PCM(H<sub>2</sub>O) at B3LYP-PCM(H<sub>2</sub>O) optimized geometry

$E(S0) = -880.142357$  : ORMAS-PCM natural orbitals 74 / 75 occupations = 1.940 / 0.094

$E(S1^*) = -880.091888$  : ORMAS-PCM natural orbitals 74 / 75 occupations = 1.019 / 1.006

## Section S9: References

1. Grimm, J. B., B. P. English, J. Chen, J. P. Slaughter, Z. Zhang, A. Revyakin, R. Patel, J. J. Macklin, D. Normanno, R. H. Singer, T. Lionnet and L. D. Lavis (2015) A general method to improve fluorophores for live-cell and single-molecule microscopy. *Nature Methods* **12**, 244-250.
2. Koide, Y., Y. Urano, K. Hanaoka, T. Terai and T. Nagano (2011) Evolution of Group 14 Rhodamines as Platforms for Near-Infrared Fluorescence Probes Utilizing Photoinduced Electron Transfer. *ACS Chemical Biology* **6**, 600-608.
3. Arden-Jacob, J., J. Frantzeskos, N. U. Kemnitzer, A. Zilles and K. H. Drexhage (2001) New fluorescent markers for the red region. *Spectrochimica Acta Part A: Molecular and Biomolecular Spectroscopy* **57**, 2271-2283.
4. Pastierik, T., P. Šebej, J. Medalová, P. Štacko and P. Klán (2014) Near-Infrared Fluorescent 9-Phenylethynylpyronin Analogues for Bioimaging. *The Journal of Organic Chemistry* **79**, 3374-3382.
5. Zhou, X., R. Lai, J. R. Beck, H. Li and C. I. Stains (2016) Nebraska Red: a phosphinate-based near-infrared fluorophore scaffold for chemical biology applications. *Chemical Communications* **52**, 12290-12293.
6. Deng, F., L. Liu, W. Huang, C. Huang, Q. Qiao and Z. Xu (2020) Systematic study of synthesizing various heteroatom-substituted rhodamines from diaryl ether analogues. *Spectrochimica Acta Part A: Molecular and Biomolecular Spectroscopy* **240**, 118466.
7. Schmidt, M. W., K. K. Baldrige, J. A. Boatz, S. T. Elbert, M. S. Gordon, J. H. Jensen, S. Koseki, N. Matsunaga, K. A. Nguyen, S. J. Su, T. L. Windus, M. Dupuis and J. A. Montgomery (1993) General Atomic and Molecular Electronic-Structure System. *J Comput Chem* **14**, 1347-1363.
8. Barca, G. M. J., C. Bertoni, L. Carrington, D. Datta, N. De Silva, J. E. Deustua, D. G. Fedorov, J. R. Gour, A. O. Gunina, E. Guidez, T. Harville, S. Irle, J. Ivanic, K. Kowalski, S. S. Leang, H. Li, W. Li, J. J. Lutz, I. Magoulas, J. Mato, V. Mironov, H. Nakata, B. Q. Pham, P. Piecuch, D. Poole, S. R. Pruitt, A. P. Rendell, L. B. Roskop, K. Ruedenberg, T. Sattasathuchana, M. W. Schmidt, J. Shen, L. Slipchenko, M. Sosonkina, V. Sundriyal, A. Tiwari, J. L. G. Vallejo, B. Westheimer, M. Wloch, P. Xu, F. Zahariev and M. S. Gordon (2020) Recent developments in the general atomic and molecular electronic structure system. *J Chem Phys* **152**.
9. Dunning, T. H. (1989) Gaussian-Basis Sets for Use in Correlated Molecular Calculations .1. The Atoms Boron through Neon and Hydrogen. *J Chem Phys* **90**, 1007-1023.
10. Dunning, T. H., K. A. Peterson and A. K. Wilson (2001) Gaussian basis sets for use in correlated molecular calculations. X. The atoms aluminum through argon revisited. *J Chem Phys* **114**, 9244-9253.
11. Bode, B. M. and M. S. Gordon (1998) MacMolPlt: A graphical user interface for GAMESS. *J Mol Graph Model* **16**, 133-+.
12. Kohn, W. and L. J. Sham (1965) Self-Consistent Equations Including Exchange and Correlation Effects. *Phys Rev* **140**, 1133-&.
13. Becke, A. D. (1993) Density-Functional Thermochemistry .3. The Role of Exact Exchange. *J Chem Phys* **98**, 5648-5652.

14. Stephens, P. J., F. J. Devlin, C. F. Chabalowski and M. J. Frisch (1994) Ab-Initio Calculation of Vibrational Absorption and Circular-Dichroism Spectra Using Density-Functional Force-Fields. *J Phys Chem-Us* **98**, 11623-11627.
15. Hertwig, R. H. and W. Koch (1997) On the parameterization of the local correlation functional. What is Becke-3-LYP? *Chem Phys Lett* **268**, 345-351.
16. Runge, E. and E. K. U. Gross (1984) Density-Functional Theory for Time-Dependent Systems. *Phys Rev Lett* **52**, 997-1000.
17. Gross, E. K. U. and W. Kohn (1990) Time-Dependent Density-Functional Theory. In *Advances in Quantum Chemistry*, Vol. 21. pp. 225-291. Acad.
18. LEEUWEN, R. V. (2001) KEY CONCEPTS IN TIME-DEPENDENT DENSITY-FUNCTIONAL THEORY. *International Journal of Modern Physics B* **15**, 1969-2023.
19. Chiba, M., T. Tsuneda and K. Hirao (2006) Excited state geometry optimizations by analytical energy gradient of long-range corrected time-dependent density functional theory. *J Chem Phys* **124**.
20. Murray, C. W., N. C. Handy and G. J. Laming (1993) Quadrature Schemes for Integrals of Density Functional Theory. *Mol Phys* **78**, 997-1014.
21. Lebedev, V. I. and D. N. Laikov (1999) Quadrature formula for the sphere of 131-th algebraic order of accuracy. *Dokl Akad Nauk+* **366**, 741-745.
22. Ivanic, J. (2003) Direct configuration interaction and multiconfigurational self-consistent-field method for multiple active spaces with variable occupations. I. Method. *J Chem Phys* **119**, 9364-9376.
23. Ivanic, J. (2003) Direct configuration interaction and multiconfigurational self-consistent-field method for multiple active spaces with variable occupations. II. Application to oxoMn(salen) and N<sub>2</sub>O<sub>4</sub>. *J Chem Phys* **119**, 9377-9385.
24. Roskop, L. and M. S. Gordon (2011) Quasi-degenerate second-order perturbation theory for occupation restricted multiple active space self-consistent field reference functions. *J Chem Phys* **135**.
25. Miertus, S., E. Scrocco and J. Tomasi (1981) Electrostatic Interaction of a Solute with a Continuum - a Direct Utilization of Abinitio Molecular Potentials for the Prevision of Solvent Effects. *Chem Phys* **55**, 117-129.
26. Li, H. and J. H. Jensen (2004) Improving the efficiency and convergence of geometry optimization with the polarizable continuum model: New energy gradients and molecular surface tessellation. *J Comput Chem* **25**, 1449-1462.
27. Tomasi, J., B. Mennucci and R. Cammi (2005) Quantum mechanical continuum solvation models. *Chem Rev* **105**, 2999-3093.
28. Li, H. (2009) Quantum mechanical/molecular mechanical/continuum style solvation model: Linear response theory, variational treatment, and nuclear gradients. *J Chem Phys* **131**.
29. Wang, Y. L. and H. Li (2010) Excited state geometry of photoactive yellow protein chromophore: A combined conductorlike polarizable continuum model and time-dependent density functional study. *J Chem Phys* **133**.
30. Mulliken, R. S. (1955) Electronic Population Analysis on Lcao-Mo Molecular Wave Functions .1. *J Chem Phys* **23**, 1833-1840.
